# Supplementary material for: Risk and prognostic nomograms for hepatocellular carcinoma with newly-diagnosed pulmonary metastasis using SEER data
Source: PeerJ. 2019 Aug 16;7:e7496. doi: 10.7717/peerj.7496 (PMC6699481; doi:10.7717/peerj.7496)
Supplement: Supplemental Information 2 [file peerj-07-7496-s002.xlsx]

## Sheet: Sheet1
Race recode (White, Black, Other)	Sex	Histologic Type ICD-O-3	Derived AJCC T, 7th ed (2010+)	Derived AJCC N, 7th ed (2010+)	RX Summ--Surg Prim Site (1998+)	Radiation sequence with surgery	Reason no cancer-directed surgery	Chemotherapy recode (yes, no/unk)	CS tumor size (2004+)	CS site-specific factor 1 (2004+ varying by schema)	CS mets at DX-bone (2010+)	CS mets at DX-brain (2010+)	CS mets at DX-liver (2010+)	CS mets at DX-lung (2010+)	SEER cause-specific death classification	Survival months	Vital status recode (study cutoff used)	Sequence number	Age at diagnosis	Patient ID
Black	Female	8170	T1	N0	16	No radiation and/or cancer-directed surgery	Surgery performed	No/Unknown	25	10	No	No	No	No	Alive or dead of other cause	7	Alive	1st of 2 or more primaries	70	1050530
White	Female	8170	T1	N0	0	No radiation and/or cancer-directed surgery	Not recommended	Yes	13	10	No	No	No	No	Dead (attributable to this cancer dx)	29	Dead	One primary only	75	5287262
White	Male	8170	T3b	N0	0	No radiation and/or cancer-directed surgery	Not recommended	No/Unknown	124	10	No	No	No	No	Alive or dead of other cause	14	Alive	One primary only	30	5349119
Other (American Indian/AK Native, Asian/Pacific Islander)	Male	8170	T3a	N0	0	No radiation and/or cancer-directed surgery	Not recommended	Yes	154	998	No	No	No	No	Alive or dead of other cause	28	Alive	One primary only	38	5349324
White	Male	8170	T2	N0	0	No radiation and/or cancer-directed surgery	Not recommended	No/Unknown	999	10	No	No	No	No	Dead (attributable to this cancer dx)	2	Dead	One primary only	62	5349418
Black	Male	8170	T3a	N0	0	No radiation and/or cancer-directed surgery	Not recommended	Yes	140	10	No	No	No	Yes	Dead (attributable to this cancer dx)	45	Dead	One primary only	53	5349694
Black	Male	8170	T2	N0	0	No radiation and/or cancer-directed surgery	Not recommended	No/Unknown	25	997	No	No	No	No	Dead (attributable to this cancer dx)	30	Dead	One primary only	81	5349737
Black	Female	8170	T1	N0	0	No radiation and/or cancer-directed surgery	Not recommended	Yes	112	999	No	No	No	No	Dead (attributable to this cancer dx)	20	Dead	One primary only	75	5349792
Black	Male	8170	T1	N0	0	No radiation and/or cancer-directed surgery	Not recommended	No/Unknown	35	10	No	No	No	No	Dead (attributable to this cancer dx)	17	Dead	One primary only	57	5349807
Black	Male	8170	T1	N0	0	No radiation and/or cancer-directed surgery	Not recommended	No/Unknown	999	999	No	No	No	Yes	Dead (attributable to this cancer dx)	3	Dead	One primary only	42	5350058
Black	Male	8170	T2	N0	60	No radiation and/or cancer-directed surgery	Surgery performed	No/Unknown	50	999	No	No	No	No	Dead (attributable to this cancer dx)	41	Dead	One primary only	69	5350140
White	Male	8170	T2	N0	0	No radiation and/or cancer-directed surgery	Not recommended	No/Unknown	49	10	No	No	No	No	Alive or dead of other cause	28	Dead	One primary only	54	5350251
Other (American Indian/AK Native, Asian/Pacific Islander)	Male	8170	T4	N0	0	No radiation and/or cancer-directed surgery	Not recommended	No/Unknown	40	999	No	No	No	No	Dead (attributable to this cancer dx)	2	Dead	One primary only	55	5350252
Other (American Indian/AK Native, Asian/Pacific Islander)	Female	8170	T2	N0	0	No radiation and/or cancer-directed surgery	Not recommended	Yes	38	10	No	No	No	No	Dead (attributable to this cancer dx)	59	Dead	One primary only	77	5350506
Other (American Indian/AK Native, Asian/Pacific Islander)	Male	8170	T3a	N0	0	No radiation and/or cancer-directed surgery	Not recommended	Yes	194	10	No	No	No	No	Dead (attributable to this cancer dx)	2	Dead	One primary only	47	5350515
Other (American Indian/AK Native, Asian/Pacific Islander)	Male	8170	T3a	N0	0	No radiation and/or cancer-directed surgery	Not recommended	Yes	60	10	No	No	No	No	Dead (attributable to this cancer dx)	28	Dead	One primary only	57	5350605
Other (American Indian/AK Native, Asian/Pacific Islander)	Female	8170	T1	N0	61	No radiation and/or cancer-directed surgery	Surgery performed	No/Unknown	22	10	No	No	No	No	Alive or dead of other cause	38	Alive	One primary only	63	5350640
Other (American Indian/AK Native, Asian/Pacific Islander)	Male	8170	T1	N0	0	No radiation and/or cancer-directed surgery	Not recommended	Yes	127	10	No	No	No	No	Alive or dead of other cause	71	Alive	One primary only	62	5350987
Other (American Indian/AK Native, Asian/Pacific Islander)	Male	8170	T3b	N0	0	No radiation and/or cancer-directed surgery	Not recommended	Yes	80	10	No	No	No	No	Dead (attributable to this cancer dx)	9	Dead	One primary only	73	5351035
White	Female	8170	T3a	N0	38	No radiation and/or cancer-directed surgery	Surgery performed	Yes	115	10	No	No	No	No	Dead (attributable to this cancer dx)	38	Dead	One primary only	84	5351101
White	Male	8170	T1	N0	0	No radiation and/or cancer-directed surgery	Not recommended	Yes	26	10	No	No	No	No	Alive or dead of other cause	70	Alive	One primary only	66	5351202
Other (American Indian/AK Native, Asian/Pacific Islander)	Male	8170	T3a	N0	0	No radiation and/or cancer-directed surgery	Not recommended	Yes	52	10	No	No	No	No	Dead (attributable to this cancer dx)	18	Dead	One primary only	57	5351204
Black	Male	8170	T1	N0	0	No radiation and/or cancer-directed surgery	Not recommended	No/Unknown	87	10	No	No	No	No	Dead (attributable to this cancer dx)	0	Dead	One primary only	54	5351596
White	Male	8170	T1	N0	0	No radiation and/or cancer-directed surgery	Not recommended	Yes	59	999	No	No	No	No	Alive or dead of other cause	41	Dead	One primary only	68	5351948
Black	Male	8170	T1	N0	0	No radiation and/or cancer-directed surgery	Not recommended	Yes	999	10	No	No	No	No	Dead (attributable to this cancer dx)	13	Dead	One primary only	60	5351967
Black	Female	8170	T2	N0	0	No radiation and/or cancer-directed surgery	Not recommended	Yes	41	10	No	No	No	No	Dead (attributable to this cancer dx)	40	Dead	One primary only	61	5352183
Other (American Indian/AK Native, Asian/Pacific Islander)	Male	8170	T1	N0	0	No radiation and/or cancer-directed surgery	Not recommended	No/Unknown	999	10	No	No	No	No	Dead (attributable to this cancer dx)	38	Dead	One primary only	68	5352195
Black	Female	8170	T3a	N0	0	No radiation and/or cancer-directed surgery	Not recommended	Yes	140	20	No	No	No	No	Dead (attributable to this cancer dx)	14	Dead	One primary only	46	5352395
Black	Male	8170	T1	N0	16	No radiation and/or cancer-directed surgery	Surgery performed	Yes	33	20	No	No	No	No	Alive or dead of other cause	71	Alive	One primary only	43	5352439
White	Male	8170	T1	N0	51	No radiation and/or cancer-directed surgery	Surgery performed	No/Unknown	137	20	No	No	No	No	Alive or dead of other cause	71	Alive	One primary only	70	5352878
White	Female	8170	T2	N1	0	No radiation and/or cancer-directed surgery	Not recommended	No/Unknown	35	20	No	No	No	No	Dead (attributable to this cancer dx)	2	Dead	One primary only	55	5352885
Other (American Indian/AK Native, Asian/Pacific Islander)	Male	8170	T2	N1	0	No radiation and/or cancer-directed surgery	Not recommended	Yes	44	20	No	No	No	No	Dead (attributable to this cancer dx)	12	Dead	One primary only	80	5352895
Other (American Indian/AK Native, Asian/Pacific Islander)	Male	8170	T2	N0	0	No radiation and/or cancer-directed surgery	Recommended, unknown if performed	Yes	18	20	No	No	No	No	Alive or dead of other cause	70	Alive	One primary only	58	5353427
Other (American Indian/AK Native, Asian/Pacific Islander)	Male	8170	T1	N0	61	No radiation and/or cancer-directed surgery	Surgery performed	No/Unknown	22	20	No	No	No	No	Alive or dead of other cause	70	Alive	One primary only	59	5353461
White	Male	8170	T1	N0	0	No radiation and/or cancer-directed surgery	Not recommended	No/Unknown	23	20	No	No	No	No	Alive or dead of other cause	1	Dead	One primary only	87	5354099
Other (American Indian/AK Native, Asian/Pacific Islander)	Female	8170	T1	N0	0	No radiation and/or cancer-directed surgery	Not recommended	Yes	74	10	No	No	No	No	Dead (attributable to this cancer dx)	3	Dead	One primary only	69	5354500
Other (American Indian/AK Native, Asian/Pacific Islander)	Female	8170	T3b	N0	0	No radiation and/or cancer-directed surgery	Not recommended	No/Unknown	999	10	No	No	No	No	Dead (attributable to this cancer dx)	1	Dead	One primary only	64	5354625
Black	Male	8170	T2	N1	16	No radiation and/or cancer-directed surgery	Surgery performed	No/Unknown	20	20	No	No	No	No	Alive or dead of other cause	69	Alive	One primary only	55	5354655
White	Male	8170	T3a	N0	0	No radiation and/or cancer-directed surgery	Not recommended	No/Unknown	120	10	No	No	No	No	Dead (attributable to this cancer dx)	0	Dead	One primary only	52	5354670
White	Female	8170	T3b	NX	0	No radiation and/or cancer-directed surgery	Not recommended	No/Unknown	54	10	No	No	No	No	Dead (attributable to this cancer dx)	4	Dead	One primary only	53	5354684
White	Male	8170	T3a	N0	0	No radiation and/or cancer-directed surgery	Not recommended	Yes	95	10	No	No	No	No	Dead (attributable to this cancer dx)	13	Dead	One primary only	64	5354695
White	Male	8170	T1	N0	16	No radiation and/or cancer-directed surgery	Surgery performed	No/Unknown	26	20	No	No	No	No	Dead (attributable to this cancer dx)	27	Dead	One primary only	63	5354725
Other (American Indian/AK Native, Asian/Pacific Islander)	Male	8170	T3b	N0	0	No radiation and/or cancer-directed surgery	Not recommended	No/Unknown	170	10	No	No	No	Yes	Dead (attributable to this cancer dx)	1	Dead	One primary only	39	5354737
Black	Male	8170	T1	N0	16	No radiation and/or cancer-directed surgery	Surgery performed	No/Unknown	20	10	No	No	No	No	Alive or dead of other cause	52	Alive	One primary only	65	5354806
Other (American Indian/AK Native, Asian/Pacific Islander)	Female	8170	T1	N0	0	No radiation and/or cancer-directed surgery	Recommended, unknown if performed	Yes	45	10	No	No	No	No	Alive or dead of other cause	70	Alive	One primary only	65	5354813
White	Male	8170	T1	N0	0	No radiation and/or cancer-directed surgery	Not recommended	Yes	45	10	No	No	No	No	Dead (attributable to this cancer dx)	25	Dead	One primary only	60	5354817
White	Male	8170	T3a	N0	16	No radiation and/or cancer-directed surgery	Surgery performed	No/Unknown	60	10	No	No	No	No	Dead (attributable to this cancer dx)	10	Dead	One primary only	55	5354821
Other (American Indian/AK Native, Asian/Pacific Islander)	Female	8170	T4	NX	0	No radiation and/or cancer-directed surgery	Not recommended	No/Unknown	999	999	Yes	No	No	No	Dead (attributable to this cancer dx)	2	Dead	One primary only	83	5354857
White	Male	8170	T3b	N0	0	No radiation and/or cancer-directed surgery	Not recommended	Yes	15	10	No	No	No	No	Dead (attributable to this cancer dx)	16	Dead	One primary only	54	5354871
Black	Male	8170	T1	N0	0	No radiation and/or cancer-directed surgery	Not recommended	No/Unknown	47	10	No	No	No	No	Dead (attributable to this cancer dx)	0	Dead	One primary only	59	5355014
White	Female	8170	T1	N0	16	No radiation and/or cancer-directed surgery	Surgery performed	No/Unknown	30	10	No	No	No	No	Alive or dead of other cause	52	Dead	One primary only	59	5355122
White	Male	8170	T1	N1	0	No radiation and/or cancer-directed surgery	Not recommended	Yes	22	20	No	No	No	No	Dead (attributable to this cancer dx)	6	Dead	One primary only	61	5355326
White	Female	8170	T2	N0	0	No radiation and/or cancer-directed surgery	Not recommended	Yes	35	10	No	No	No	No	Dead (attributable to this cancer dx)	7	Dead	One primary only	79	5355594
Other (American Indian/AK Native, Asian/Pacific Islander)	Male	8170	T1	N0	0	No radiation and/or cancer-directed surgery	Not recommended	Yes	120	20	No	No	No	No	Alive or dead of other cause	67	Alive	One primary only	66	5356077
Other (American Indian/AK Native, Asian/Pacific Islander)	Male	8170	T3a	N0	0	No radiation and/or cancer-directed surgery	Not recommended	Yes	70	10	No	No	No	No	Alive or dead of other cause	66	Alive	1st of 2 or more primaries	66	5356114
Other (American Indian/AK Native, Asian/Pacific Islander)	Female	8170	T4	NX	0	No radiation and/or cancer-directed surgery	Not recommended	No/Unknown	999	10	No	No	No	No	Alive or dead of other cause	1	Dead	One primary only	68	5356360
Other (American Indian/AK Native, Asian/Pacific Islander)	Female	8170	T2	N0	0	No radiation and/or cancer-directed surgery	Not recommended	No/Unknown	90	998	No	No	No	Yes	Dead (attributable to this cancer dx)	1	Dead	One primary only	82	5356695
White	Male	8170	T1	N0	0	No radiation and/or cancer-directed surgery	Not recommended	No/Unknown	47	998	No	No	No	No	Dead (attributable to this cancer dx)	17	Dead	One primary only	58	5356815
Other (American Indian/AK Native, Asian/Pacific Islander)	Female	8170	T1	N0	0	No radiation and/or cancer-directed surgery	Not recommended	No/Unknown	70	999	No	No	No	Yes	Dead (attributable to this cancer dx)	0	Dead	One primary only	78	5356830
White	Female	8170	T4	N1	0	No radiation and/or cancer-directed surgery	Not recommended	Yes	74	10	No	No	No	Yes	Dead (attributable to this cancer dx)	7	Dead	One primary only	61	5357058
White	Female	8170	T3b	N0	0	No radiation and/or cancer-directed surgery	Not recommended	No/Unknown	999	10	No	No	No	No	Dead (attributable to this cancer dx)	1	Dead	One primary only	49	5357060
Black	Female	8170	T2	N0	0	No radiation and/or cancer-directed surgery	Not recommended	Yes	11	10	No	No	No	No	Alive or dead of other cause	70	Alive	One primary only	60	5357073
Other (American Indian/AK Native, Asian/Pacific Islander)	Male	8170	T3b	N0	0	No radiation and/or cancer-directed surgery	Not recommended	No/Unknown	150	10	No	No	No	No	Dead (attributable to this cancer dx)	2	Dead	One primary only	51	5357374
Black	Female	8170	T1	N0	0	No radiation and/or cancer-directed surgery	Not recommended	No/Unknown	68	20	No	No	No	No	Alive or dead of other cause	3	Dead	One primary only	58	5357439
White	Female	8170	T1	N0	0	No radiation and/or cancer-directed surgery	Not recommended	No/Unknown	25	998	No	No	No	No	Dead (attributable to this cancer dx)	49	Dead	One primary only	90	5357451
White	Female	8170	TX	N0	0	No radiation and/or cancer-directed surgery	Not recommended	No/Unknown	66	999	No	No	No	No	Alive or dead of other cause	2	Dead	One primary only	91	5358505
White	Female	8170	T2	N0	0	No radiation and/or cancer-directed surgery	Not recommended	Yes	25	20	No	No	No	No	Alive or dead of other cause	69	Alive	One primary only	51	5359393
White	Female	8170	T1	N0	16	No radiation and/or cancer-directed surgery	Surgery performed	Yes	121	10	No	No	No	No	Dead (attributable to this cancer dx)	7	Dead	One primary only	63	5359458
White	Male	8170	T3b	N0	0	No radiation and/or cancer-directed surgery	Not recommended	Yes	77	10	No	No	No	No	Dead (attributable to this cancer dx)	19	Dead	One primary only	63	5359701
White	Male	8170	T1	N0	0	No radiation and/or cancer-directed surgery	Not recommended	No/Unknown	999	10	No	No	No	No	Dead (attributable to this cancer dx)	0	Dead	One primary only	58	5359775
Black	Female	8170	T4	N0	0	No radiation and/or cancer-directed surgery	Not recommended	No/Unknown	54	999	No	No	No	No	Dead (attributable to this cancer dx)	2	Dead	One primary only	71	5359852
Black	Male	8170	T1	N0	61	No radiation and/or cancer-directed surgery	Surgery performed	Yes	20	20	No	No	No	No	Alive or dead of other cause	66	Alive	One primary only	56	5359876
Black	Male	8170	TX	N1	0	No radiation and/or cancer-directed surgery	Not recommended	No/Unknown	999	20	No	No	No	No	Dead (attributable to this cancer dx)	2	Dead	One primary only	45	5360028
Black	Female	8170	T3a	N0	0	No radiation and/or cancer-directed surgery	Not recommended	Yes	69	10	No	No	No	No	Dead (attributable to this cancer dx)	24	Dead	One primary only	54	5360091
Other (American Indian/AK Native, Asian/Pacific Islander)	Male	8170	T2	N0	20	Radiation after surgery	Surgery performed	No/Unknown	38	20	No	No	No	No	Alive or dead of other cause	67	Alive	One primary only	39	5360106
White	Male	8170	T3a	N1	16	No radiation and/or cancer-directed surgery	Surgery performed	Yes	90	10	No	No	No	No	Alive or dead of other cause	22	Alive	One primary only	53	5360228
Black	Male	8170	T3b	N1	0	No radiation and/or cancer-directed surgery	Not recommended	No/Unknown	49	20	No	No	No	No	Dead (attributable to this cancer dx)	0	Dead	One primary only	74	5360292
White	Male	8170	T4	N1	0	No radiation and/or cancer-directed surgery	Not recommended	No/Unknown	17	10	No	No	Yes	Yes	Dead (attributable to this cancer dx)	1	Dead	One primary only	80	5360484
White	Male	8170	TX	N0	0	No radiation and/or cancer-directed surgery	Not recommended	Yes	45	20	No	No	No	No	Dead (attributable to this cancer dx)	6	Dead	One primary only	77	5360596
Other (American Indian/AK Native, Asian/Pacific Islander)	Male	8170	TX	N0	0	No radiation and/or cancer-directed surgery	Not recommended	No/Unknown	999	10	No	No	No	No	Dead (attributable to this cancer dx)	0	Dead	One primary only	79	5360668
White	Female	8170	T2	N0	61	No radiation and/or cancer-directed surgery	Surgery performed	Yes	35	10	No	No	No	No	Alive or dead of other cause	71	Alive	One primary only	58	5360674
White	Male	8170	T3b	N0	0	No radiation and/or cancer-directed surgery	Not recommended	No/Unknown	60	10	No	No	No	No	Dead (attributable to this cancer dx)	0	Dead	One primary only	73	5361365
White	Male	8170	T1	N0	0	No radiation and/or cancer-directed surgery	Not recommended	Yes	27	10	No	No	No	No	Alive or dead of other cause	71	Alive	One primary only	61	5361389
Other (American Indian/AK Native, Asian/Pacific Islander)	Female	8170	T1	N0	37	No radiation and/or cancer-directed surgery	Surgery performed	No/Unknown	42	10	No	No	No	No	Alive or dead of other cause	30	Alive	One primary only	60	5362073
Other (American Indian/AK Native, Asian/Pacific Islander)	Male	8170	T2	N0	0	No radiation and/or cancer-directed surgery	Not recommended	Yes	36	10	No	No	No	No	Alive or dead of other cause	66	Dead	One primary only	80	5362369
White	Male	8170	T1	N0	0	No radiation and/or cancer-directed surgery	Not recommended	Yes	30	10	No	No	No	No	Dead (attributable to this cancer dx)	9	Dead	One primary only	58	5362626
White	Male	8170	T2	N0	0	No radiation and/or cancer-directed surgery	Not recommended	Yes	28	10	No	No	No	No	Dead (attributable to this cancer dx)	18	Dead	One primary only	74	5362692
White	Male	8170	T3a	N1	0	No radiation and/or cancer-directed surgery	Not recommended	Yes	83	999	No	No	No	No	Dead (attributable to this cancer dx)	18	Dead	One primary only	68	5362775
Black	Male	8170	T4	N0	0	No radiation and/or cancer-directed surgery	Not recommended	No/Unknown	104	10	No	No	No	No	Dead (attributable to this cancer dx)	3	Dead	One primary only	53	5362777
Black	Female	8170	T1	N0	0	No radiation and/or cancer-directed surgery	Not recommended	No/Unknown	18	20	No	No	No	No	Dead (attributable to this cancer dx)	3	Dead	One primary only	59	5362839
White	Female	8170	T1	N0	16	No radiation and/or cancer-directed surgery	Surgery performed	No/Unknown	34	20	No	No	No	No	Dead (attributable to this cancer dx)	1	Dead	One primary only	84	5363380
Other (American Indian/AK Native, Asian/Pacific Islander)	Male	8170	T3a	N0	0	No radiation and/or cancer-directed surgery	Recommended but not performed, patient refused	No/Unknown	80	10	No	No	No	No	Dead (attributable to this cancer dx)	10	Dead	One primary only	77	5363407
White	Male	8170	T1	N0	0	No radiation and/or cancer-directed surgery	Not recommended	Yes	67	20	No	No	No	No	Dead (attributable to this cancer dx)	20	Dead	One primary only	67	5363740
Other (American Indian/AK Native, Asian/Pacific Islander)	Female	8170	T1	N0	36	No radiation and/or cancer-directed surgery	Surgery performed	No/Unknown	180	10	No	No	No	No	Alive or dead of other cause	63	Alive	One primary only	69	5363852
White	Female	8170	T1	N0	51	No radiation and/or cancer-directed surgery	Surgery performed	Yes	147	10	No	No	No	No	Alive or dead of other cause	68	Alive	One primary only	49	5364118
Other (American Indian/AK Native, Asian/Pacific Islander)	Male	8170	T1	N0	30	No radiation and/or cancer-directed surgery	Surgery performed	Yes	84	20	No	No	No	No	Alive or dead of other cause	30	Dead	One primary only	70	5364289
Other (American Indian/AK Native, Asian/Pacific Islander)	Female	8170	T4	N0	0	No radiation and/or cancer-directed surgery	Not recommended	Yes	180	10	No	No	No	Yes	Dead (attributable to this cancer dx)	4	Dead	One primary only	68	5364368
White	Male	8170	T2	N0	0	No radiation and/or cancer-directed surgery	Not recommended	No/Unknown	45	10	No	No	No	No	Dead (attributable to this cancer dx)	19	Dead	One primary only	54	5364615
Other (American Indian/AK Native, Asian/Pacific Islander)	Male	8170	T3b	N0	0	No radiation and/or cancer-directed surgery	Not recommended	No/Unknown	999	10	No	No	No	No	Dead (attributable to this cancer dx)	2	Dead	One primary only	45	5364621
Black	Male	8170	TX	NX	0	No radiation and/or cancer-directed surgery	Not recommended	No/Unknown	999	999	No	No	No	No	Dead (attributable to this cancer dx)	2	Dead	One primary only	68	5364627
White	Female	8170	T3a	N0	0	No radiation and/or cancer-directed surgery	Not recommended	No/Unknown	84	10	No	No	No	No	Dead (attributable to this cancer dx)	1	Dead	One primary only	79	5364689
White	Male	8170	T3a	N0	0	No radiation and/or cancer-directed surgery	Not recommended	No/Unknown	65	999	No	No	No	No	Alive or dead of other cause	2	Dead	One primary only	68	5364906
White	Male	8170	T2	N0	14	No radiation and/or cancer-directed surgery	Surgery performed	No/Unknown	21	20	No	No	No	No	Dead (attributable to this cancer dx)	39	Dead	One primary only	68	5365131
Other (American Indian/AK Native, Asian/Pacific Islander)	Male	8170	T1	N0	0	No radiation and/or cancer-directed surgery	Not recommended	No/Unknown	89	10	No	No	No	No	Alive or dead of other cause	44	Dead	One primary only	87	5365223
Other (American Indian/AK Native, Asian/Pacific Islander)	Male	8170	T1	N0	16	No radiation and/or cancer-directed surgery	Surgery performed	No/Unknown	55	10	No	No	No	No	Dead (attributable to this cancer dx)	26	Dead	One primary only	53	5365432
Other (American Indian/AK Native, Asian/Pacific Islander)	Male	8170	T3b	N0	36	No radiation and/or cancer-directed surgery	Surgery performed	Yes	115	10	No	No	No	No	Dead (attributable to this cancer dx)	19	Dead	One primary only	50	5365444
Other (American Indian/AK Native, Asian/Pacific Islander)	Female	8170	T4	N0	0	No radiation and/or cancer-directed surgery	Not recommended	Yes	123	10	No	No	No	No	Dead (attributable to this cancer dx)	5	Dead	One primary only	76	5365663
Other (American Indian/AK Native, Asian/Pacific Islander)	Male	8170	T1	N0	36	No radiation and/or cancer-directed surgery	Surgery performed	No/Unknown	140	20	No	No	No	No	Dead (attributable to this cancer dx)	52	Dead	One primary only	64	5365939
White	Male	8174	T2	N0	36	No radiation and/or cancer-directed surgery	Surgery performed	No/Unknown	94	10	No	No	No	No	Alive or dead of other cause	71	Alive	One primary only	59	5366088
White	Male	8170	T1	N0	61	No radiation and/or cancer-directed surgery	Surgery performed	Yes	28	998	No	No	No	No	Alive or dead of other cause	71	Alive	One primary only	63	5366217
Black	Male	8170	T3b	N1	0	No radiation and/or cancer-directed surgery	Not recommended	No/Unknown	999	10	No	No	No	No	Dead (attributable to this cancer dx)	1	Dead	One primary only	61	5366265
Other (American Indian/AK Native, Asian/Pacific Islander)	Male	8170	T1	N0	36	No radiation and/or cancer-directed surgery	Surgery performed	No/Unknown	21	10	No	No	No	No	Alive or dead of other cause	69	Alive	One primary only	66	5366316
Other (American Indian/AK Native, Asian/Pacific Islander)	Male	8170	T1	N0	0	No radiation and/or cancer-directed surgery	Not recommended	Yes	66	20	No	No	No	No	Alive or dead of other cause	32	Dead	One primary only	65	5366449
Black	Male	8170	T3a	N0	0	No radiation and/or cancer-directed surgery	Not recommended	No/Unknown	57	10	No	No	No	No	Alive or dead of other cause	68	Alive	One primary only	60	5366557
Other (American Indian/AK Native, Asian/Pacific Islander)	Female	8170	T3a	N0	16	No radiation and/or cancer-directed surgery	Surgery performed	Yes	56	10	No	No	No	No	Alive or dead of other cause	32	Dead	One primary only	62	5366816
Other (American Indian/AK Native, Asian/Pacific Islander)	Male	8170	TX	NX	0	No radiation and/or cancer-directed surgery	Not recommended	No/Unknown	130	10	Yes	No	No	Yes	Dead (attributable to this cancer dx)	3	Dead	One primary only	48	5366948
White	Male	8170	T1	N0	0	No radiation and/or cancer-directed surgery	Not recommended	Yes	15	10	No	No	No	No	Alive or dead of other cause	68	Alive	One primary only	52	5367151
Other (American Indian/AK Native, Asian/Pacific Islander)	Male	8170	T3a	N0	0	No radiation and/or cancer-directed surgery	Not recommended	Yes	51	10	No	No	No	No	Alive or dead of other cause	43	Dead	One primary only	74	5367154
Other (American Indian/AK Native, Asian/Pacific Islander)	Male	8170	T3b	N1	0	No radiation and/or cancer-directed surgery	Not recommended	No/Unknown	160	10	No	No	No	No	Dead (attributable to this cancer dx)	1	Dead	One primary only	54	5367194
White	Male	8170	T1	N0	0	No radiation and/or cancer-directed surgery	Not recommended, contraindicated due to other cond; autopsy only (1973-2002)	No/Unknown	30	20	No	No	No	No	Alive or dead of other cause	0	Dead	One primary only	73	5367197
Other (American Indian/AK Native, Asian/Pacific Islander)	Male	8170	T3a	N0	0	No radiation and/or cancer-directed surgery	Not recommended	Yes	99	10	No	No	No	No	Alive or dead of other cause	48	Alive	One primary only	57	5367406
Other (American Indian/AK Native, Asian/Pacific Islander)	Male	8170	T2	N0	0	No radiation and/or cancer-directed surgery	Not recommended	Yes	12	20	No	No	No	No	Dead (attributable to this cancer dx)	20	Dead	One primary only	62	5367496
Other (American Indian/AK Native, Asian/Pacific Islander)	Male	8170	T2	N0	0	No radiation and/or cancer-directed surgery	Not recommended	Yes	15	20	No	No	No	No	Alive or dead of other cause	64	Alive	One primary only	72	5367498
White	Male	8170	T1	N0	0	No radiation and/or cancer-directed surgery	Not recommended	Yes	36	20	No	No	No	No	Alive or dead of other cause	6	Dead	1st of 2 or more primaries	60	5367552
White	Male	8170	T3b	N0	0	No radiation and/or cancer-directed surgery	Not recommended	Yes	990	10	No	No	No	No	Dead (attributable to this cancer dx)	25	Dead	One primary only	62	5368225
Black	Male	8170	T3b	N1	0	No radiation and/or cancer-directed surgery	Not recommended	Yes	98	10	No	No	No	No	Dead (attributable to this cancer dx)	15	Dead	One primary only	52	5368330
Other (American Indian/AK Native, Asian/Pacific Islander)	Male	8170	T1	N0	23	No radiation and/or cancer-directed surgery	Surgery performed	No/Unknown	15	10	No	No	No	No	Dead (attributable to this cancer dx)	34	Dead	One primary only	35	5368640
Black	Male	8170	T1	N0	10	No radiation and/or cancer-directed surgery	Surgery performed	No/Unknown	42	10	No	No	No	No	Dead (attributable to this cancer dx)	4	Dead	One primary only	60	5368646
White	Female	8170	T1	N0	0	No radiation and/or cancer-directed surgery	Not recommended	Yes	60	10	No	No	No	No	Dead (attributable to this cancer dx)	6	Dead	One primary only	57	5368783
White	Male	8170	T3b	NX	0	No radiation and/or cancer-directed surgery	Not recommended	Yes	999	10	No	No	No	No	Dead (attributable to this cancer dx)	5	Dead	One primary only	76	5368817
White	Male	8170	T1	N0	20	No radiation and/or cancer-directed surgery	Surgery performed	No/Unknown	45	10	No	No	No	No	Alive or dead of other cause	62	Alive	One primary only	71	5368869
Other (American Indian/AK Native, Asian/Pacific Islander)	Female	8170	T3b	N0	0	No radiation and/or cancer-directed surgery	Not recommended	No/Unknown	46	10	No	No	No	No	Dead (attributable to this cancer dx)	1	Dead	One primary only	74	5369045
White	Female	8170	T3b	N0	0	No radiation and/or cancer-directed surgery	Not recommended	Yes	70	10	No	No	No	No	Dead (attributable to this cancer dx)	4	Dead	One primary only	59	5369311
White	Male	8170	T2	N0	0	No radiation and/or cancer-directed surgery	Not recommended	Yes	90	10	No	No	No	No	Dead (attributable to this cancer dx)	1	Dead	One primary only	85	5369425
White	Male	8170	T2	N0	0	No radiation and/or cancer-directed surgery	Not recommended	No/Unknown	999	998	No	No	No	No	Dead (attributable to this cancer dx)	0	Dead	One primary only	81	5369428
Black	Male	8170	T4	N0	0	No radiation and/or cancer-directed surgery	Recommended but not performed, unknown reason	Yes	66	10	No	No	No	No	Dead (attributable to this cancer dx)	7	Dead	One primary only	63	5369630
Other (American Indian/AK Native, Asian/Pacific Islander)	Female	8170	T1	N0	0	No radiation and/or cancer-directed surgery	Not recommended	Yes	87	10	No	No	No	No	Alive or dead of other cause	5	Dead	One primary only	75	5369798
White	Male	8170	T1	N0	61	No radiation and/or cancer-directed surgery	Surgery performed	Yes	30	20	No	No	No	No	Alive or dead of other cause	70	Alive	One primary only	49	5369965
Other (American Indian/AK Native, Asian/Pacific Islander)	Female	8170	T1	N0	0	No radiation and/or cancer-directed surgery	Not recommended	No/Unknown	26	10	No	No	No	No	Alive or dead of other cause	5	Dead	One primary only	84	5370448
White	Male	8170	T1	N0	0	No radiation and/or cancer-directed surgery	Not recommended	Yes	60	10	No	No	No	No	Alive or dead of other cause	67	Alive	One primary only	57	5370598
White	Male	8170	T3a	N1	0	No radiation and/or cancer-directed surgery	Not recommended	No/Unknown	999	999	No	No	No	Yes	Dead (attributable to this cancer dx)	2	Dead	One primary only	87	5370700
White	Male	8170	T2	N0	0	No radiation and/or cancer-directed surgery	Not recommended	Yes	15	20	No	No	No	No	Alive or dead of other cause	20	Dead	One primary only	63	5370821
White	Male	8170	T2	N0	0	No radiation and/or cancer-directed surgery	Not recommended	Yes	42	10	No	No	No	No	Dead (attributable to this cancer dx)	30	Dead	One primary only	49	5370824
White	Male	8170	TX	N0	22	No radiation and/or cancer-directed surgery	Surgery performed	No/Unknown	999	10	No	No	No	No	Dead (attributable to this cancer dx)	4	Dead	One primary only	61	5370907
White	Male	8170	T2	N0	21	No radiation and/or cancer-directed surgery	Surgery performed	Yes	131	20	No	No	No	No	Dead (attributable to this cancer dx)	5	Dead	One primary only	75	5370954
White	Female	8170	TX	NX	0	No radiation and/or cancer-directed surgery	Not recommended	Yes	999	10	Yes	No	Yes	Yes	Dead (attributable to this cancer dx)	3	Dead	One primary only	61	5371172
Other (American Indian/AK Native, Asian/Pacific Islander)	Male	8170	TX	N0	0	No radiation and/or cancer-directed surgery	Not recommended	No/Unknown	999	10	No	No	No	No	Dead (attributable to this cancer dx)	3	Dead	One primary only	42	5371180
Other (American Indian/AK Native, Asian/Pacific Islander)	Male	8170	T1	N0	21	No radiation and/or cancer-directed surgery	Surgery performed	No/Unknown	50	10	No	No	No	No	Alive or dead of other cause	62	Alive	One primary only	74	5371282
White	Male	8170	T1	N0	0	No radiation and/or cancer-directed surgery	Not recommended	No/Unknown	142	999	No	No	No	Yes	Dead (attributable to this cancer dx)	10	Dead	One primary only	96	5371548
Other (American Indian/AK Native, Asian/Pacific Islander)	Male	8170	T3a	N0	0	No radiation and/or cancer-directed surgery	Not recommended	No/Unknown	93	10	No	No	No	No	Dead (attributable to this cancer dx)	2	Dead	One primary only	73	5371747
White	Male	8170	T4	N0	0	No radiation and/or cancer-directed surgery	Not recommended	No/Unknown	60	10	No	No	No	No	Dead (attributable to this cancer dx)	0	Dead	One primary only	55	5371949
White	Female	8170	T2	N0	0	No radiation and/or cancer-directed surgery	Not recommended	No/Unknown	29	20	No	No	No	No	Dead (attributable to this cancer dx)	4	Dead	One primary only	81	5371975
White	Male	8170	T1	N0	24	No radiation and/or cancer-directed surgery	Surgery performed	No/Unknown	50	20	No	No	No	No	Alive or dead of other cause	70	Alive	One primary only	67	5372061
Other (American Indian/AK Native, Asian/Pacific Islander)	Female	8170	T1	N0	0	No radiation and/or cancer-directed surgery	Not recommended	Yes	28	10	No	No	No	No	Alive or dead of other cause	68	Alive	One primary only	50	5372063
White	Male	8170	T3b	N0	0	No radiation and/or cancer-directed surgery	Not recommended	No/Unknown	49	10	No	No	No	No	Dead (attributable to this cancer dx)	1	Dead	One primary only	58	5372302
Other (American Indian/AK Native, Asian/Pacific Islander)	Male	8170	T1	N0	15	No radiation and/or cancer-directed surgery	Surgery performed	No/Unknown	20	20	No	No	No	No	Alive or dead of other cause	64	Alive	One primary only	52	5372419
White	Female	8170	T1	N0	0	No radiation and/or cancer-directed surgery	Recommended, unknown if performed	No/Unknown	16	20	No	No	No	No	Dead (attributable to this cancer dx)	23	Dead	One primary only	80	5372456
White	Female	8170	T1	N0	0	No radiation and/or cancer-directed surgery	Not recommended, contraindicated due to other cond; autopsy only (1973-2002)	No/Unknown	115	20	No	No	No	No	Dead (attributable to this cancer dx)	3	Dead	One primary only	78	5372582
Other (American Indian/AK Native, Asian/Pacific Islander)	Male	8170	T3b	N0	0	No radiation and/or cancer-directed surgery	Not recommended	Yes	49	10	No	No	No	No	Dead (attributable to this cancer dx)	44	Dead	One primary only	51	5372733
Other (American Indian/AK Native, Asian/Pacific Islander)	Male	8170	T3b	N0	0	No radiation and/or cancer-directed surgery	Not recommended	No/Unknown	94	999	No	No	No	No	Dead (attributable to this cancer dx)	3	Dead	One primary only	52	5372735
Other (American Indian/AK Native, Asian/Pacific Islander)	Male	8170	T1	N0	16	No radiation and/or cancer-directed surgery	Surgery performed	No/Unknown	20	10	No	No	No	No	Dead (attributable to this cancer dx)	31	Dead	One primary only	58	5372738
White	Male	8170	T2	N0	0	No radiation and/or cancer-directed surgery	Not recommended	Yes	39	10	No	No	No	No	Dead (attributable to this cancer dx)	16	Dead	One primary only	72	5372789
Black	Male	8170	T3b	N1	0	No radiation and/or cancer-directed surgery	Not recommended	No/Unknown	66	10	No	No	No	No	Dead (attributable to this cancer dx)	2	Dead	One primary only	58	5372877
Black	Male	8170	T1	N0	0	No radiation and/or cancer-directed surgery	Not recommended	No/Unknown	999	10	No	No	No	Yes	Dead (attributable to this cancer dx)	0	Dead	One primary only	66	5372885
Other (American Indian/AK Native, Asian/Pacific Islander)	Male	8170	T3a	NX	0	No radiation and/or cancer-directed surgery	Not recommended	Yes	54	10	No	No	No	No	Dead (attributable to this cancer dx)	27	Dead	One primary only	60	5372888
Other (American Indian/AK Native, Asian/Pacific Islander)	Male	8171	T3a	N0	0	No radiation and/or cancer-directed surgery	Not recommended	No/Unknown	129	10	No	No	No	No	Dead (attributable to this cancer dx)	0	Dead	One primary only	87	5372891
Other (American Indian/AK Native, Asian/Pacific Islander)	Male	8170	T2	N0	0	No radiation and/or cancer-directed surgery	Not recommended	Yes	31	20	No	No	No	No	Alive or dead of other cause	38	Dead	1st of 2 or more primaries	74	5372893
Other (American Indian/AK Native, Asian/Pacific Islander)	Male	8170	T1	N0	21	No radiation and/or cancer-directed surgery	Surgery performed	No/Unknown	30	20	No	No	No	No	Dead (attributable to this cancer dx)	3	Dead	One primary only	64	5372896
White	Male	8170	T2	N0	0	No radiation and/or cancer-directed surgery	Not recommended	Yes	27	20	No	No	No	No	Dead (attributable to this cancer dx)	16	Dead	One primary only	56	5373174
White	Male	8170	TX	NX	0	No radiation and/or cancer-directed surgery	Not recommended	Yes	999	999	Yes	No	Yes	No	Dead (attributable to this cancer dx)	4	Dead	One primary only	72	5373248
White	Male	8170	T3b	N0	0	No radiation and/or cancer-directed surgery	Not recommended	No/Unknown	20	10	No	No	No	No	Dead (attributable to this cancer dx)	4	Dead	One primary only	57	5373470
White	Female	8170	T1	N0	0	No radiation and/or cancer-directed surgery	Not recommended	Yes	20	20	No	No	No	No	Alive or dead of other cause	59	Dead	One primary only	71	5373531
Other (American Indian/AK Native, Asian/Pacific Islander)	Female	8170	T1	N0	16	No radiation and/or cancer-directed surgery	Surgery performed	No/Unknown	26	20	No	No	No	No	Alive or dead of other cause	69	Alive	One primary only	73	5373601
White	Male	8170	T3b	N0	0	No radiation and/or cancer-directed surgery	Not recommended	No/Unknown	999	999	No	No	No	No	Dead (attributable to this cancer dx)	0	Dead	One primary only	61	5373651
Other (American Indian/AK Native, Asian/Pacific Islander)	Male	8170	T3b	N0	26	Radiation after surgery	Surgery performed	No/Unknown	68	10	No	No	No	No	Dead (attributable to this cancer dx)	10	Dead	One primary only	80	5373721
White	Male	8170	T1	N0	0	No radiation and/or cancer-directed surgery	Not recommended	Yes	25	20	No	No	No	No	Alive or dead of other cause	65	Alive	One primary only	52	5373762
White	Male	8170	T1	N0	0	No radiation and/or cancer-directed surgery	Not recommended	Yes	5	10	No	No	No	No	Alive or dead of other cause	64	Alive	One primary only	56	5373764
Other (American Indian/AK Native, Asian/Pacific Islander)	Female	8170	T2	N0	37	No radiation and/or cancer-directed surgery	Surgery performed	No/Unknown	98	10	No	No	No	No	Dead (attributable to this cancer dx)	22	Dead	One primary only	80	5374018
White	Male	8170	T1	N0	16	No radiation and/or cancer-directed surgery	Surgery performed	No/Unknown	10	10	No	No	No	No	Alive or dead of other cause	63	Alive	One primary only	53	5374053
White	Male	8170	T1	N0	0	No radiation and/or cancer-directed surgery	Not recommended	Yes	999	10	No	No	No	No	Alive or dead of other cause	46	Dead	One primary only	73	5374366
Other (American Indian/AK Native, Asian/Pacific Islander)	Female	8170	T1	N0	23	No radiation and/or cancer-directed surgery	Surgery performed	No/Unknown	26	10	No	No	No	No	Alive or dead of other cause	61	Alive	One primary only	63	5374489
Other (American Indian/AK Native, Asian/Pacific Islander)	Male	8170	T1	N0	0	No radiation and/or cancer-directed surgery	Not recommended	Yes	33	20	No	No	No	No	Dead (attributable to this cancer dx)	24	Dead	One primary only	56	5374640
Other (American Indian/AK Native, Asian/Pacific Islander)	Male	8170	T1	N0	0	No radiation and/or cancer-directed surgery	Not recommended	Yes	999	10	No	No	No	Yes	Dead (attributable to this cancer dx)	35	Dead	One primary only	55	5374730
Other (American Indian/AK Native, Asian/Pacific Islander)	Male	8170	T1	NX	0	No radiation and/or cancer-directed surgery	Not recommended	No/Unknown	999	10	No	No	No	No	Dead (attributable to this cancer dx)	0	Dead	One primary only	72	5374746
White	Male	8170	T1	N0	61	No radiation and/or cancer-directed surgery	Surgery performed	Yes	47	20	No	No	No	No	Alive or dead of other cause	68	Alive	One primary only	59	5374835
Other (American Indian/AK Native, Asian/Pacific Islander)	Female	8170	T2	N0	36	No radiation and/or cancer-directed surgery	Surgery performed	No/Unknown	117	10	No	No	No	No	Alive or dead of other cause	36	Alive	One primary only	67	5374872
Other (American Indian/AK Native, Asian/Pacific Islander)	Male	8170	T3a	N0	0	No radiation and/or cancer-directed surgery	Not recommended	No/Unknown	52	10	No	No	No	No	Dead (attributable to this cancer dx)	25	Dead	1st of 2 or more primaries	40	5374873
White	Male	8170	T3a	N0	0	No radiation and/or cancer-directed surgery	Not recommended, contraindicated due to other cond; autopsy only (1973-2002)	No/Unknown	120	10	No	No	No	Yes	Dead (attributable to this cancer dx)	0	Dead	One primary only	87	5374989
White	Male	8170	T3a	N0	0	No radiation and/or cancer-directed surgery	Not recommended	No/Unknown	56	10	No	No	No	No	Dead (attributable to this cancer dx)	3	Dead	One primary only	67	5375052
White	Male	8170	T1	N0	61	No radiation and/or cancer-directed surgery	Surgery performed	No/Unknown	47	20	No	No	No	No	Dead (attributable to this cancer dx)	49	Dead	1st of 2 or more primaries	60	5375141
White	Male	8170	T1	N0	0	No radiation and/or cancer-directed surgery	Not recommended	No/Unknown	50	20	No	No	No	No	Dead (attributable to this cancer dx)	6	Dead	One primary only	61	5375283
Other (American Indian/AK Native, Asian/Pacific Islander)	Male	8170	T1	N0	0	No radiation and/or cancer-directed surgery	Not recommended	Yes	32	10	No	No	No	No	Dead (attributable to this cancer dx)	49	Dead	One primary only	57	5375404
White	Male	8170	T1	N0	0	No radiation and/or cancer-directed surgery	Not recommended	Yes	24	10	No	No	No	No	Alive or dead of other cause	9	Dead	One primary only	54	5375445
Other (American Indian/AK Native, Asian/Pacific Islander)	Male	8170	TX	N0	0	No radiation and/or cancer-directed surgery	Not recommended	No/Unknown	999	10	No	No	No	No	Dead (attributable to this cancer dx)	0	Dead	One primary only	80	5375516
Other (American Indian/AK Native, Asian/Pacific Islander)	Male	8170	T1	N0	36	No radiation and/or cancer-directed surgery	Surgery performed	No/Unknown	44	999	No	No	No	No	Alive or dead of other cause	66	Alive	One primary only	72	5375652
Other (American Indian/AK Native, Asian/Pacific Islander)	Male	8170	T1	N0	24	No radiation and/or cancer-directed surgery	Surgery performed	No/Unknown	40	10	No	No	No	No	Alive or dead of other cause	69	Alive	One primary only	57	5375653
White	Male	8170	T4	N1	0	No radiation and/or cancer-directed surgery	Recommended but not performed, unknown reason	No/Unknown	999	10	No	No	No	No	Dead (attributable to this cancer dx)	3	Dead	One primary only	64	5375709
Black	Male	8170	T1	N0	0	No radiation and/or cancer-directed surgery	Recommended but not performed, unknown reason	Yes	50	20	No	No	No	No	Alive or dead of other cause	35	Dead	One primary only	66	5375752
White	Male	8170	T1	N0	0	No radiation and/or cancer-directed surgery	Recommended but not performed, unknown reason	No/Unknown	28	10	No	No	No	No	Dead (attributable to this cancer dx)	44	Dead	One primary only	61	5375794
Black	Male	8170	T2	N0	0	No radiation and/or cancer-directed surgery	Recommended but not performed, unknown reason	Yes	50	20	No	No	No	No	Alive or dead of other cause	1	Dead	One primary only	61	5375800
Black	Male	8170	T2	NX	0	No radiation and/or cancer-directed surgery	Recommended but not performed, unknown reason	No/Unknown	999	10	No	No	No	No	Dead (attributable to this cancer dx)	1	Dead	One primary only	67	5375832
Black	Male	8170	T1	N0	36	No radiation and/or cancer-directed surgery	Surgery performed	No/Unknown	72	10	No	No	No	No	Dead (attributable to this cancer dx)	6	Dead	One primary only	61	5375854
Black	Male	8170	T1	N0	36	No radiation and/or cancer-directed surgery	Surgery performed	No/Unknown	180	10	No	No	No	No	Dead (attributable to this cancer dx)	51	Dead	One primary only	63	5375962
White	Male	8170	T3a	N0	0	No radiation and/or cancer-directed surgery	Not recommended	Yes	56	10	No	No	No	No	Alive or dead of other cause	42	Dead	One primary only	62	5375985
White	Male	8170	T4	N0	0	No radiation and/or cancer-directed surgery	Not recommended	Yes	90	10	No	No	No	No	Dead (attributable to this cancer dx)	38	Dead	One primary only	73	5376076
Other (American Indian/AK Native, Asian/Pacific Islander)	Male	8170	T1	N0	37	No radiation and/or cancer-directed surgery	Surgery performed	No/Unknown	85	10	No	No	No	No	Dead (attributable to this cancer dx)	16	Dead	One primary only	45	5376141
White	Female	8170	T1	N0	0	No radiation and/or cancer-directed surgery	Not recommended	Yes	14	10	No	No	No	No	Alive or dead of other cause	68	Alive	One primary only	68	5376175
White	Male	8170	TX	NX	0	No radiation and/or cancer-directed surgery	Recommended but not performed, patient refused	No/Unknown	999	999	No	No	Yes	Yes	Dead (attributable to this cancer dx)	0	Dead	One primary only	49	5376337
Other (American Indian/AK Native, Asian/Pacific Islander)	Male	8170	T1	N0	0	No radiation and/or cancer-directed surgery	Not recommended	Yes	45	999	No	No	No	No	Alive or dead of other cause	22	Dead	One primary only	45	5376497
White	Male	8170	TX	N0	0	No radiation and/or cancer-directed surgery	Not recommended	Yes	999	999	No	No	No	No	Dead (attributable to this cancer dx)	18	Dead	One primary only	55	5376500
Other (American Indian/AK Native, Asian/Pacific Islander)	Female	8170	T1	N0	0	No radiation and/or cancer-directed surgery	Not recommended	Yes	30	10	No	No	No	No	Dead (attributable to this cancer dx)	23	Dead	One primary only	78	5376729
Other (American Indian/AK Native, Asian/Pacific Islander)	Male	8170	T1	N0	16	No radiation and/or cancer-directed surgery	Surgery performed	Yes	29	10	No	No	No	No	Dead (attributable to this cancer dx)	62	Dead	One primary only	83	5376799
White	Male	8170	T2	N0	0	No radiation and/or cancer-directed surgery	Not recommended	Yes	32	10	No	No	No	No	Dead (attributable to this cancer dx)	17	Dead	One primary only	73	5376840
White	Male	8170	T1	N0	0	No radiation and/or cancer-directed surgery	Not recommended	Yes	10	20	No	No	No	No	Alive or dead of other cause	69	Alive	One primary only	42	5376850
White	Male	8170	T2	N0	0	No radiation and/or cancer-directed surgery	Not recommended	Yes	29	998	No	No	No	No	Dead (attributable to this cancer dx)	13	Dead	One primary only	53	5376854
White	Male	8170	TX	N0	0	No radiation and/or cancer-directed surgery	Not recommended	Yes	999	999	No	No	No	No	Alive or dead of other cause	62	Alive	One primary only	48	5377196
Black	Male	8170	T2	N0	16	No radiation and/or cancer-directed surgery	Surgery performed	Yes	35	10	No	No	No	No	Alive or dead of other cause	27	Dead	One primary only	65	5377632
Other (American Indian/AK Native, Asian/Pacific Islander)	Female	8170	T1	N0	61	No radiation and/or cancer-directed surgery	Surgery performed	Yes	31	10	No	No	No	No	Alive or dead of other cause	62	Alive	One primary only	43	5377682
Other (American Indian/AK Native, Asian/Pacific Islander)	Male	8170	T2	N0	0	No radiation and/or cancer-directed surgery	Recommended but not performed, patient refused	Yes	42	10	No	No	No	No	Alive or dead of other cause	65	Alive	One primary only	64	5377707
Other (American Indian/AK Native, Asian/Pacific Islander)	Male	8170	T4	N0	0	No radiation and/or cancer-directed surgery	Not recommended	No/Unknown	40	10	No	No	No	No	Dead (attributable to this cancer dx)	1	Dead	One primary only	64	5378114
Black	Male	8170	TX	N0	0	No radiation and/or cancer-directed surgery	Not recommended	No/Unknown	999	20	No	No	No	No	Alive or dead of other cause	1	Dead	One primary only	60	5378498
White	Male	8170	T2	N0	0	No radiation and/or cancer-directed surgery	Not recommended	Yes	30	20	No	No	No	No	Dead (attributable to this cancer dx)	56	Dead	1st of 2 or more primaries	61	5378638
Other (American Indian/AK Native, Asian/Pacific Islander)	Female	8170	T1	N0	0	No radiation and/or cancer-directed surgery	Not recommended	Yes	16	10	No	No	No	No	Dead (attributable to this cancer dx)	22	Dead	One primary only	71	5378688
White	Male	8170	T1	N0	0	No radiation and/or cancer-directed surgery	Not recommended	Yes	27	10	No	No	No	No	Alive or dead of other cause	64	Alive	One primary only	56	5378691
Other (American Indian/AK Native, Asian/Pacific Islander)	Male	8170	T1	N0	0	No radiation and/or cancer-directed surgery	Not recommended	Yes	47	10	No	No	No	No	Alive or dead of other cause	65	Alive	One primary only	45	5378694
White	Female	8170	T1	N0	0	No radiation and/or cancer-directed surgery	Not recommended	Yes	11	20	No	No	No	No	Alive or dead of other cause	37	Alive	One primary only	73	5378712
Other (American Indian/AK Native, Asian/Pacific Islander)	Male	8170	T1	N0	61	No radiation and/or cancer-directed surgery	Surgery performed	No/Unknown	25	10	No	No	No	No	Alive or dead of other cause	66	Alive	One primary only	54	5378728
White	Female	8170	T1	N0	16	No radiation and/or cancer-directed surgery	Surgery performed	Yes	25	10	No	No	No	No	Dead (attributable to this cancer dx)	49	Dead	One primary only	77	5378764
Black	Male	8170	T1	N0	0	No radiation and/or cancer-directed surgery	Not recommended	Yes	36	10	No	No	No	No	Alive or dead of other cause	17	Dead	One primary only	54	5378770
White	Female	8170	T2	N0	0	No radiation and/or cancer-directed surgery	Not recommended	Yes	27	10	No	No	No	No	Dead (attributable to this cancer dx)	17	Dead	One primary only	75	5378893
Black	Male	8170	T1	N0	0	No radiation and/or cancer-directed surgery	Not recommended	Yes	14	20	No	No	No	No	Alive or dead of other cause	70	Alive	One primary only	58	5379061
White	Male	8170	T1	N0	16	No radiation and/or cancer-directed surgery	Surgery performed	Yes	18	10	No	No	No	No	Alive or dead of other cause	60	Alive	One primary only	60	5379180
Other (American Indian/AK Native, Asian/Pacific Islander)	Male	8170	T2	N0	61	No radiation and/or cancer-directed surgery	Surgery performed	Yes	20	20	No	No	No	No	Alive or dead of other cause	64	Alive	One primary only	58	5379182
White	Female	8170	T2	N0	0	No radiation and/or cancer-directed surgery	Not recommended	Yes	20	10	No	No	No	No	Alive or dead of other cause	61	Alive	One primary only	54	5379288
White	Male	8170	T1	N0	16	No radiation and/or cancer-directed surgery	Surgery performed	No/Unknown	19	10	No	No	No	No	Alive or dead of other cause	65	Alive	One primary only	60	5379444
White	Female	8170	T2	NX	0	No radiation and/or cancer-directed surgery	Not recommended	Yes	44	10	No	No	No	Yes	Dead (attributable to this cancer dx)	35	Dead	One primary only	79	5379520
White	Male	8170	T1	N0	25	No radiation and/or cancer-directed surgery	Surgery performed	No/Unknown	88	20	No	No	No	No	Alive or dead of other cause	63	Alive	One primary only	38	5379728
White	Male	8170	T1	N0	0	No radiation and/or cancer-directed surgery	Recommended but not performed, unknown reason	No/Unknown	21	10	No	No	No	No	Alive or dead of other cause	5	Dead	One primary only	67	5379808
White	Male	8170	T1	N0	0	No radiation and/or cancer-directed surgery	Not recommended	Yes	17	10	No	No	No	No	Dead (attributable to this cancer dx)	37	Dead	One primary only	56	5379819
White	Male	8170	TX	N0	0	No radiation and/or cancer-directed surgery	Not recommended	Yes	999	999	No	No	No	No	Dead (attributable to this cancer dx)	41	Dead	One primary only	62	5379821
White	Male	8170	T3a	N0	0	No radiation and/or cancer-directed surgery	Not recommended	No/Unknown	60	10	No	No	No	No	Dead (attributable to this cancer dx)	55	Dead	One primary only	59	5379828
Other (American Indian/AK Native, Asian/Pacific Islander)	Female	8170	T2	N0	16	No radiation and/or cancer-directed surgery	Surgery performed	No/Unknown	30	10	No	No	No	No	Dead (attributable to this cancer dx)	59	Dead	One primary only	58	5379843
Other (American Indian/AK Native, Asian/Pacific Islander)	Male	8170	T1	N0	0	No radiation and/or cancer-directed surgery	Not recommended	No/Unknown	999	998	No	No	Yes	Yes	Dead (attributable to this cancer dx)	2	Dead	One primary only	64	5379852
Black	Male	8170	T3a	N0	0	No radiation and/or cancer-directed surgery	Not recommended	Yes	60	999	No	No	No	No	Dead (attributable to this cancer dx)	36	Dead	One primary only	68	5380190
Other (American Indian/AK Native, Asian/Pacific Islander)	Female	8170	T1	N0	0	No radiation and/or cancer-directed surgery	Not recommended	No/Unknown	999	10	No	No	No	No	Dead (attributable to this cancer dx)	19	Dead	One primary only	80	5380191
White	Female	8170	TX	N0	0	No radiation and/or cancer-directed surgery	Not recommended	No/Unknown	999	998	No	No	No	No	Dead (attributable to this cancer dx)	0	Dead	One primary only	47	5380816
Other (American Indian/AK Native, Asian/Pacific Islander)	Male	8170	T3a	N0	0	No radiation and/or cancer-directed surgery	Not recommended	Yes	82	10	No	No	No	No	Dead (attributable to this cancer dx)	15	Dead	One primary only	56	5380817
White	Male	8170	T1	N0	0	No radiation and/or cancer-directed surgery	Not recommended	No/Unknown	15	10	No	No	No	No	Alive or dead of other cause	60	Alive	One primary only	57	5380825
White	Female	8170	T1	N1	0	No radiation and/or cancer-directed surgery	Not recommended	No/Unknown	122	999	No	No	No	No	Dead (attributable to this cancer dx)	3	Dead	One primary only	72	5381034
White	Male	8170	T4	N0	0	No radiation and/or cancer-directed surgery	Not recommended	No/Unknown	760	998	No	No	No	Yes	Dead (attributable to this cancer dx)	0	Dead	One primary only	63	5381053
White	Male	8170	T2	N0	0	No radiation and/or cancer-directed surgery	Not recommended	Yes	43	10	No	No	No	No	Dead (attributable to this cancer dx)	6	Dead	One primary only	66	5381265
White	Female	8170	T2	N0	0	No radiation and/or cancer-directed surgery	Not recommended	Yes	40	999	No	No	No	No	Dead (attributable to this cancer dx)	17	Dead	One primary only	51	5381317
Other (American Indian/AK Native, Asian/Pacific Islander)	Female	8170	TX	NX	0	No radiation and/or cancer-directed surgery	Not recommended	No/Unknown	999	20	No	No	No	No	Dead (attributable to this cancer dx)	31	Dead	One primary only	82	5381338
Other (American Indian/AK Native, Asian/Pacific Islander)	Male	8170	T3b	N0	0	No radiation and/or cancer-directed surgery	Not recommended	No/Unknown	11	10	Yes	No	No	No	Dead (attributable to this cancer dx)	0	Dead	One primary only	71	5381718
White	Female	8170	T1	N0	16	No radiation and/or cancer-directed surgery	Surgery performed	No/Unknown	999	998	No	No	No	No	Alive or dead of other cause	63	Alive	One primary only	63	5381982
White	Male	8170	T3a	N1	0	No radiation and/or cancer-directed surgery	Not recommended	No/Unknown	110	10	No	No	No	No	Dead (attributable to this cancer dx)	0	Dead	One primary only	76	5382287
Other (American Indian/AK Native, Asian/Pacific Islander)	Male	8170	T1	N0	0	No radiation and/or cancer-directed surgery	Not recommended	Yes	999	10	No	No	No	No	Dead (attributable to this cancer dx)	2	Dead	One primary only	57	5382506
White	Male	8170	TX	N0	0	No radiation and/or cancer-directed surgery	Not recommended	Yes	40	10	No	No	No	No	Dead (attributable to this cancer dx)	56	Dead	One primary only	72	5382532
Black	Female	8170	T2	N0	0	No radiation and/or cancer-directed surgery	Not recommended	No/Unknown	50	10	No	No	No	No	Dead (attributable to this cancer dx)	0	Dead	One primary only	68	5382603
Other (American Indian/AK Native, Asian/Pacific Islander)	Female	8170	TX	N1	0	No radiation and/or cancer-directed surgery	Not recommended	Yes	999	999	No	No	No	No	Alive or dead of other cause	33	Dead	One primary only	71	5382657
Other (American Indian/AK Native, Asian/Pacific Islander)	Male	8170	T2	N0	0	No radiation and/or cancer-directed surgery	Not recommended	Yes	22	10	No	No	No	No	Alive or dead of other cause	59	Dead	One primary only	55	5382664
Other (American Indian/AK Native, Asian/Pacific Islander)	Female	8170	T3a	N0	0	No radiation and/or cancer-directed surgery	Not recommended	Yes	52	20	No	No	No	No	Dead (attributable to this cancer dx)	31	Dead	One primary only	86	5382696
Other (American Indian/AK Native, Asian/Pacific Islander)	Male	8170	T4	N1	0	No radiation and/or cancer-directed surgery	Not recommended, contraindicated due to other cond; autopsy only (1973-2002)	No/Unknown	120	10	No	No	No	No	Dead (attributable to this cancer dx)	4	Dead	One primary only	67	5382703
White	Male	8170	T2	N0	20	No radiation and/or cancer-directed surgery	Surgery performed	No/Unknown	49	20	No	No	No	No	Dead (attributable to this cancer dx)	42	Dead	One primary only	60	5383023
Other (American Indian/AK Native, Asian/Pacific Islander)	Male	8170	T2	N0	51	No radiation and/or cancer-directed surgery	Surgery performed	Yes	41	10	No	No	No	No	Alive or dead of other cause	35	Dead	One primary only	68	5383031
White	Male	8170	T1	N0	16	No radiation and/or cancer-directed surgery	Surgery performed	No/Unknown	28	20	No	No	No	No	Dead (attributable to this cancer dx)	12	Dead	One primary only	65	5383367
White	Male	8170	T2	N0	0	No radiation and/or cancer-directed surgery	Not recommended	Yes	999	10	No	No	No	No	Dead (attributable to this cancer dx)	2	Dead	One primary only	62	5383390
White	Male	8170	T1	N1	0	No radiation and/or cancer-directed surgery	Recommended, unknown if performed	Yes	37	20	No	No	No	No	Alive or dead of other cause	63	Alive	One primary only	63	5383483
Other (American Indian/AK Native, Asian/Pacific Islander)	Male	8170	T1	N0	21	No radiation and/or cancer-directed surgery	Surgery performed	No/Unknown	40	999	No	No	No	No	Dead (attributable to this cancer dx)	36	Dead	One primary only	71	5383598
Other (American Indian/AK Native, Asian/Pacific Islander)	Male	8170	T3a	N0	0	No radiation and/or cancer-directed surgery	Not recommended	No/Unknown	128	10	No	No	No	Yes	Dead (attributable to this cancer dx)	1	Dead	One primary only	55	5383647
Other (American Indian/AK Native, Asian/Pacific Islander)	Male	8170	T1	N0	26	No radiation and/or cancer-directed surgery	Surgery performed	No/Unknown	999	998	No	No	No	No	Dead (attributable to this cancer dx)	0	Dead	One primary only	43	5383943
Black	Male	8170	T3b	N0	0	No radiation and/or cancer-directed surgery	Not recommended	Yes	63	10	Yes	No	No	No	Dead (attributable to this cancer dx)	4	Dead	One primary only	56	5383946
Black	Female	8170	T1	N0	0	No radiation and/or cancer-directed surgery	Not recommended	No/Unknown	22	10	No	No	No	No	Alive or dead of other cause	61	Alive	One primary only	65	5383948
Black	Male	8170	T2	N0	0	No radiation and/or cancer-directed surgery	Not recommended	No/Unknown	30	10	No	No	No	No	Dead (attributable to this cancer dx)	40	Dead	One primary only	51	5384166
White	Male	8172	T2	N0	16	No radiation and/or cancer-directed surgery	Surgery performed	Yes	30	10	No	No	No	No	Dead (attributable to this cancer dx)	43	Dead	One primary only	61	5384254
White	Male	8170	T2	N0	0	No radiation and/or cancer-directed surgery	Not recommended	Yes	43	10	No	No	No	No	Alive or dead of other cause	32	Dead	One primary only	63	5384259
White	Male	8170	T3b	N0	0	No radiation and/or cancer-directed surgery	Not recommended	No/Unknown	74	998	No	No	No	No	Alive or dead of other cause	1	Alive	One primary only	56	5384262
White	Male	8170	T1	N0	36	No radiation and/or cancer-directed surgery	Surgery performed	Yes	80	20	No	No	No	No	Alive or dead of other cause	64	Alive	One primary only	58	5384263
White	Male	8170	T1	N0	0	No radiation and/or cancer-directed surgery	Not recommended	No/Unknown	999	998	No	No	No	No	Dead (attributable to this cancer dx)	0	Dead	One primary only	63	5384435
White	Female	8170	T1	N0	0	No radiation and/or cancer-directed surgery	Not recommended	No/Unknown	53	10	No	No	No	No	Dead (attributable to this cancer dx)	28	Dead	One primary only	79	5384451
Other (American Indian/AK Native, Asian/Pacific Islander)	Female	8170	T3b	N0	0	No radiation and/or cancer-directed surgery	Not recommended	Yes	999	20	No	No	No	No	Dead (attributable to this cancer dx)	27	Dead	One primary only	60	5384496
White	Male	8170	T1	N0	0	No radiation and/or cancer-directed surgery	Not recommended	Yes	35	10	No	No	No	No	Dead (attributable to this cancer dx)	4	Dead	One primary only	53	5384719
Other (American Indian/AK Native, Asian/Pacific Islander)	Male	8170	T3b	N0	0	No radiation and/or cancer-directed surgery	Not recommended, contraindicated due to other cond; autopsy only (1973-2002)	Yes	999	20	No	No	No	No	Dead (attributable to this cancer dx)	4	Dead	One primary only	50	5384744
Other (American Indian/AK Native, Asian/Pacific Islander)	Male	8170	T1	N0	0	No radiation and/or cancer-directed surgery	Not recommended	Yes	70	10	No	No	No	No	Dead (attributable to this cancer dx)	19	Dead	One primary only	75	5384758
Black	Male	8170	T3a	N0	0	No radiation and/or cancer-directed surgery	Not recommended	Yes	203	10	No	No	No	No	Dead (attributable to this cancer dx)	4	Dead	One primary only	72	5384769
Black	Male	8170	T1	N0	0	No radiation and/or cancer-directed surgery	Recommended but not performed, unknown reason	No/Unknown	24	10	No	No	No	No	Alive or dead of other cause	67	Alive	One primary only	54	5384900
White	Male	8170	T2	N0	0	No radiation and/or cancer-directed surgery	Recommended but not performed, unknown reason	No/Unknown	28	10	No	No	No	No	Alive or dead of other cause	8	Dead	One primary only	58	5384903
White	Male	8170	T2	N0	16	No radiation and/or cancer-directed surgery	Surgery performed	Yes	35	10	No	No	No	No	Dead (attributable to this cancer dx)	20	Dead	One primary only	67	5384924
White	Male	8170	T3a	N0	0	No radiation and/or cancer-directed surgery	Recommended but not performed, unknown reason	No/Unknown	56	10	No	No	No	No	Dead (attributable to this cancer dx)	1	Dead	One primary only	60	5384945
White	Male	8170	T1	N0	23	No radiation and/or cancer-directed surgery	Surgery performed	No/Unknown	34	10	No	No	No	No	Alive or dead of other cause	6	Dead	One primary only	61	5384955
White	Female	8170	T2	N0	0	No radiation and/or cancer-directed surgery	Not recommended	Yes	32	10	No	No	No	No	Alive or dead of other cause	61	Alive	One primary only	63	5384965
Other (American Indian/AK Native, Asian/Pacific Islander)	Male	8170	T1	N0	0	No radiation and/or cancer-directed surgery	Not recommended	Yes	42	10	No	No	No	No	Dead (attributable to this cancer dx)	43	Dead	1st of 2 or more primaries	63	5385409
White	Male	8170	T3a	N1	0	No radiation and/or cancer-directed surgery	Not recommended	Yes	127	10	Yes	No	No	No	Dead (attributable to this cancer dx)	17	Dead	One primary only	55	5385573
White	Male	8170	T1	N0	0	No radiation and/or cancer-directed surgery	Not recommended	Yes	190	10	No	No	No	No	Dead (attributable to this cancer dx)	2	Dead	One primary only	81	5385913
White	Male	8170	T1	N0	0	No radiation and/or cancer-directed surgery	Not recommended	Yes	21	20	No	No	No	No	Alive or dead of other cause	16	Dead	One primary only	62	5386143
Black	Male	8170	T1	N0	16	No radiation and/or cancer-directed surgery	Surgery performed	No/Unknown	10	10	No	No	No	No	Dead (attributable to this cancer dx)	49	Dead	One primary only	74	5386188
White	Male	8170	T1	N0	61	No radiation and/or cancer-directed surgery	Surgery performed	No/Unknown	30	20	No	No	No	No	Alive or dead of other cause	60	Alive	One primary only	62	5386421
Other (American Indian/AK Native, Asian/Pacific Islander)	Male	8170	T1	N0	16	No radiation and/or cancer-directed surgery	Surgery performed	No/Unknown	36	20	No	No	No	No	Alive or dead of other cause	60	Alive	One primary only	78	5386456
White	Male	8170	T2	N0	0	No radiation and/or cancer-directed surgery	Not recommended	No/Unknown	40	10	No	No	No	No	Alive or dead of other cause	15	Dead	One primary only	69	5386474
Other (American Indian/AK Native, Asian/Pacific Islander)	Male	8170	T1	N0	0	No radiation and/or cancer-directed surgery	Not recommended	Yes	17	20	No	No	No	No	Dead (attributable to this cancer dx)	7	Dead	One primary only	60	5386477
Other (American Indian/AK Native, Asian/Pacific Islander)	Male	8170	T1	N0	60	No radiation and/or cancer-directed surgery	Surgery performed	Yes	67	10	No	No	No	No	Alive or dead of other cause	58	Alive	One primary only	46	5386564
White	Female	8170	T3a	N0	0	No radiation and/or cancer-directed surgery	Not recommended	Yes	52	10	No	No	No	No	Dead (attributable to this cancer dx)	21	Dead	One primary only	87	5386699
Other (American Indian/AK Native, Asian/Pacific Islander)	Male	8170	T1	N0	37	No radiation and/or cancer-directed surgery	Surgery performed	Yes	105	10	No	No	No	No	Alive or dead of other cause	59	Alive	One primary only	70	5386722
White	Female	8170	T2	N0	0	No radiation and/or cancer-directed surgery	Not recommended	Yes	22	10	No	No	No	No	Alive or dead of other cause	58	Alive	One primary only	65	5386810
Other (American Indian/AK Native, Asian/Pacific Islander)	Male	8170	T2	N0	0	No radiation and/or cancer-directed surgery	Not recommended	Yes	30	10	No	No	No	No	Alive or dead of other cause	53	Dead	1st of 2 or more primaries	63	5386819
Other (American Indian/AK Native, Asian/Pacific Islander)	Female	8170	T1	N1	0	No radiation and/or cancer-directed surgery	Not recommended	No/Unknown	159	998	No	No	No	No	Dead (attributable to this cancer dx)	7	Dead	One primary only	80	5387023
White	Male	8170	T1	N0	23	No radiation and/or cancer-directed surgery	Surgery performed	No/Unknown	62	10	No	No	No	No	Alive or dead of other cause	59	Alive	One primary only	63	5387136
Black	Male	8170	T1	N0	0	No radiation and/or cancer-directed surgery	Not recommended	Yes	999	10	No	No	No	No	Dead (attributable to this cancer dx)	30	Dead	One primary only	62	5387147
White	Male	8170	T1	N0	0	No radiation and/or cancer-directed surgery	Not recommended	No/Unknown	995	10	No	No	No	No	Dead (attributable to this cancer dx)	1	Dead	One primary only	56	5387185
White	Male	8170	T3b	N0	16	No radiation and/or cancer-directed surgery	Surgery performed	No/Unknown	75	10	No	No	No	No	Dead (attributable to this cancer dx)	17	Dead	One primary only	55	5387457
Other (American Indian/AK Native, Asian/Pacific Islander)	Male	8170	T3a	N1	0	No radiation and/or cancer-directed surgery	Not recommended	Yes	110	20	No	No	No	No	Dead (attributable to this cancer dx)	13	Dead	One primary only	58	5387499
White	Male	8170	T2	N0	61	No radiation and/or cancer-directed surgery	Surgery performed	No/Unknown	23	20	No	No	No	No	Alive or dead of other cause	62	Alive	One primary only	52	5387540
White	Male	8170	T2	N0	0	No radiation and/or cancer-directed surgery	Recommended, unknown if performed	Yes	22	10	No	No	No	No	Alive or dead of other cause	63	Alive	One primary only	67	5387604
White	Female	8170	T3b	N0	0	No radiation and/or cancer-directed surgery	Not recommended	Yes	183	10	No	No	No	Yes	Dead (attributable to this cancer dx)	3	Dead	One primary only	59	5387605
White	Male	8170	T1	N0	0	No radiation and/or cancer-directed surgery	Recommended, unknown if performed	Yes	40	10	No	No	No	No	Alive or dead of other cause	26	Dead	One primary only	56	5387610
White	Male	8170	T1	N0	0	No radiation and/or cancer-directed surgery	Not recommended	Yes	39	10	No	No	No	No	Alive or dead of other cause	63	Alive	One primary only	54	5387611
Black	Female	8170	T2	N0	0	No radiation and/or cancer-directed surgery	Not recommended	Yes	50	10	Yes	No	No	No	Dead (attributable to this cancer dx)	2	Dead	One primary only	50	5388198
White	Female	8170	T1	N0	0	No radiation and/or cancer-directed surgery	Not recommended	No/Unknown	210	20	No	No	No	No	Dead (attributable to this cancer dx)	7	Dead	One primary only	89	5388201
Other (American Indian/AK Native, Asian/Pacific Islander)	Male	8170	T1	N0	0	No radiation and/or cancer-directed surgery	Not recommended	Yes	18	20	No	No	No	No	Alive or dead of other cause	59	Alive	One primary only	64	5388487
White	Male	8170	T2	N0	0	No radiation and/or cancer-directed surgery	Not recommended	No/Unknown	999	10	No	No	No	Yes	Dead (attributable to this cancer dx)	0	Dead	One primary only	50	5388509
White	Male	8170	T3a	N1	0	No radiation and/or cancer-directed surgery	Not recommended	Yes	108	20	Yes	No	Yes	Yes	Dead (attributable to this cancer dx)	1	Dead	One primary only	57	5388535
Black	Male	8170	T3b	N0	0	No radiation and/or cancer-directed surgery	Not recommended	No/Unknown	210	999	No	No	No	Yes	Dead (attributable to this cancer dx)	6	Dead	One primary only	57	5388689
Black	Male	8170	T1	N0	0	No radiation and/or cancer-directed surgery	Not recommended	Yes	22	20	No	No	No	No	Alive or dead of other cause	62	Alive	1st of 2 or more primaries	66	5388736
White	Male	8170	T1	N0	61	No radiation and/or cancer-directed surgery	Surgery performed	No/Unknown	25	20	No	No	No	No	Dead (attributable to this cancer dx)	42	Dead	One primary only	66	5388810
White	Male	8170	T3a	N1	0	No radiation and/or cancer-directed surgery	Not recommended	Yes	110	10	No	No	No	No	Dead (attributable to this cancer dx)	6	Dead	One primary only	66	5389453
White	Female	8170	T2	N0	0	No radiation and/or cancer-directed surgery	Not recommended	Yes	23	10	No	No	No	No	Dead (attributable to this cancer dx)	5	Dead	One primary only	56	5389558
Black	Male	8170	T1	N0	16	No radiation and/or cancer-directed surgery	Surgery performed	No/Unknown	14	10	No	No	No	No	Alive or dead of other cause	56	Alive	One primary only	44	5389727
Black	Male	8170	T1	N0	61	No radiation and/or cancer-directed surgery	Surgery performed	No/Unknown	31	20	No	No	No	Yes	Alive or dead of other cause	59	Alive	One primary only	56	5389730
White	Female	8174	T3a	N0	36	No radiation and/or cancer-directed surgery	Surgery performed	Yes	90	20	No	No	No	No	Dead (attributable to this cancer dx)	41	Dead	One primary only	37	5389828
White	Female	8170	T3a	N0	36	No radiation and/or cancer-directed surgery	Surgery performed	No/Unknown	70	10	No	No	No	No	Dead (attributable to this cancer dx)	20	Dead	One primary only	55	5389881
White	Male	8170	T2	N0	0	No radiation and/or cancer-directed surgery	Not recommended	Yes	27	20	No	No	No	No	Dead (attributable to this cancer dx)	30	Dead	One primary only	67	5390067
Other (American Indian/AK Native, Asian/Pacific Islander)	Male	8170	T1	N0	60	Radiation after surgery	Surgery performed	No/Unknown	28	10	No	No	No	No	Dead (attributable to this cancer dx)	32	Dead	One primary only	62	5390114
Black	Male	8170	T3b	N1	0	No radiation and/or cancer-directed surgery	Not recommended	Yes	190	10	No	No	No	No	Dead (attributable to this cancer dx)	5	Dead	One primary only	51	5390380
White	Male	8170	T3b	N0	0	No radiation and/or cancer-directed surgery	Not recommended	Yes	999	999	No	No	No	No	Dead (attributable to this cancer dx)	5	Dead	One primary only	58	5390576
Other (American Indian/AK Native, Asian/Pacific Islander)	Male	8170	T1	N0	23	No radiation and/or cancer-directed surgery	Surgery performed	No/Unknown	40	20	No	No	No	No	Alive or dead of other cause	58	Alive	One primary only	61	5390702
White	Male	8170	T1	NX	0	No radiation and/or cancer-directed surgery	Not recommended	No/Unknown	90	10	No	No	No	No	Alive or dead of other cause	59	Alive	One primary only	73	5390747
White	Male	8170	T1	N0	52	No radiation and/or cancer-directed surgery	Surgery performed	No/Unknown	60	20	No	No	No	No	Alive or dead of other cause	17	Dead	One primary only	67	5390968
Other (American Indian/AK Native, Asian/Pacific Islander)	Male	8170	T3a	N0	0	No radiation and/or cancer-directed surgery	Not recommended	No/Unknown	58	998	No	No	No	No	Dead (attributable to this cancer dx)	1	Dead	One primary only	52	5391108
White	Female	8170	T1	N0	0	No radiation and/or cancer-directed surgery	Not recommended	Yes	64	20	No	No	No	No	Dead (attributable to this cancer dx)	10	Dead	One primary only	69	5391310
White	Male	8170	T1	N1	16	No radiation and/or cancer-directed surgery	Surgery performed	No/Unknown	19	20	No	No	No	No	Alive or dead of other cause	57	Alive	One primary only	60	5391315
White	Male	8170	TX	NX	0	No radiation and/or cancer-directed surgery	Not recommended	No/Unknown	999	999	No	No	No	No	Dead (attributable to this cancer dx)	11	Dead	One primary only	52	5391542
Other (American Indian/AK Native, Asian/Pacific Islander)	Male	8170	T2	N0	51	No radiation and/or cancer-directed surgery	Surgery performed	No/Unknown	23	10	No	No	No	No	Alive or dead of other cause	61	Alive	One primary only	70	5391745
Black	Male	8170	T3a	N0	0	No radiation and/or cancer-directed surgery	Not recommended	Yes	81	10	No	No	No	No	Dead (attributable to this cancer dx)	19	Dead	One primary only	54	5391925
Other (American Indian/AK Native, Asian/Pacific Islander)	Female	8170	T1	N0	37	No radiation and/or cancer-directed surgery	Surgery performed	Yes	46	20	No	No	No	No	Alive or dead of other cause	61	Alive	One primary only	50	5391926
White	Male	8170	T1	N0	61	No radiation and/or cancer-directed surgery	Surgery performed	Yes	30	10	No	No	No	No	Alive or dead of other cause	38	Dead	One primary only	59	5391927
Other (American Indian/AK Native, Asian/Pacific Islander)	Male	8170	T4	N0	0	No radiation and/or cancer-directed surgery	Not recommended	No/Unknown	47	20	No	No	No	No	Dead (attributable to this cancer dx)	1	Dead	One primary only	79	5391930
Other (American Indian/AK Native, Asian/Pacific Islander)	Female	8170	T1	N0	16	No radiation and/or cancer-directed surgery	Surgery performed	No/Unknown	16	10	No	No	No	No	Alive or dead of other cause	55	Alive	One primary only	67	5391948
White	Male	8170	T1	N0	37	No radiation and/or cancer-directed surgery	Surgery performed	No/Unknown	52	20	No	No	No	No	Alive or dead of other cause	17	Dead	1st of 2 or more primaries	83	5392096
Black	Male	8170	T1	N0	0	No radiation and/or cancer-directed surgery	Recommended but not performed, unknown reason	No/Unknown	999	10	No	No	No	No	Dead (attributable to this cancer dx)	19	Dead	One primary only	64	5392483
White	Male	8170	T2	N0	30	No radiation and/or cancer-directed surgery	Surgery performed	No/Unknown	46	999	No	No	No	No	Alive or dead of other cause	63	Alive	1st of 2 or more primaries	59	5392508
Other (American Indian/AK Native, Asian/Pacific Islander)	Male	8170	TX	N0	0	No radiation and/or cancer-directed surgery	Not recommended, contraindicated due to other cond; autopsy only (1973-2002)	No/Unknown	999	10	No	No	No	No	Dead (attributable to this cancer dx)	24	Dead	One primary only	64	5392517
White	Male	8170	T2	N0	0	No radiation and/or cancer-directed surgery	Recommended but not performed, unknown reason	No/Unknown	30	20	No	No	Yes	No	Alive or dead of other cause	0	Alive	One primary only	56	5392524
White	Male	8170	T1	N0	0	No radiation and/or cancer-directed surgery	Not recommended	No/Unknown	996	999	No	No	No	No	Dead (attributable to this cancer dx)	6	Dead	One primary only	80	5392551
White	Female	8170	T3a	N1	0	No radiation and/or cancer-directed surgery	Not recommended	Yes	57	10	No	No	No	No	Dead (attributable to this cancer dx)	6	Dead	One primary only	70	5392598
White	Female	8170	T1	N0	61	No radiation and/or cancer-directed surgery	Surgery performed	Yes	31	20	No	No	No	No	Alive or dead of other cause	60	Alive	One primary only	58	5392620
White	Male	8170	TX	NX	0	No radiation and/or cancer-directed surgery	Recommended but not performed, unknown reason	No/Unknown	999	10	Yes	No	No	No	Dead (attributable to this cancer dx)	3	Dead	One primary only	73	5392684
White	Male	8170	T1	N0	0	No radiation and/or cancer-directed surgery	Not recommended	Yes	20	998	No	No	No	No	Dead (attributable to this cancer dx)	40	Dead	One primary only	72	5392903
White	Male	8170	T3b	N1	0	No radiation and/or cancer-directed surgery	Not recommended	No/Unknown	122	10	No	No	No	No	Dead (attributable to this cancer dx)	2	Dead	One primary only	74	5393137
White	Female	8170	T3a	N1	0	No radiation and/or cancer-directed surgery	Not recommended	Yes	88	10	No	No	No	No	Dead (attributable to this cancer dx)	4	Dead	One primary only	86	5393225
White	Male	8170	T2	N0	0	No radiation and/or cancer-directed surgery	Not recommended	Yes	49	20	No	No	No	No	Dead (attributable to this cancer dx)	37	Dead	One primary only	73	5393310
White	Male	8170	T3a	N0	0	No radiation and/or cancer-directed surgery	Not recommended	No/Unknown	110	10	No	No	No	No	Dead (attributable to this cancer dx)	10	Dead	One primary only	83	5393351
Other (American Indian/AK Native, Asian/Pacific Islander)	Male	8170	T1	N0	16	No radiation and/or cancer-directed surgery	Surgery performed	No/Unknown	39	20	No	No	No	No	Alive or dead of other cause	61	Alive	One primary only	68	5393524
Other (American Indian/AK Native, Asian/Pacific Islander)	Female	8170	T1	N0	0	No radiation and/or cancer-directed surgery	Not recommended	No/Unknown	60	999	No	No	No	No	Dead (attributable to this cancer dx)	1	Dead	One primary only	81	5393569
Other (American Indian/AK Native, Asian/Pacific Islander)	Male	8170	TX	NX	0	No radiation and/or cancer-directed surgery	Not recommended	No/Unknown	999	10	No	No	No	No	Dead (attributable to this cancer dx)	0	Dead	One primary only	82	5393606
White	Male	8170	T3b	N0	0	No radiation and/or cancer-directed surgery	Not recommended	No/Unknown	85	10	No	No	No	No	Dead (attributable to this cancer dx)	15	Dead	One primary only	62	5393620
Other (American Indian/AK Native, Asian/Pacific Islander)	Male	8170	T1	N0	0	No radiation and/or cancer-directed surgery	Not recommended	No/Unknown	133	10	No	No	No	Yes	Dead (attributable to this cancer dx)	0	Dead	One primary only	76	5393698
Other (American Indian/AK Native, Asian/Pacific Islander)	Male	8170	T1	N0	0	No radiation and/or cancer-directed surgery	Not recommended	No/Unknown	55	10	No	No	No	No	Dead (attributable to this cancer dx)	37	Dead	One primary only	58	5393701
Other (American Indian/AK Native, Asian/Pacific Islander)	Male	8170	T2	N0	17	No radiation and/or cancer-directed surgery	Surgery performed	No/Unknown	10	10	No	No	No	No	Alive or dead of other cause	57	Alive	One primary only	53	5393838
Black	Female	8170	TX	N0	0	No radiation and/or cancer-directed surgery	Not recommended	No/Unknown	999	999	No	No	No	No	Dead (attributable to this cancer dx)	36	Dead	One primary only	54	5394175
White	Female	8170	T1	N0	0	No radiation and/or cancer-directed surgery	Not recommended	Yes	23	10	No	No	No	No	Dead (attributable to this cancer dx)	18	Dead	One primary only	69	5394256
Black	Male	8170	T3b	N0	0	No radiation and/or cancer-directed surgery	Not recommended	Yes	999	10	No	No	No	No	Dead (attributable to this cancer dx)	10	Dead	One primary only	60	5394264
Other (American Indian/AK Native, Asian/Pacific Islander)	Male	8170	T1	N0	16	No radiation and/or cancer-directed surgery	Surgery performed	Yes	27	10	No	No	No	No	Alive or dead of other cause	56	Dead	One primary only	67	5394268
White	Male	8170	T1	N0	0	No radiation and/or cancer-directed surgery	Not recommended	Yes	27	10	No	No	No	No	Alive or dead of other cause	63	Alive	One primary only	65	5394271
Other (American Indian/AK Native, Asian/Pacific Islander)	Female	8170	T1	N0	0	No radiation and/or cancer-directed surgery	Not recommended	Yes	33	20	No	No	No	No	Alive or dead of other cause	59	Alive	One primary only	65	5394274
Black	Male	8170	T1	N0	0	No radiation and/or cancer-directed surgery	Not recommended	Yes	59	999	No	No	No	No	Alive or dead of other cause	59	Alive	One primary only	64	5394402
Black	Female	8170	T1	N0	22	No radiation and/or cancer-directed surgery	Surgery performed	No/Unknown	5	998	No	No	No	No	Alive or dead of other cause	57	Alive	1st of 2 or more primaries	54	5394596
Black	Male	8170	T2	N0	0	No radiation and/or cancer-directed surgery	Not recommended	Yes	62	20	No	No	No	No	Alive or dead of other cause	12	Dead	One primary only	66	5394661
White	Male	8170	T1	N0	0	No radiation and/or cancer-directed surgery	Not recommended	No/Unknown	92	10	No	No	No	No	Dead (attributable to this cancer dx)	2	Dead	One primary only	53	5394664
Other (American Indian/AK Native, Asian/Pacific Islander)	Male	8170	T3a	NX	0	No radiation and/or cancer-directed surgery	Not recommended	Yes	65	10	No	No	No	No	Dead (attributable to this cancer dx)	8	Dead	One primary only	73	5394683
Other (American Indian/AK Native, Asian/Pacific Islander)	Female	8170	T2	N0	0	No radiation and/or cancer-directed surgery	Not recommended	Yes	13	10	No	No	No	No	Alive or dead of other cause	57	Alive	One primary only	53	5395102
White	Female	8170	T1	N0	15	No radiation and/or cancer-directed surgery	Surgery performed	Yes	30	10	No	No	No	No	Alive or dead of other cause	58	Alive	One primary only	64	5395126
Other (American Indian/AK Native, Asian/Pacific Islander)	Male	8170	T1	N0	61	No radiation and/or cancer-directed surgery	Surgery performed	Yes	25	20	No	No	No	No	Alive or dead of other cause	54	Alive	One primary only	63	5395230
Black	Female	8170	T3b	N0	0	No radiation and/or cancer-directed surgery	Not recommended	No/Unknown	47	10	No	No	No	No	Dead (attributable to this cancer dx)	1	Dead	One primary only	62	5395718
Other (American Indian/AK Native, Asian/Pacific Islander)	Male	8170	T1	N0	0	No radiation and/or cancer-directed surgery	Not recommended	No/Unknown	72	20	No	No	No	No	Alive or dead of other cause	35	Dead	One primary only	83	5395800
White	Male	8170	T1	N0	20	No radiation and/or cancer-directed surgery	Surgery performed	No/Unknown	999	20	No	No	No	No	Dead (attributable to this cancer dx)	19	Dead	One primary only	58	5395818
White	Male	8170	T2	N0	61	No radiation and/or cancer-directed surgery	Surgery performed	Yes	24	10	No	No	No	No	Alive or dead of other cause	57	Alive	One primary only	60	5395875
White	Male	8170	T2	N1	0	No radiation and/or cancer-directed surgery	Not recommended	Yes	43	10	No	No	No	No	Dead (attributable to this cancer dx)	28	Dead	One primary only	59	5395915
Black	Female	8170	T1	N0	0	No radiation and/or cancer-directed surgery	Not recommended	Yes	25	10	No	No	No	No	Alive or dead of other cause	59	Alive	One primary only	61	5395928
White	Male	8170	T1	N0	0	No radiation and/or cancer-directed surgery	Not recommended	Yes	22	10	No	No	No	No	Alive or dead of other cause	63	Alive	One primary only	44	5395949
White	Male	8170	T1	N0	37	No radiation and/or cancer-directed surgery	Surgery performed	No/Unknown	120	20	No	No	No	No	Alive or dead of other cause	60	Alive	One primary only	74	5395986
Other (American Indian/AK Native, Asian/Pacific Islander)	Male	8170	TX	N1	0	No radiation and/or cancer-directed surgery	Not recommended	No/Unknown	999	10	No	No	No	No	Dead (attributable to this cancer dx)	0	Dead	One primary only	57	5396069
White	Male	8170	T1	N0	0	No radiation and/or cancer-directed surgery	Not recommended	No/Unknown	22	10	No	No	No	No	Dead (attributable to this cancer dx)	8	Dead	1st of 2 or more primaries	59	5396135
White	Female	8170	T1	N0	0	No radiation and/or cancer-directed surgery	Not recommended	Yes	42	10	No	No	No	No	Alive or dead of other cause	60	Alive	1st of 2 or more primaries	60	5396142
White	Male	8170	T3b	N0	0	No radiation and/or cancer-directed surgery	Not recommended	No/Unknown	999	10	No	Yes	No	Yes	Dead (attributable to this cancer dx)	0	Dead	One primary only	59	5396225
White	Male	8170	T3a	N1	0	No radiation and/or cancer-directed surgery	Not recommended	No/Unknown	137	10	No	No	No	No	Dead (attributable to this cancer dx)	0	Dead	One primary only	63	5396433
Other (American Indian/AK Native, Asian/Pacific Islander)	Male	8170	T1	N0	0	No radiation and/or cancer-directed surgery	Not recommended	Yes	87	20	No	No	No	No	Alive or dead of other cause	56	Alive	One primary only	76	5396459
Other (American Indian/AK Native, Asian/Pacific Islander)	Female	8170	T2	N0	0	No radiation and/or cancer-directed surgery	Not recommended	Yes	23	20	No	No	No	No	Alive or dead of other cause	59	Alive	One primary only	75	5396475
White	Male	8170	T1	N0	0	No radiation and/or cancer-directed surgery	Not recommended	Yes	29	20	No	No	No	No	Dead (attributable to this cancer dx)	61	Dead	One primary only	87	5396522
Other (American Indian/AK Native, Asian/Pacific Islander)	Female	8170	T4	N0	0	No radiation and/or cancer-directed surgery	Not recommended	Yes	54	10	No	No	No	No	Dead (attributable to this cancer dx)	47	Dead	1st of 2 or more primaries	50	5396639
Black	Male	8170	T3a	N0	0	No radiation and/or cancer-directed surgery	Not recommended	No/Unknown	61	10	No	No	No	No	Dead (attributable to this cancer dx)	12	Dead	One primary only	54	5396878
Other (American Indian/AK Native, Asian/Pacific Islander)	Male	8170	T1	N0	50	No radiation and/or cancer-directed surgery	Surgery performed	No/Unknown	60	10	No	No	No	No	Alive or dead of other cause	56	Alive	One primary only	56	5396969
White	Female	8170	T1	NX	0	No radiation and/or cancer-directed surgery	Not recommended	No/Unknown	32	10	No	No	No	No	Dead (attributable to this cancer dx)	9	Dead	One primary only	65	5396987
Black	Male	8170	T1	N0	0	No radiation and/or cancer-directed surgery	Not recommended	Yes	43	10	No	No	No	No	Dead (attributable to this cancer dx)	34	Dead	One primary only	66	5397059
Other (American Indian/AK Native, Asian/Pacific Islander)	Female	8170	T4	N0	0	No radiation and/or cancer-directed surgery	Not recommended	No/Unknown	61	998	No	No	No	No	Dead (attributable to this cancer dx)	0	Dead	One primary only	77	5397324
Other (American Indian/AK Native, Asian/Pacific Islander)	Male	8170	T3b	N0	0	No radiation and/or cancer-directed surgery	Not recommended	No/Unknown	999	10	No	No	No	No	Alive or dead of other cause	6	Dead	One primary only	84	5397334
Other (American Indian/AK Native, Asian/Pacific Islander)	Male	8170	T1	NX	0	No radiation and/or cancer-directed surgery	Not recommended	No/Unknown	56	998	No	No	No	No	Dead (attributable to this cancer dx)	5	Dead	One primary only	82	5397348
White	Male	8170	T2	N0	0	No radiation and/or cancer-directed surgery	Not recommended	Yes	32	10	No	No	No	No	Dead (attributable to this cancer dx)	11	Dead	One primary only	61	5397423
White	Female	8170	T1	N0	23	No radiation and/or cancer-directed surgery	Surgery performed	Yes	23	10	No	No	No	No	Dead (attributable to this cancer dx)	15	Dead	One primary only	54	5397687
Other (American Indian/AK Native, Asian/Pacific Islander)	Male	8170	T1	N0	16	No radiation and/or cancer-directed surgery	Surgery performed	No/Unknown	33	10	No	No	No	No	Alive or dead of other cause	56	Alive	One primary only	56	5397749
White	Male	8170	T1	N0	0	No radiation and/or cancer-directed surgery	Not recommended	No/Unknown	145	20	No	No	No	No	Dead (attributable to this cancer dx)	0	Dead	One primary only	64	5397752
Other (American Indian/AK Native, Asian/Pacific Islander)	Male	8170	T2	N0	36	No radiation and/or cancer-directed surgery	Surgery performed	No/Unknown	13	10	No	No	No	No	Alive or dead of other cause	55	Alive	One primary only	31	5397981
White	Male	8170	T1	N0	0	No radiation and/or cancer-directed surgery	Not recommended	No/Unknown	60	20	No	No	No	No	Dead (attributable to this cancer dx)	1	Dead	One primary only	79	5398060
White	Male	8170	T1	N0	16	No radiation and/or cancer-directed surgery	Surgery performed	Yes	25	10	No	No	No	No	Dead (attributable to this cancer dx)	25	Dead	One primary only	58	5398107
Black	Male	8170	T1	N0	0	No radiation and/or cancer-directed surgery	Not recommended	No/Unknown	29	999	No	No	No	No	Dead (attributable to this cancer dx)	20	Dead	One primary only	68	5398180
White	Male	8170	T1	N0	0	No radiation and/or cancer-directed surgery	Not recommended	Yes	220	999	Yes	No	No	No	Dead (attributable to this cancer dx)	31	Dead	One primary only	50	5398209
White	Female	8170	T2	N0	0	No radiation and/or cancer-directed surgery	Not recommended	Yes	21	999	No	No	No	No	Alive or dead of other cause	8	Dead	One primary only	61	5398212
Other (American Indian/AK Native, Asian/Pacific Islander)	Male	8170	T1	N0	30	No radiation and/or cancer-directed surgery	Surgery performed	No/Unknown	20	20	No	No	No	No	Alive or dead of other cause	56	Alive	1st of 2 or more primaries	64	5398367
White	Female	8170	TX	N0	0	No radiation and/or cancer-directed surgery	Not recommended	No/Unknown	999	10	No	No	No	No	Alive or dead of other cause	3	Dead	One primary only	80	5398555
White	Male	8170	T1	N0	16	No radiation and/or cancer-directed surgery	Surgery performed	Yes	36	10	No	No	No	No	Alive or dead of other cause	18	Dead	One primary only	79	5398564
White	Male	8170	T1	N0	0	No radiation and/or cancer-directed surgery	Not recommended	Yes	10	10	No	No	No	No	Alive or dead of other cause	10	Dead	One primary only	60	5398749
Other (American Indian/AK Native, Asian/Pacific Islander)	Male	8170	T1	N0	61	No radiation and/or cancer-directed surgery	Surgery performed	Yes	23	20	No	No	No	No	Alive or dead of other cause	57	Alive	One primary only	58	5398808
White	Male	8170	T1	N0	0	No radiation and/or cancer-directed surgery	Not recommended	No/Unknown	45	998	No	No	No	No	Dead (attributable to this cancer dx)	9	Dead	One primary only	63	5398915
Other (American Indian/AK Native, Asian/Pacific Islander)	Male	8170	T1	NX	0	No radiation and/or cancer-directed surgery	Not recommended	No/Unknown	100	10	Yes	No	No	No	Dead (attributable to this cancer dx)	5	Dead	One primary only	62	5398924
White	Male	8170	T1	N0	0	No radiation and/or cancer-directed surgery	Not recommended	Yes	999	998	No	No	No	No	Dead (attributable to this cancer dx)	32	Dead	One primary only	68	5399032
White	Male	8170	T1	N0	0	No radiation and/or cancer-directed surgery	Not recommended, contraindicated due to other cond; autopsy only (1973-2002)	Yes	34	20	No	No	No	No	Alive or dead of other cause	58	Alive	One primary only	57	5399142
White	Female	8170	T3b	N0	0	No radiation and/or cancer-directed surgery	Not recommended	No/Unknown	989	10	No	No	No	No	Dead (attributable to this cancer dx)	0	Dead	One primary only	56	5399327
Other (American Indian/AK Native, Asian/Pacific Islander)	Male	8170	T3a	NX	61	No radiation and/or cancer-directed surgery	Surgery performed	No/Unknown	86	999	No	No	No	No	Dead (attributable to this cancer dx)	7	Dead	One primary only	48	5399328
White	Male	8170	T3b	N1	0	No radiation and/or cancer-directed surgery	Not recommended	No/Unknown	80	10	No	No	No	No	Dead (attributable to this cancer dx)	0	Dead	One primary only	62	5399329
White	Male	8170	T3a	N0	0	No radiation and/or cancer-directed surgery	Not recommended	Yes	127	20	No	No	No	No	Alive or dead of other cause	58	Alive	One primary only	80	5399331
Other (American Indian/AK Native, Asian/Pacific Islander)	Male	8170	T3b	N0	0	No radiation and/or cancer-directed surgery	Not recommended, contraindicated due to other cond; autopsy only (1973-2002)	Yes	40	10	No	No	No	No	Dead (attributable to this cancer dx)	3	Dead	One primary only	72	5399437
Other (American Indian/AK Native, Asian/Pacific Islander)	Male	8170	T1	N0	24	No radiation and/or cancer-directed surgery	Surgery performed	No/Unknown	32	10	No	No	No	No	Alive or dead of other cause	57	Alive	One primary only	72	5399548
White	Male	8170	T1	N0	0	No radiation and/or cancer-directed surgery	Not recommended	Yes	29	10	No	No	No	No	Alive or dead of other cause	22	Dead	One primary only	61	5399589
White	Female	8170	T1	N0	0	No radiation and/or cancer-directed surgery	Not recommended	No/Unknown	52	10	No	No	No	No	Dead (attributable to this cancer dx)	0	Dead	One primary only	76	5399661
White	Male	8170	T1	N0	0	No radiation and/or cancer-directed surgery	Not recommended	No/Unknown	50	10	No	No	No	No	Dead (attributable to this cancer dx)	11	Dead	One primary only	66	5399781
Black	Female	8170	T3a	N0	50	No radiation and/or cancer-directed surgery	Surgery performed	Yes	130	10	No	No	No	No	Dead (attributable to this cancer dx)	42	Dead	One primary only	69	5400102
White	Male	8170	T1	N0	0	No radiation and/or cancer-directed surgery	Not recommended	No/Unknown	989	10	No	No	No	No	Dead (attributable to this cancer dx)	0	Dead	One primary only	59	5400105
White	Male	8170	T1	N0	0	No radiation and/or cancer-directed surgery	Not recommended	No/Unknown	60	10	No	No	No	No	Alive or dead of other cause	3	Dead	One primary only	53	5400109
White	Male	8170	T2	N0	0	No radiation and/or cancer-directed surgery	Not recommended	Yes	34	10	No	No	No	No	Alive or dead of other cause	28	Dead	One primary only	71	5400243
White	Female	8170	T2	N0	0	No radiation and/or cancer-directed surgery	Not recommended	No/Unknown	41	10	No	No	No	No	Alive or dead of other cause	3	Dead	One primary only	59	5400244
Black	Male	8170	T3a	N0	0	No radiation and/or cancer-directed surgery	Not recommended	Yes	989	10	No	No	No	No	Dead (attributable to this cancer dx)	16	Dead	One primary only	61	5400406
White	Female	8170	T1	NX	0	No radiation and/or cancer-directed surgery	Not recommended	No/Unknown	200	10	No	No	No	No	Dead (attributable to this cancer dx)	3	Dead	One primary only	72	5400945
White	Male	8170	T1	N0	16	No radiation and/or cancer-directed surgery	Surgery performed	No/Unknown	26	10	No	No	No	No	Dead (attributable to this cancer dx)	21	Dead	One primary only	58	5401004
White	Male	8170	T1	N0	16	No radiation and/or cancer-directed surgery	Surgery performed	Yes	25	10	No	No	No	No	Alive or dead of other cause	64	Alive	One primary only	63	5401367
Other (American Indian/AK Native, Asian/Pacific Islander)	Male	8170	T3a	N1	0	No radiation and/or cancer-directed surgery	Not recommended	No/Unknown	100	10	No	No	No	Yes	Alive or dead of other cause	26	Alive	One primary only	53	5401423
White	Male	8170	T1	N0	0	No radiation and/or cancer-directed surgery	Not recommended	Yes	44	10	No	No	No	No	Dead (attributable to this cancer dx)	9	Dead	One primary only	54	5401681
White	Male	8170	T1	N0	0	No radiation and/or cancer-directed surgery	Not recommended	Yes	40	20	Yes	No	No	No	Dead (attributable to this cancer dx)	27	Dead	One primary only	62	5402134
Other (American Indian/AK Native, Asian/Pacific Islander)	Male	8170	T2	NX	0	No radiation and/or cancer-directed surgery	Not recommended	Yes	24	20	No	No	No	No	Dead (attributable to this cancer dx)	9	Dead	One primary only	40	5402140
White	Male	8170	T1	N0	0	No radiation and/or cancer-directed surgery	Not recommended	Yes	27	999	No	No	No	No	Alive or dead of other cause	20	Dead	One primary only	59	5402142
White	Female	8170	T3b	N0	0	No radiation and/or cancer-directed surgery	Not recommended	No/Unknown	58	20	No	No	No	No	Alive or dead of other cause	57	Alive	One primary only	58	5402398
White	Female	8170	T3b	N0	0	No radiation and/or cancer-directed surgery	Not recommended	No/Unknown	56	999	No	No	No	No	Dead (attributable to this cancer dx)	7	Dead	One primary only	77	5402399
Black	Male	8170	T3b	N1	0	No radiation and/or cancer-directed surgery	Not recommended	No/Unknown	150	10	No	No	No	No	Dead (attributable to this cancer dx)	0	Dead	One primary only	74	5402913
Other (American Indian/AK Native, Asian/Pacific Islander)	Male	8170	T1	N0	61	No radiation and/or cancer-directed surgery	Surgery performed	Yes	25	10	No	No	No	No	Alive or dead of other cause	51	Alive	One primary only	57	5403166
Other (American Indian/AK Native, Asian/Pacific Islander)	Female	8170	T1	N1	0	No radiation and/or cancer-directed surgery	Not recommended	No/Unknown	35	10	No	No	No	Yes	Dead (attributable to this cancer dx)	2	Dead	One primary only	71	5403174
White	Female	8170	T2	N0	0	No radiation and/or cancer-directed surgery	Recommended but not performed, patient refused	No/Unknown	29	10	No	No	No	No	Alive or dead of other cause	17	Dead	One primary only	64	5403335
Other (American Indian/AK Native, Asian/Pacific Islander)	Male	8170	T3b	N0	0	No radiation and/or cancer-directed surgery	Not recommended	Yes	54	20	No	No	No	No	Alive or dead of other cause	8	Dead	One primary only	58	5403337
Other (American Indian/AK Native, Asian/Pacific Islander)	Male	8170	T4	N0	0	No radiation and/or cancer-directed surgery	Not recommended	No/Unknown	154	10	No	No	No	No	Dead (attributable to this cancer dx)	3	Dead	One primary only	35	5403339
Other (American Indian/AK Native, Asian/Pacific Islander)	Male	8170	T1	N0	16	No radiation and/or cancer-directed surgery	Surgery performed	Yes	49	20	No	No	No	No	Alive or dead of other cause	55	Alive	One primary only	61	5403342
Other (American Indian/AK Native, Asian/Pacific Islander)	Male	8170	T2	N0	61	No radiation and/or cancer-directed surgery	Surgery performed	Yes	26	20	No	No	No	No	Alive or dead of other cause	54	Alive	One primary only	60	5403346
Other (American Indian/AK Native, Asian/Pacific Islander)	Male	8170	T1	N0	0	No radiation and/or cancer-directed surgery	Not recommended	No/Unknown	999	10	Yes	Yes	Yes	No	Alive or dead of other cause	1	Dead	One primary only	62	5403601
Other (American Indian/AK Native, Asian/Pacific Islander)	Male	8170	T4	N1	0	No radiation and/or cancer-directed surgery	Not recommended	Yes	80	10	No	No	No	No	Dead (attributable to this cancer dx)	4	Dead	One primary only	63	5403612
Black	Female	8170	T1	N0	0	No radiation and/or cancer-directed surgery	Not recommended	No/Unknown	999	999	No	No	No	No	Dead (attributable to this cancer dx)	2	Dead	One primary only	61	5403801
Other (American Indian/AK Native, Asian/Pacific Islander)	Male	8170	T1	N0	16	No radiation and/or cancer-directed surgery	Surgery performed	No/Unknown	25	20	No	No	No	No	Alive or dead of other cause	54	Alive	One primary only	60	5404523
Black	Male	8170	T1	N0	0	No radiation and/or cancer-directed surgery	Not recommended	Yes	67	10	No	No	No	No	Dead (attributable to this cancer dx)	45	Dead	One primary only	67	5404528
White	Male	8170	T1	N0	0	No radiation and/or cancer-directed surgery	Not recommended	Yes	92	10	No	No	No	No	Dead (attributable to this cancer dx)	6	Dead	One primary only	51	5404610
Black	Male	8170	T1	N0	17	No radiation and/or cancer-directed surgery	Surgery performed	No/Unknown	30	10	No	No	No	No	Dead (attributable to this cancer dx)	33	Dead	1st of 2 or more primaries	68	5404637
Other (American Indian/AK Native, Asian/Pacific Islander)	Female	8170	T1	N0	26	No radiation and/or cancer-directed surgery	Surgery performed	No/Unknown	49	20	No	No	No	No	Alive or dead of other cause	56	Alive	One primary only	54	5404991
White	Male	8170	T3b	N1	0	No radiation and/or cancer-directed surgery	Not recommended, contraindicated due to other cond; autopsy only (1973-2002)	No/Unknown	134	10	No	No	No	No	Alive or dead of other cause	0	Dead	One primary only	65	5404996
White	Female	8170	T1	N0	0	No radiation and/or cancer-directed surgery	Not recommended	No/Unknown	60	999	No	No	No	No	Dead (attributable to this cancer dx)	2	Dead	One primary only	70	5405083
Other (American Indian/AK Native, Asian/Pacific Islander)	Female	8170	T2	N0	0	No radiation and/or cancer-directed surgery	Not recommended	Yes	25	10	No	No	No	No	Alive or dead of other cause	25	Dead	One primary only	81	5405176
White	Male	8170	T3b	N0	0	No radiation and/or cancer-directed surgery	Not recommended	No/Unknown	150	10	No	No	Yes	No	Dead (attributable to this cancer dx)	1	Dead	One primary only	47	5405177
Other (American Indian/AK Native, Asian/Pacific Islander)	Male	8170	T4	N0	0	No radiation and/or cancer-directed surgery	Not recommended	No/Unknown	110	10	No	No	No	No	Dead (attributable to this cancer dx)	0	Dead	One primary only	60	5405182
Other (American Indian/AK Native, Asian/Pacific Islander)	Male	8170	T1	N0	36	No radiation and/or cancer-directed surgery	Surgery performed	Yes	109	20	No	No	No	No	Alive or dead of other cause	53	Alive	One primary only	73	5405498
Other (American Indian/AK Native, Asian/Pacific Islander)	Male	8170	T3a	N0	0	No radiation and/or cancer-directed surgery	Not recommended	Yes	999	10	No	No	No	No	Dead (attributable to this cancer dx)	32	Dead	One primary only	77	5405836
Other (American Indian/AK Native, Asian/Pacific Islander)	Male	8170	T4	N0	0	No radiation and/or cancer-directed surgery	Not recommended	No/Unknown	100	10	No	No	No	No	Dead (attributable to this cancer dx)	14	Dead	One primary only	81	5406133
Black	Male	8170	T1	N0	0	No radiation and/or cancer-directed surgery	Not recommended	Yes	20	20	No	No	No	No	Alive or dead of other cause	58	Alive	One primary only	65	5406292
Other (American Indian/AK Native, Asian/Pacific Islander)	Male	8170	TX	NX	0	No radiation and/or cancer-directed surgery	Not recommended	Yes	999	20	No	No	No	No	Dead (attributable to this cancer dx)	10	Dead	One primary only	52	5406319
White	Male	8170	T3b	N0	0	No radiation and/or cancer-directed surgery	Not recommended	No/Unknown	165	10	No	No	No	No	Dead (attributable to this cancer dx)	0	Dead	One primary only	66	5406344
White	Male	8170	T1	N0	0	No radiation and/or cancer-directed surgery	Not recommended	Yes	46	10	No	No	No	No	Dead (attributable to this cancer dx)	36	Dead	One primary only	50	5406867
White	Male	8170	T1	N0	0	No radiation and/or cancer-directed surgery	Not recommended	No/Unknown	52	10	No	No	No	No	Dead (attributable to this cancer dx)	9	Dead	One primary only	68	5406956
White	Male	8170	T2	N0	16	No radiation and/or cancer-directed surgery	Surgery performed	No/Unknown	46	20	No	No	No	No	Dead (attributable to this cancer dx)	50	Dead	One primary only	82	5407019
White	Male	8170	T1	N0	30	No radiation and/or cancer-directed surgery	Surgery performed	No/Unknown	55	10	No	No	No	No	Dead (attributable to this cancer dx)	4	Dead	One primary only	50	5407026
Other (American Indian/AK Native, Asian/Pacific Islander)	Male	8170	T1	N0	61	No radiation and/or cancer-directed surgery	Surgery performed	Yes	25	20	No	No	No	No	Alive or dead of other cause	54	Alive	One primary only	60	5407067
White	Male	8170	T1	N0	0	No radiation and/or cancer-directed surgery	Not recommended	Yes	43	10	No	No	No	No	Dead (attributable to this cancer dx)	44	Dead	1st of 2 or more primaries	68	5407477
White	Female	8170	T1	N0	0	No radiation and/or cancer-directed surgery	Not recommended	No/Unknown	35	20	No	No	No	No	Dead (attributable to this cancer dx)	1	Dead	One primary only	75	5408132
White	Male	8170	T1	N0	24	No radiation and/or cancer-directed surgery	Surgery performed	No/Unknown	30	10	No	No	No	No	Alive or dead of other cause	20	Dead	One primary only	57	5408140
White	Male	8170	T1	N0	0	No radiation and/or cancer-directed surgery	Not recommended	Yes	999	10	No	No	No	No	Dead (attributable to this cancer dx)	41	Dead	One primary only	71	5408452
Black	Female	8170	TX	NX	0	No radiation and/or cancer-directed surgery	Not recommended	No/Unknown	999	998	No	No	No	Yes	Dead (attributable to this cancer dx)	0	Dead	One primary only	88	5408644
Other (American Indian/AK Native, Asian/Pacific Islander)	Male	8170	T1	N0	16	No radiation and/or cancer-directed surgery	Surgery performed	No/Unknown	24	20	No	No	No	No	Dead (attributable to this cancer dx)	16	Dead	One primary only	57	5408804
Other (American Indian/AK Native, Asian/Pacific Islander)	Female	8170	T1	NX	0	No radiation and/or cancer-directed surgery	Not recommended	Yes	52	10	No	No	No	No	Dead (attributable to this cancer dx)	28	Dead	1st of 2 or more primaries	77	5408957
Black	Male	8170	T1	N0	0	No radiation and/or cancer-directed surgery	Not recommended	No/Unknown	999	10	No	No	No	No	Dead (attributable to this cancer dx)	6	Dead	One primary only	80	5408958
White	Male	8170	T1	N0	0	No radiation and/or cancer-directed surgery	Not recommended	Yes	100	20	No	No	No	No	Alive or dead of other cause	55	Alive	One primary only	63	5408965
Other (American Indian/AK Native, Asian/Pacific Islander)	Male	8170	T3b	N0	0	No radiation and/or cancer-directed surgery	Not recommended	Yes	77	998	No	No	No	Yes	Dead (attributable to this cancer dx)	1	Dead	One primary only	48	5409306
White	Male	8170	T1	N0	0	No radiation and/or cancer-directed surgery	Not recommended	Yes	999	10	Yes	No	No	No	Dead (attributable to this cancer dx)	28	Dead	One primary only	50	5409446
White	Male	8170	T4	N0	20	No radiation and/or cancer-directed surgery	Surgery performed	Yes	40	20	No	No	No	No	Dead (attributable to this cancer dx)	43	Dead	One primary only	75	5409813
White	Male	8170	T2	N0	0	No radiation and/or cancer-directed surgery	Not recommended, contraindicated due to other cond; autopsy only (1973-2002)	Yes	36	10	No	No	No	No	Dead (attributable to this cancer dx)	28	Dead	One primary only	75	5410098
Other (American Indian/AK Native, Asian/Pacific Islander)	Female	8170	T2	N0	51	No radiation and/or cancer-directed surgery	Surgery performed	Yes	33	999	No	No	No	No	Alive or dead of other cause	59	Alive	One primary only	53	5410292
White	Male	8170	T3b	N0	0	No radiation and/or cancer-directed surgery	Not recommended	No/Unknown	80	10	Yes	No	No	Yes	Dead (attributable to this cancer dx)	2	Dead	One primary only	53	5410438
White	Male	8170	T1	N0	61	No radiation and/or cancer-directed surgery	Surgery performed	Yes	16	10	No	No	No	No	Alive or dead of other cause	59	Alive	One primary only	55	5410442
Black	Male	8170	T2	N0	0	No radiation and/or cancer-directed surgery	Recommended, unknown if performed	No/Unknown	32	10	No	No	No	No	Dead (attributable to this cancer dx)	42	Dead	One primary only	64	5410499
Other (American Indian/AK Native, Asian/Pacific Islander)	Male	8170	T1	N0	0	No radiation and/or cancer-directed surgery	Not recommended	Yes	74	10	No	No	Yes	Yes	Dead (attributable to this cancer dx)	4	Dead	One primary only	72	5410558
Other (American Indian/AK Native, Asian/Pacific Islander)	Male	8170	T2	N0	0	No radiation and/or cancer-directed surgery	Not recommended	Yes	250	20	No	No	No	No	Dead (attributable to this cancer dx)	3	Dead	One primary only	65	5410646
White	Female	8170	T1	N0	0	No radiation and/or cancer-directed surgery	Not recommended	No/Unknown	27	20	No	No	No	No	Alive or dead of other cause	1	Alive	One primary only	66	5410706
White	Male	8170	T3a	NX	0	No radiation and/or cancer-directed surgery	Not recommended	No/Unknown	67	10	No	No	No	No	Alive or dead of other cause	0	Dead	One primary only	67	5410729
Other (American Indian/AK Native, Asian/Pacific Islander)	Female	8170	T1	N0	0	No radiation and/or cancer-directed surgery	Recommended but not performed, patient refused	No/Unknown	72	20	No	No	No	No	Alive or dead of other cause	51	Alive	One primary only	85	5410784
Other (American Indian/AK Native, Asian/Pacific Islander)	Female	8170	TX	N0	0	No radiation and/or cancer-directed surgery	Not recommended	No/Unknown	999	999	No	No	No	No	Alive or dead of other cause	0	Dead	One primary only	81	5410796
White	Female	8170	T2	NX	0	No radiation and/or cancer-directed surgery	Recommended, unknown if performed	Yes	29	10	No	No	No	No	Alive or dead of other cause	52	Alive	1st of 2 or more primaries	70	5410903
White	Male	8170	T3a	N0	0	No radiation and/or cancer-directed surgery	Not recommended	No/Unknown	96	10	No	No	No	No	Dead (attributable to this cancer dx)	0	Dead	One primary only	86	5411127
Other (American Indian/AK Native, Asian/Pacific Islander)	Male	8170	T3b	N0	0	No radiation and/or cancer-directed surgery	Not recommended	No/Unknown	28	20	No	No	No	No	Dead (attributable to this cancer dx)	1	Dead	One primary only	52	5411512
White	Male	8170	T1	N0	61	No radiation and/or cancer-directed surgery	Surgery performed	Yes	21	20	No	No	No	No	Alive or dead of other cause	53	Alive	One primary only	53	5411671
White	Male	8170	T3b	N0	0	No radiation and/or cancer-directed surgery	Not recommended	No/Unknown	999	10	No	No	No	Yes	Alive or dead of other cause	31	Alive	One primary only	60	5411679
Other (American Indian/AK Native, Asian/Pacific Islander)	Female	8170	T1	N1	0	No radiation and/or cancer-directed surgery	Not recommended	No/Unknown	153	20	No	No	No	No	Dead (attributable to this cancer dx)	9	Dead	One primary only	39	5411702
Other (American Indian/AK Native, Asian/Pacific Islander)	Male	8170	T4	N0	0	No radiation and/or cancer-directed surgery	Not recommended	No/Unknown	996	10	No	No	No	Yes	Dead (attributable to this cancer dx)	2	Dead	One primary only	73	5411977
Other (American Indian/AK Native, Asian/Pacific Islander)	Male	8170	T1	N0	0	No radiation and/or cancer-directed surgery	Not recommended	Yes	30	10	No	No	No	No	Dead (attributable to this cancer dx)	5	Dead	One primary only	56	5412062
White	Male	8170	T3b	N0	0	No radiation and/or cancer-directed surgery	Not recommended	Yes	86	10	No	No	No	No	Dead (attributable to this cancer dx)	2	Dead	One primary only	59	5412116
Other (American Indian/AK Native, Asian/Pacific Islander)	Male	8170	T1	N0	16	No radiation and/or cancer-directed surgery	Surgery performed	No/Unknown	18	10	No	No	No	No	Alive or dead of other cause	47	Alive	One primary only	61	5412417
White	Male	8170	T3b	N0	0	No radiation and/or cancer-directed surgery	Not recommended	No/Unknown	29	10	No	No	No	No	Dead (attributable to this cancer dx)	11	Dead	One primary only	76	5412442
Other (American Indian/AK Native, Asian/Pacific Islander)	Male	8170	T3b	NX	0	No radiation and/or cancer-directed surgery	Not recommended	No/Unknown	109	10	No	No	Yes	Yes	Dead (attributable to this cancer dx)	2	Dead	One primary only	61	5412461
Other (American Indian/AK Native, Asian/Pacific Islander)	Male	8170	T1	N0	16	No radiation and/or cancer-directed surgery	Surgery performed	Yes	20	10	No	No	No	No	Alive or dead of other cause	53	Alive	One primary only	69	5412655
White	Female	8170	T2	N0	0	No radiation and/or cancer-directed surgery	Not recommended	No/Unknown	48	20	No	No	No	No	Dead (attributable to this cancer dx)	1	Dead	One primary only	64	5412798
Other (American Indian/AK Native, Asian/Pacific Islander)	Male	8170	T1	N0	30	No radiation and/or cancer-directed surgery	Surgery performed	No/Unknown	45	10	No	No	No	No	Dead (attributable to this cancer dx)	18	Dead	One primary only	74	5413186
White	Male	8170	T2	N0	0	No radiation and/or cancer-directed surgery	Not recommended	No/Unknown	21	20	No	No	No	No	Dead (attributable to this cancer dx)	2	Dead	One primary only	49	5413299
White	Male	8170	T1	N0	0	No radiation and/or cancer-directed surgery	Not recommended	Yes	24	20	No	No	No	No	Dead (attributable to this cancer dx)	17	Dead	One primary only	51	5413305
White	Female	8170	T3b	N0	0	No radiation and/or cancer-directed surgery	Not recommended	Yes	29	20	No	No	No	No	Dead (attributable to this cancer dx)	22	Dead	One primary only	69	5413337
White	Male	8170	T2	N0	16	No radiation and/or cancer-directed surgery	Surgery performed	Yes	25	20	No	No	No	No	Dead (attributable to this cancer dx)	42	Dead	One primary only	62	5413509
White	Male	8170	T2	N0	16	No radiation and/or cancer-directed surgery	Surgery performed	Yes	29	10	No	No	No	No	Alive or dead of other cause	40	Dead	1st of 2 or more primaries	64	5413759
Other (American Indian/AK Native, Asian/Pacific Islander)	Female	8170	T2	N0	16	No radiation and/or cancer-directed surgery	Surgery performed	Yes	21	10	No	No	No	No	Alive or dead of other cause	53	Alive	One primary only	59	5413763
Other (American Indian/AK Native, Asian/Pacific Islander)	Female	8170	TX	N0	0	No radiation and/or cancer-directed surgery	Not recommended	No/Unknown	999	10	No	No	No	Yes	Dead (attributable to this cancer dx)	1	Dead	One primary only	77	5413795
Other (American Indian/AK Native, Asian/Pacific Islander)	Male	8170	T3b	N1	0	No radiation and/or cancer-directed surgery	Not recommended	Yes	33	10	No	No	No	No	Dead (attributable to this cancer dx)	2	Dead	One primary only	62	5413807
Other (American Indian/AK Native, Asian/Pacific Islander)	Male	8170	T2	N0	16	No radiation and/or cancer-directed surgery	Surgery performed	No/Unknown	34	10	No	No	No	No	Alive or dead of other cause	50	Alive	One primary only	55	5413993
Other (American Indian/AK Native, Asian/Pacific Islander)	Female	8170	T1	N0	0	No radiation and/or cancer-directed surgery	Not recommended	No/Unknown	999	20	No	No	No	No	Dead (attributable to this cancer dx)	12	Dead	One primary only	48	5414002
Black	Male	8170	T3a	N0	16	No radiation and/or cancer-directed surgery	Surgery performed	Yes	100	10	No	No	No	No	Dead (attributable to this cancer dx)	11	Dead	One primary only	68	5414003
Other (American Indian/AK Native, Asian/Pacific Islander)	Male	8170	T1	N0	0	No radiation and/or cancer-directed surgery	Not recommended	Yes	121	10	No	No	No	No	Dead (attributable to this cancer dx)	16	Dead	One primary only	59	5414005
White	Male	8170	T1	N0	16	No radiation and/or cancer-directed surgery	Surgery performed	Yes	18	20	No	No	No	No	Alive or dead of other cause	58	Alive	One primary only	64	5414013
White	Male	8170	T3b	N0	0	No radiation and/or cancer-directed surgery	Not recommended	No/Unknown	140	10	No	No	No	No	Dead (attributable to this cancer dx)	0	Dead	One primary only	72	5414239
Other (American Indian/AK Native, Asian/Pacific Islander)	Female	8170	TX	NX	0	No radiation and/or cancer-directed surgery	Not recommended	No/Unknown	999	10	No	No	No	Yes	Dead (attributable to this cancer dx)	0	Dead	One primary only	82	5414379
Other (American Indian/AK Native, Asian/Pacific Islander)	Male	8170	T3a	N0	0	No radiation and/or cancer-directed surgery	Not recommended	No/Unknown	68	10	No	No	No	No	Dead (attributable to this cancer dx)	1	Dead	One primary only	87	5414468
White	Male	8170	T2	N0	0	No radiation and/or cancer-directed surgery	Not recommended	Yes	21	20	No	No	No	No	Dead (attributable to this cancer dx)	32	Dead	1st of 2 or more primaries	50	5414471
Other (American Indian/AK Native, Asian/Pacific Islander)	Female	8170	T3a	N0	0	No radiation and/or cancer-directed surgery	Not recommended	No/Unknown	96	10	No	No	No	No	Dead (attributable to this cancer dx)	1	Dead	One primary only	86	5414472
Black	Male	8170	T3b	N0	0	No radiation and/or cancer-directed surgery	Not recommended	No/Unknown	86	10	No	No	No	No	Dead (attributable to this cancer dx)	3	Dead	One primary only	59	5414568
Other (American Indian/AK Native, Asian/Pacific Islander)	Female	8170	T3a	N0	0	No radiation and/or cancer-directed surgery	Not recommended	No/Unknown	999	10	No	No	No	No	Dead (attributable to this cancer dx)	0	Dead	One primary only	53	5414576
Other (American Indian/AK Native, Asian/Pacific Islander)	Female	8170	T4	N0	0	No radiation and/or cancer-directed surgery	Not recommended	Yes	70	10	No	No	No	No	Dead (attributable to this cancer dx)	12	Dead	One primary only	73	5414598
Other (American Indian/AK Native, Asian/Pacific Islander)	Male	8170	T3a	N0	0	No radiation and/or cancer-directed surgery	Not recommended	Yes	100	10	No	No	No	No	Dead (attributable to this cancer dx)	7	Dead	One primary only	55	5414605
White	Male	8170	T1	N0	51	No radiation and/or cancer-directed surgery	Surgery performed	No/Unknown	90	998	No	No	No	No	Alive or dead of other cause	49	Alive	One primary only	61	5414798
White	Male	8170	T1	N0	16	No radiation and/or cancer-directed surgery	Surgery performed	Yes	21	10	No	No	No	No	Alive or dead of other cause	51	Alive	One primary only	61	5414830
Other (American Indian/AK Native, Asian/Pacific Islander)	Male	8170	T1	N0	16	No radiation and/or cancer-directed surgery	Surgery performed	No/Unknown	30	10	No	No	No	No	Alive or dead of other cause	50	Alive	One primary only	45	5414833
White	Male	8170	T1	N0	0	No radiation and/or cancer-directed surgery	Not recommended	No/Unknown	31	20	No	No	No	No	Alive or dead of other cause	0	Dead	One primary only	56	5414858
Black	Male	8170	T2	N0	0	No radiation and/or cancer-directed surgery	Not recommended	Yes	21	20	No	No	No	No	Dead (attributable to this cancer dx)	9	Dead	One primary only	50	5415018
White	Male	8170	T1	N0	0	No radiation and/or cancer-directed surgery	Not recommended	Yes	999	10	No	No	No	No	Dead (attributable to this cancer dx)	3	Dead	One primary only	56	5415069
Black	Male	8170	T2	N0	0	No radiation and/or cancer-directed surgery	Not recommended	No/Unknown	999	998	No	No	No	No	Dead (attributable to this cancer dx)	0	Dead	One primary only	60	5415163
White	Female	8170	T2	N0	16	No radiation and/or cancer-directed surgery	Surgery performed	No/Unknown	25	10	No	No	No	No	Dead (attributable to this cancer dx)	26	Dead	One primary only	56	5415234
White	Male	8170	T1	N0	0	No radiation and/or cancer-directed surgery	Not recommended	Yes	21	10	No	No	No	No	Dead (attributable to this cancer dx)	7	Dead	One primary only	61	5415286
White	Male	8170	T2	N0	16	No radiation and/or cancer-directed surgery	Surgery performed	Yes	20	10	No	No	No	No	Dead (attributable to this cancer dx)	6	Dead	One primary only	56	5415357
Other (American Indian/AK Native, Asian/Pacific Islander)	Male	8170	T1	N0	0	No radiation and/or cancer-directed surgery	Not recommended	Yes	103	10	No	No	No	No	Dead (attributable to this cancer dx)	3	Dead	One primary only	57	5415360
White	Male	8170	T3a	N0	30	No radiation and/or cancer-directed surgery	Surgery performed	No/Unknown	80	10	No	No	No	No	Alive or dead of other cause	32	Alive	One primary only	84	5415419
Black	Female	8170	T1	N0	20	No radiation and/or cancer-directed surgery	Surgery performed	No/Unknown	31	10	No	No	No	No	Alive or dead of other cause	39	Dead	One primary only	53	5415520
White	Male	8170	T3a	N0	0	No radiation and/or cancer-directed surgery	Not recommended	No/Unknown	92	998	Yes	No	No	No	Dead (attributable to this cancer dx)	3	Dead	One primary only	90	5415557
White	Male	8170	T2	N0	10	No radiation and/or cancer-directed surgery	Surgery performed	Yes	35	10	No	No	No	No	Alive or dead of other cause	44	Alive	One primary only	53	5415573
Other (American Indian/AK Native, Asian/Pacific Islander)	Male	8170	T3a	N0	0	No radiation and/or cancer-directed surgery	Not performed, patient died prior to recommended surgery	No/Unknown	78	998	No	No	No	No	Alive or dead of other cause	0	Dead	One primary only	54	5415873
Black	Male	8170	T1	N0	16	No radiation and/or cancer-directed surgery	Surgery performed	No/Unknown	12	20	No	No	No	No	Dead (attributable to this cancer dx)	25	Dead	One primary only	58	5415913
White	Male	8170	T2	N0	61	No radiation and/or cancer-directed surgery	Surgery performed	Yes	36	10	No	No	No	No	Alive or dead of other cause	54	Alive	One primary only	65	5416088
White	Male	8170	T1	N0	0	No radiation and/or cancer-directed surgery	Not recommended	Yes	22	10	No	No	No	No	Dead (attributable to this cancer dx)	36	Dead	One primary only	67	5416149
White	Female	8170	T3b	N0	0	No radiation and/or cancer-directed surgery	Not recommended	No/Unknown	7	20	No	No	No	No	Dead (attributable to this cancer dx)	4	Dead	One primary only	79	5416189
White	Male	8174	T1	N0	16	No radiation and/or cancer-directed surgery	Surgery performed	Yes	13	10	No	No	No	No	Alive or dead of other cause	52	Alive	One primary only	62	5416260
White	Male	8170	T1	N0	0	No radiation and/or cancer-directed surgery	Not recommended	No/Unknown	50	10	No	No	No	No	Dead (attributable to this cancer dx)	0	Dead	One primary only	51	5416522
White	Male	8170	T2	N0	61	No radiation and/or cancer-directed surgery	Surgery performed	Yes	24	10	No	No	No	No	Alive or dead of other cause	50	Alive	One primary only	58	5416609
Other (American Indian/AK Native, Asian/Pacific Islander)	Male	8170	T1	N0	0	No radiation and/or cancer-directed surgery	Not recommended	Yes	999	20	No	No	No	No	Alive or dead of other cause	34	Dead	1st of 2 or more primaries	79	5416637
White	Male	8170	T3a	N0	0	No radiation and/or cancer-directed surgery	Not recommended	Yes	60	10	No	No	No	No	Dead (attributable to this cancer dx)	24	Dead	One primary only	65	5416642
Black	Female	8170	TX	NX	0	No radiation and/or cancer-directed surgery	Not recommended	Yes	999	999	No	No	No	No	Dead (attributable to this cancer dx)	19	Dead	One primary only	51	5416648
White	Male	8170	T2	N0	16	No radiation and/or cancer-directed surgery	Surgery performed	Yes	21	10	No	No	No	No	Dead (attributable to this cancer dx)	8	Dead	One primary only	54	5416649
Black	Male	8170	T1	N0	0	No radiation and/or cancer-directed surgery	Not recommended	No/Unknown	15	10	No	No	No	No	Dead (attributable to this cancer dx)	26	Dead	One primary only	34	5416780
Other (American Indian/AK Native, Asian/Pacific Islander)	Male	8170	T3b	N0	0	No radiation and/or cancer-directed surgery	Not recommended	No/Unknown	69	10	No	No	No	No	Dead (attributable to this cancer dx)	0	Dead	One primary only	68	5416896
White	Male	8170	T1	N0	0	No radiation and/or cancer-directed surgery	Not recommended	Yes	23	20	No	No	No	No	Alive or dead of other cause	54	Alive	One primary only	54	5417060
White	Male	8170	T2	N0	61	No radiation and/or cancer-directed surgery	Surgery performed	No/Unknown	14	20	No	No	No	No	Alive or dead of other cause	52	Alive	One primary only	64	5417062
White	Male	8170	T3b	N0	0	No radiation and/or cancer-directed surgery	Not recommended	No/Unknown	999	998	No	No	No	No	Alive or dead of other cause	12	Alive	One primary only	69	5417318
White	Male	8170	T2	N0	0	No radiation and/or cancer-directed surgery	Not recommended	Yes	40	10	No	No	No	No	Dead (attributable to this cancer dx)	22	Dead	One primary only	54	5417382
White	Male	8170	T1	N0	0	No radiation and/or cancer-directed surgery	Not recommended	No/Unknown	37	20	No	No	No	No	Dead (attributable to this cancer dx)	12	Dead	One primary only	63	5417426
Black	Female	8170	T1	N0	36	No radiation and/or cancer-directed surgery	Surgery performed	No/Unknown	40	20	No	No	No	No	Dead (attributable to this cancer dx)	25	Dead	One primary only	61	5417448
Other (American Indian/AK Native, Asian/Pacific Islander)	Male	8170	T3a	NX	0	No radiation and/or cancer-directed surgery	Not recommended	No/Unknown	100	10	Yes	No	Yes	Yes	Dead (attributable to this cancer dx)	0	Dead	One primary only	73	5417485
White	Female	8170	T1	N0	0	No radiation and/or cancer-directed surgery	Not recommended	Yes	47	10	No	No	No	No	Dead (attributable to this cancer dx)	19	Dead	One primary only	79	5417733
White	Male	8170	T3b	N0	0	No radiation and/or cancer-directed surgery	Not recommended	No/Unknown	65	997	No	No	No	No	Alive or dead of other cause	0	Dead	One primary only	76	5417747
Other (American Indian/AK Native, Asian/Pacific Islander)	Female	8170	T3b	N0	0	No radiation and/or cancer-directed surgery	Not recommended	No/Unknown	42	10	No	No	No	No	Dead (attributable to this cancer dx)	0	Dead	One primary only	97	5417804
Black	Male	8170	T1	N0	0	No radiation and/or cancer-directed surgery	Not recommended	No/Unknown	132	10	No	No	No	Yes	Dead (attributable to this cancer dx)	0	Dead	One primary only	70	5417890
White	Female	8170	T2	N0	16	No radiation and/or cancer-directed surgery	Surgery performed	No/Unknown	17	10	No	No	No	No	Alive or dead of other cause	50	Alive	One primary only	73	5418092
Black	Male	8170	T1	N0	0	No radiation and/or cancer-directed surgery	Not recommended	No/Unknown	47	10	No	No	No	No	Dead (attributable to this cancer dx)	13	Dead	One primary only	61	5418402
Other (American Indian/AK Native, Asian/Pacific Islander)	Male	8170	T1	N0	21	No radiation and/or cancer-directed surgery	Surgery performed	No/Unknown	15	10	No	No	No	No	Alive or dead of other cause	53	Alive	One primary only	63	5418467
White	Male	8170	T2	N0	0	No radiation and/or cancer-directed surgery	Not recommended	Yes	14	10	No	No	No	No	Alive or dead of other cause	50	Alive	One primary only	59	5418623
Other (American Indian/AK Native, Asian/Pacific Islander)	Male	8170	T1	N0	0	No radiation and/or cancer-directed surgery	Not recommended	Yes	77	20	No	No	No	No	Alive or dead of other cause	51	Alive	One primary only	55	5418722
White	Male	8170	T3a	N0	0	No radiation and/or cancer-directed surgery	Not recommended	Yes	80	10	No	No	No	No	Dead (attributable to this cancer dx)	6	Dead	One primary only	69	5418929
White	Male	8170	T1	N1	0	No radiation and/or cancer-directed surgery	Not recommended	No/Unknown	999	998	No	No	No	Yes	Dead (attributable to this cancer dx)	0	Dead	One primary only	58	5419158
Other (American Indian/AK Native, Asian/Pacific Islander)	Male	8170	T3a	N0	0	No radiation and/or cancer-directed surgery	Not recommended	Yes	80	10	No	No	No	No	Dead (attributable to this cancer dx)	26	Dead	One primary only	79	5419212
Other (American Indian/AK Native, Asian/Pacific Islander)	Female	8170	T2	N0	61	No radiation and/or cancer-directed surgery	Surgery performed	Yes	30	10	No	No	No	No	Dead (attributable to this cancer dx)	28	Dead	One primary only	65	5419213
White	Female	8170	T1	NX	0	No radiation and/or cancer-directed surgery	Not recommended	Yes	28	999	No	No	No	No	Dead (attributable to this cancer dx)	34	Dead	One primary only	71	5419216
Other (American Indian/AK Native, Asian/Pacific Islander)	Male	8170	T2	N0	61	No radiation and/or cancer-directed surgery	Surgery performed	No/Unknown	28	10	No	No	No	No	Alive or dead of other cause	52	Alive	One primary only	58	5419574
White	Male	8170	TX	N0	0	No radiation and/or cancer-directed surgery	Not recommended	No/Unknown	999	10	No	No	No	No	Dead (attributable to this cancer dx)	0	Dead	One primary only	69	5419687
White	Male	8170	T2	N0	61	No radiation and/or cancer-directed surgery	Surgery performed	No/Unknown	33	20	No	No	No	No	Alive or dead of other cause	50	Alive	One primary only	53	5419734
Other (American Indian/AK Native, Asian/Pacific Islander)	Male	8170	T1	N0	25	No radiation and/or cancer-directed surgery	Surgery performed	Yes	30	10	No	No	No	No	Dead (attributable to this cancer dx)	43	Dead	One primary only	76	5419789
White	Male	8170	T1	N0	0	No radiation and/or cancer-directed surgery	Not recommended	Yes	23	20	No	No	No	No	Alive or dead of other cause	51	Alive	One primary only	72	5419868
Other (American Indian/AK Native, Asian/Pacific Islander)	Male	8170	T1	N0	16	No radiation and/or cancer-directed surgery	Surgery performed	Yes	48	10	No	No	No	No	Alive or dead of other cause	50	Alive	One primary only	78	5419872
Other (American Indian/AK Native, Asian/Pacific Islander)	Female	8170	T3a	N0	0	No radiation and/or cancer-directed surgery	Not recommended	No/Unknown	95	20	No	No	No	No	Alive or dead of other cause	49	Alive	One primary only	75	5419920
White	Male	8170	T4	N0	0	No radiation and/or cancer-directed surgery	Not recommended	Yes	84	10	No	No	No	No	Dead (attributable to this cancer dx)	2	Dead	One primary only	58	5419929
White	Male	8170	T2	N0	0	No radiation and/or cancer-directed surgery	Not recommended	No/Unknown	24	10	No	No	No	No	Alive or dead of other cause	34	Dead	One primary only	56	5420122
Other (American Indian/AK Native, Asian/Pacific Islander)	Male	8170	T1	N0	16	No radiation and/or cancer-directed surgery	Surgery performed	No/Unknown	8	10	No	No	No	No	Alive or dead of other cause	49	Alive	One primary only	55	5420125
White	Male	8170	T2	N0	0	No radiation and/or cancer-directed surgery	Not recommended	No/Unknown	25	10	No	No	No	No	Dead (attributable to this cancer dx)	19	Dead	One primary only	80	5420166
White	Female	8170	T1	NX	0	No radiation and/or cancer-directed surgery	Not recommended	No/Unknown	130	10	No	No	No	No	Dead (attributable to this cancer dx)	2	Dead	One primary only	78	5420213
Other (American Indian/AK Native, Asian/Pacific Islander)	Male	8170	T3b	N1	0	No radiation and/or cancer-directed surgery	Not recommended	Yes	13	10	No	No	No	Yes	Dead (attributable to this cancer dx)	1	Dead	One primary only	45	5420231
White	Male	8170	TX	N0	0	No radiation and/or cancer-directed surgery	Not recommended	No/Unknown	90	10	No	No	No	Yes	Dead (attributable to this cancer dx)	1	Dead	One primary only	51	5420627
White	Female	8170	T1	NX	0	No radiation and/or cancer-directed surgery	Not recommended	No/Unknown	36	999	No	No	No	No	Alive or dead of other cause	35	Dead	One primary only	82	5420823
Other (American Indian/AK Native, Asian/Pacific Islander)	Male	8170	T1	N0	16	No radiation and/or cancer-directed surgery	Surgery performed	No/Unknown	30	10	No	No	No	No	Alive or dead of other cause	49	Alive	1st of 2 or more primaries	53	5420994
White	Male	8170	T1	N1	0	No radiation and/or cancer-directed surgery	Not recommended	No/Unknown	130	10	No	No	No	No	Alive or dead of other cause	0	Alive	One primary only	86	5421130
White	Male	8170	T2	N0	0	No radiation and/or cancer-directed surgery	Not recommended	Yes	50	20	No	No	No	No	Dead (attributable to this cancer dx)	7	Dead	One primary only	63	5421204
Other (American Indian/AK Native, Asian/Pacific Islander)	Male	8170	T1	N0	0	No radiation and/or cancer-directed surgery	Not recommended	No/Unknown	999	999	No	No	No	No	Alive or dead of other cause	2	Alive	One primary only	62	5421266
Black	Male	8170	T3a	N0	0	No radiation and/or cancer-directed surgery	Not recommended, contraindicated due to other cond; autopsy only (1973-2002)	Yes	130	10	No	No	No	No	Dead (attributable to this cancer dx)	11	Dead	One primary only	65	5421284
White	Male	8170	T2	N0	51	No radiation and/or cancer-directed surgery	Surgery performed	No/Unknown	999	10	No	No	No	No	Dead (attributable to this cancer dx)	1	Dead	1st of 2 or more primaries	65	5421347
Black	Male	8170	T1	N0	61	No radiation and/or cancer-directed surgery	Surgery performed	Yes	17	10	No	No	No	No	Alive or dead of other cause	51	Alive	One primary only	61	5421370
White	Female	8170	T2	N0	61	No radiation and/or cancer-directed surgery	Surgery performed	Yes	30	10	No	No	No	No	Alive or dead of other cause	51	Alive	One primary only	67	5421631
White	Male	8170	T3a	N0	0	No radiation and/or cancer-directed surgery	Not recommended	Yes	200	10	No	No	No	No	Dead (attributable to this cancer dx)	5	Dead	One primary only	76	5421953
White	Male	8170	T2	N0	16	No radiation and/or cancer-directed surgery	Surgery performed	No/Unknown	22	10	No	No	No	No	Dead (attributable to this cancer dx)	41	Dead	One primary only	55	5422018
Other (American Indian/AK Native, Asian/Pacific Islander)	Male	8170	T2	N0	36	No radiation and/or cancer-directed surgery	Surgery performed	No/Unknown	28	20	No	No	No	No	Alive or dead of other cause	49	Alive	One primary only	63	5422251
Black	Female	8170	T1	N0	10	Radiation after surgery	Surgery performed	No/Unknown	999	998	Yes	No	No	No	Dead (attributable to this cancer dx)	8	Dead	One primary only	56	5422361
Other (American Indian/AK Native, Asian/Pacific Islander)	Female	8170	T3a	N0	0	No radiation and/or cancer-directed surgery	Not recommended	Yes	134	10	No	No	No	No	Dead (attributable to this cancer dx)	11	Dead	One primary only	32	5422364
Black	Male	8170	T2	N0	16	No radiation and/or cancer-directed surgery	Surgery performed	Yes	31	10	No	No	No	No	Alive or dead of other cause	23	Dead	One primary only	70	5422748
White	Male	8170	T3a	N0	0	No radiation and/or cancer-directed surgery	Recommended but not performed, unknown reason	No/Unknown	78	10	No	No	No	No	Dead (attributable to this cancer dx)	15	Dead	One primary only	60	5422838
Black	Male	8170	T2	N0	21	No radiation and/or cancer-directed surgery	Surgery performed	No/Unknown	37	10	No	No	No	No	Alive or dead of other cause	47	Alive	One primary only	58	5422845
White	Male	8170	T1	N0	22	No radiation and/or cancer-directed surgery	Surgery performed	No/Unknown	60	10	No	No	No	No	Alive or dead of other cause	5	Dead	One primary only	64	5422856
Other (American Indian/AK Native, Asian/Pacific Islander)	Female	8170	T1	N0	16	No radiation and/or cancer-directed surgery	Surgery performed	No/Unknown	20	10	No	No	No	No	Alive or dead of other cause	48	Alive	One primary only	67	5422937
Other (American Indian/AK Native, Asian/Pacific Islander)	Female	8170	T3a	N0	0	No radiation and/or cancer-directed surgery	Recommended but not performed, patient refused	No/Unknown	127	10	No	No	No	No	Dead (attributable to this cancer dx)	0	Dead	One primary only	80	5422939
Other (American Indian/AK Native, Asian/Pacific Islander)	Female	8170	T1	N0	0	No radiation and/or cancer-directed surgery	Not recommended	Yes	37	20	No	No	No	No	Alive or dead of other cause	51	Alive	One primary only	57	5422941
Other (American Indian/AK Native, Asian/Pacific Islander)	Male	8170	T1	N0	0	No radiation and/or cancer-directed surgery	Not recommended	No/Unknown	15	20	No	No	No	No	Dead (attributable to this cancer dx)	1	Dead	One primary only	62	5423401
Other (American Indian/AK Native, Asian/Pacific Islander)	Male	8170	T1	N0	61	No radiation and/or cancer-directed surgery	Surgery performed	Yes	27	10	No	No	No	No	Alive or dead of other cause	49	Alive	One primary only	54	5423436
Other (American Indian/AK Native, Asian/Pacific Islander)	Male	8170	T1	NX	0	No radiation and/or cancer-directed surgery	Not recommended	Yes	28	20	No	No	No	No	Alive or dead of other cause	53	Alive	One primary only	54	5423457
White	Male	8170	T1	N0	0	No radiation and/or cancer-directed surgery	Not recommended	Yes	25	10	No	No	No	No	Alive or dead of other cause	14	Dead	One primary only	66	5423459
White	Male	8170	T1	N0	16	No radiation and/or cancer-directed surgery	Surgery performed	No/Unknown	20	20	No	No	No	No	Alive or dead of other cause	45	Dead	One primary only	58	5423768
Black	Male	8170	T4	N0	0	No radiation and/or cancer-directed surgery	Not recommended	Yes	999	10	No	No	No	No	Dead (attributable to this cancer dx)	10	Dead	One primary only	59	5423770
White	Male	8170	T2	N0	16	No radiation and/or cancer-directed surgery	Surgery performed	No/Unknown	25	10	No	No	No	No	Dead (attributable to this cancer dx)	19	Dead	1st of 2 or more primaries	71	5423779
Other (American Indian/AK Native, Asian/Pacific Islander)	Male	8170	TX	N1	10	No radiation and/or cancer-directed surgery	Surgery performed	No/Unknown	999	10	No	No	No	No	Alive or dead of other cause	48	Alive	One primary only	62	5423950
White	Male	8170	T1	N0	0	No radiation and/or cancer-directed surgery	Not recommended	No/Unknown	48	20	No	No	No	No	Dead (attributable to this cancer dx)	2	Dead	One primary only	58	5424071
White	Male	8170	T3b	N0	0	No radiation and/or cancer-directed surgery	Not recommended	Yes	58	10	No	No	No	Yes	Dead (attributable to this cancer dx)	14	Dead	One primary only	73	5424262
White	Male	8170	T2	N0	0	No radiation and/or cancer-directed surgery	Not recommended	Yes	41	10	No	No	No	No	Dead (attributable to this cancer dx)	21	Dead	One primary only	85	5424264
Black	Male	8170	T2	N1	0	No radiation and/or cancer-directed surgery	Not recommended	Yes	36	10	No	No	No	No	Dead (attributable to this cancer dx)	16	Dead	One primary only	54	5424483
Other (American Indian/AK Native, Asian/Pacific Islander)	Male	8170	T1	N0	0	No radiation and/or cancer-directed surgery	Not recommended	Yes	60	10	No	No	No	No	Dead (attributable to this cancer dx)	10	Dead	One primary only	56	5424727
White	Male	8170	T1	N0	61	No radiation and/or cancer-directed surgery	Surgery performed	Yes	35	20	No	No	No	No	Alive or dead of other cause	48	Alive	One primary only	60	5424728
Other (American Indian/AK Native, Asian/Pacific Islander)	Female	8170	T1	N0	0	No radiation and/or cancer-directed surgery	Not recommended	Yes	71	10	No	No	No	No	Dead (attributable to this cancer dx)	32	Dead	One primary only	58	5424814
Other (American Indian/AK Native, Asian/Pacific Islander)	Male	8170	T3b	N0	0	No radiation and/or cancer-directed surgery	Not recommended	Yes	80	10	No	No	No	No	Dead (attributable to this cancer dx)	25	Dead	One primary only	79	5424861
White	Male	8170	T3a	N0	0	No radiation and/or cancer-directed surgery	Not recommended	Yes	150	10	No	No	No	No	Dead (attributable to this cancer dx)	13	Dead	One primary only	51	5424863
Other (American Indian/AK Native, Asian/Pacific Islander)	Female	8170	T3a	N0	0	No radiation and/or cancer-directed surgery	Not recommended	Yes	55	20	No	No	No	No	Alive or dead of other cause	51	Alive	One primary only	77	5424909
White	Female	8170	T1	N0	0	No radiation and/or cancer-directed surgery	Not recommended	No/Unknown	32	999	No	No	No	No	Alive or dead of other cause	0	Dead	One primary only	77	5425283
White	Female	8170	T1	N0	0	No radiation and/or cancer-directed surgery	Not recommended	No/Unknown	13	998	No	No	No	No	Alive or dead of other cause	48	Alive	One primary only	54	5425333
White	Male	8170	T1	N0	15	No radiation and/or cancer-directed surgery	Surgery performed	Yes	20	10	No	No	No	No	Dead (attributable to this cancer dx)	43	Dead	One primary only	52	5425437
Other (American Indian/AK Native, Asian/Pacific Islander)	Male	8170	T1	N0	0	No radiation and/or cancer-directed surgery	Not recommended	Yes	15	20	No	No	No	No	Alive or dead of other cause	54	Alive	One primary only	56	5425449
Other (American Indian/AK Native, Asian/Pacific Islander)	Male	8170	T2	N0	0	No radiation and/or cancer-directed surgery	Not recommended	Yes	35	10	No	No	No	No	Alive or dead of other cause	54	Alive	One primary only	61	5425454
White	Male	8170	T1	N0	0	No radiation and/or cancer-directed surgery	Recommended but not performed, patient refused	No/Unknown	37	10	No	No	No	No	Dead (attributable to this cancer dx)	26	Dead	One primary only	61	5425459
Other (American Indian/AK Native, Asian/Pacific Islander)	Male	8170	T1	N0	16	No radiation and/or cancer-directed surgery	Surgery performed	Yes	60	20	No	No	No	No	Alive or dead of other cause	69	Alive	One primary only	63	5425461
Black	Female	8170	T1	N0	0	No radiation and/or cancer-directed surgery	Not recommended	Yes	25	10	No	No	No	No	Dead (attributable to this cancer dx)	7	Dead	One primary only	51	5425586
White	Male	8170	T1	N0	0	No radiation and/or cancer-directed surgery	Not recommended	Yes	44	20	No	No	No	No	Alive or dead of other cause	51	Alive	One primary only	58	5425631
White	Male	8170	T1	N0	0	No radiation and/or cancer-directed surgery	Not recommended	No/Unknown	999	10	No	No	Yes	No	Dead (attributable to this cancer dx)	1	Dead	One primary only	65	5426025
White	Male	8170	T1	N0	0	No radiation and/or cancer-directed surgery	Not recommended	No/Unknown	999	999	No	No	No	No	Alive or dead of other cause	0	Alive	One primary only	68	5426035
White	Male	8170	T1	N0	61	No radiation and/or cancer-directed surgery	Surgery performed	Yes	45	20	No	No	No	No	Alive or dead of other cause	53	Alive	One primary only	65	5426097
Other (American Indian/AK Native, Asian/Pacific Islander)	Male	8170	T2	N0	0	No radiation and/or cancer-directed surgery	Not recommended	No/Unknown	31	20	No	No	No	No	Dead (attributable to this cancer dx)	13	Dead	One primary only	75	5426107
White	Male	8170	T2	N0	16	No radiation and/or cancer-directed surgery	Surgery performed	Yes	23	10	No	No	No	No	Alive or dead of other cause	50	Alive	One primary only	50	5426290
Other (American Indian/AK Native, Asian/Pacific Islander)	Male	8170	T1	N0	51	No radiation and/or cancer-directed surgery	Surgery performed	No/Unknown	30	10	No	No	No	No	Alive or dead of other cause	48	Alive	One primary only	54	5426380
Other (American Indian/AK Native, Asian/Pacific Islander)	Female	8170	T1	N0	0	No radiation and/or cancer-directed surgery	Not recommended	Yes	65	10	No	No	No	No	Dead (attributable to this cancer dx)	16	Dead	One primary only	68	5426396
Other (American Indian/AK Native, Asian/Pacific Islander)	Male	8170	T4	N0	0	No radiation and/or cancer-directed surgery	Not recommended	Yes	999	10	No	No	No	Yes	Dead (attributable to this cancer dx)	1	Dead	One primary only	68	5426517
Black	Male	8170	T1	N0	0	No radiation and/or cancer-directed surgery	Recommended but not performed, patient refused	No/Unknown	35	997	No	No	No	No	Dead (attributable to this cancer dx)	15	Dead	One primary only	56	5426604
Other (American Indian/AK Native, Asian/Pacific Islander)	Male	8170	T1	N0	0	No radiation and/or cancer-directed surgery	Not recommended	No/Unknown	53	10	No	No	No	No	Dead (attributable to this cancer dx)	7	Dead	One primary only	72	5426655
Black	Male	8170	T1	N0	16	No radiation and/or cancer-directed surgery	Surgery performed	No/Unknown	31	10	No	No	No	No	Dead (attributable to this cancer dx)	4	Dead	One primary only	56	5426702
White	Female	8170	T1	N0	61	No radiation and/or cancer-directed surgery	Surgery performed	No/Unknown	35	20	No	No	No	No	Alive or dead of other cause	48	Alive	One primary only	39	5426775
Other (American Indian/AK Native, Asian/Pacific Islander)	Female	8170	T1	N0	0	No radiation and/or cancer-directed surgery	Not recommended	No/Unknown	999	999	No	No	No	No	Dead (attributable to this cancer dx)	0	Dead	One primary only	72	5427165
White	Male	8170	T2	N0	0	No radiation and/or cancer-directed surgery	Not recommended	Yes	36	20	No	No	No	No	Dead (attributable to this cancer dx)	6	Dead	One primary only	71	5427432
Black	Male	8170	T2	N0	0	No radiation and/or cancer-directed surgery	Not recommended	No/Unknown	45	10	No	No	No	No	Dead (attributable to this cancer dx)	0	Dead	One primary only	53	5427626
White	Male	8170	T1	N0	0	No radiation and/or cancer-directed surgery	Not recommended	No/Unknown	999	10	No	No	No	No	Dead (attributable to this cancer dx)	0	Dead	One primary only	54	5427717
White	Male	8170	T3a	N0	0	No radiation and/or cancer-directed surgery	Not recommended	No/Unknown	54	20	No	No	No	No	Dead (attributable to this cancer dx)	0	Dead	One primary only	59	5427907
White	Male	8170	TX	N0	0	No radiation and/or cancer-directed surgery	Not recommended	No/Unknown	999	20	No	No	No	No	Alive or dead of other cause	27	Dead	One primary only	72	5428103
Black	Male	8170	T1	N0	16	No radiation and/or cancer-directed surgery	Surgery performed	No/Unknown	17	10	No	No	No	No	Alive or dead of other cause	26	Dead	1st of 2 or more primaries	59	5428174
Black	Female	8170	T2	N0	10	No radiation and/or cancer-directed surgery	Surgery performed	No/Unknown	36	10	No	No	No	No	Dead (attributable to this cancer dx)	17	Dead	One primary only	61	5428177
Other (American Indian/AK Native, Asian/Pacific Islander)	Male	8170	T3b	N1	0	No radiation and/or cancer-directed surgery	Not recommended	Yes	999	20	No	No	No	Yes	Dead (attributable to this cancer dx)	2	Dead	One primary only	51	5428179
Other (American Indian/AK Native, Asian/Pacific Islander)	Male	8170	T1	N0	0	No radiation and/or cancer-directed surgery	Not recommended	No/Unknown	72	10	No	No	No	No	Alive or dead of other cause	8	Dead	One primary only	95	5428324
White	Male	8170	T3b	N0	0	No radiation and/or cancer-directed surgery	Not recommended	Yes	44	10	No	No	No	No	Dead (attributable to this cancer dx)	4	Dead	One primary only	52	5428325
Black	Female	8170	T3b	N0	0	No radiation and/or cancer-directed surgery	Not recommended	No/Unknown	95	10	No	No	No	No	Dead (attributable to this cancer dx)	1	Dead	One primary only	55	5428349
Other (American Indian/AK Native, Asian/Pacific Islander)	Male	8170	T3a	N0	0	No radiation and/or cancer-directed surgery	Not recommended	No/Unknown	97	10	No	No	No	No	Dead (attributable to this cancer dx)	3	Dead	One primary only	59	5428540
White	Male	8170	T1	N0	0	No radiation and/or cancer-directed surgery	Not recommended	No/Unknown	19	10	No	No	No	No	Alive or dead of other cause	4	Dead	One primary only	38	5428622
Black	Male	8170	T3a	N0	0	No radiation and/or cancer-directed surgery	Not recommended	No/Unknown	70	999	No	No	No	No	Dead (attributable to this cancer dx)	14	Dead	One primary only	63	5429299
Other (American Indian/AK Native, Asian/Pacific Islander)	Female	8170	TX	NX	0	No radiation and/or cancer-directed surgery	Not recommended	No/Unknown	150	10	No	No	No	No	Dead (attributable to this cancer dx)	0	Dead	One primary only	74	5429305
White	Male	8170	T2	N0	0	No radiation and/or cancer-directed surgery	Not recommended	Yes	32	10	No	No	No	No	Dead (attributable to this cancer dx)	34	Dead	One primary only	55	5429329
Other (American Indian/AK Native, Asian/Pacific Islander)	Female	8170	T1	N0	0	No radiation and/or cancer-directed surgery	Not recommended	No/Unknown	56	998	No	No	No	No	Dead (attributable to this cancer dx)	0	Dead	One primary only	89	5429656
White	Male	8170	T1	N0	23	No radiation and/or cancer-directed surgery	Surgery performed	No/Unknown	20	10	No	No	No	No	Dead (attributable to this cancer dx)	15	Dead	One primary only	56	5429730
White	Female	8170	T1	N0	21	No radiation and/or cancer-directed surgery	Surgery performed	No/Unknown	15	999	No	No	No	No	Alive or dead of other cause	3	Dead	One primary only	56	5429890
Other (American Indian/AK Native, Asian/Pacific Islander)	Male	8170	T3b	N0	0	No radiation and/or cancer-directed surgery	Not recommended	Yes	170	20	No	No	No	No	Dead (attributable to this cancer dx)	10	Dead	One primary only	57	5430033
White	Male	8170	T1	N0	0	No radiation and/or cancer-directed surgery	Not recommended	No/Unknown	23	10	No	No	No	No	Alive or dead of other cause	3	Dead	One primary only	75	5430209
Other (American Indian/AK Native, Asian/Pacific Islander)	Male	8170	T1	N0	0	No radiation and/or cancer-directed surgery	Not recommended	No/Unknown	100	999	No	No	No	No	Dead (attributable to this cancer dx)	6	Dead	One primary only	40	5430265
Other (American Indian/AK Native, Asian/Pacific Islander)	Male	8170	T1	N0	16	No radiation and/or cancer-directed surgery	Surgery performed	No/Unknown	13	998	No	No	No	No	Alive or dead of other cause	45	Alive	One primary only	53	5430320
White	Male	8170	T1	N0	51	No radiation and/or cancer-directed surgery	Surgery performed	No/Unknown	85	20	No	No	No	No	Alive or dead of other cause	48	Alive	One primary only	37	5430355
Other (American Indian/AK Native, Asian/Pacific Islander)	Male	8170	T1	N0	0	No radiation and/or cancer-directed surgery	Not recommended	Yes	30	20	No	No	No	No	Alive or dead of other cause	50	Alive	1st of 2 or more primaries	69	5431370
Other (American Indian/AK Native, Asian/Pacific Islander)	Female	8170	T1	N0	61	No radiation and/or cancer-directed surgery	Surgery performed	No/Unknown	21	10	No	No	No	No	Alive or dead of other cause	52	Alive	1st of 2 or more primaries	55	5431405
White	Male	8170	T1	N0	0	No radiation and/or cancer-directed surgery	Not recommended	Yes	45	20	No	No	No	No	Alive or dead of other cause	16	Dead	One primary only	61	5431537
Black	Male	8170	T3b	N0	0	No radiation and/or cancer-directed surgery	Not recommended	No/Unknown	45	10	No	No	No	No	Dead (attributable to this cancer dx)	6	Dead	One primary only	57	5431680
Other (American Indian/AK Native, Asian/Pacific Islander)	Female	8170	T1	N0	0	No radiation and/or cancer-directed surgery	Not recommended	Yes	20	10	No	No	No	No	Alive or dead of other cause	49	Alive	One primary only	62	5431681
Other (American Indian/AK Native, Asian/Pacific Islander)	Female	8170	T2	N0	16	No radiation and/or cancer-directed surgery	Surgery performed	No/Unknown	21	10	No	No	No	No	Dead (attributable to this cancer dx)	42	Dead	One primary only	76	5431854
White	Male	8170	T3a	N0	0	No radiation and/or cancer-directed surgery	Not recommended	Yes	132	10	No	No	No	No	Dead (attributable to this cancer dx)	5	Dead	One primary only	82	5431861
Other (American Indian/AK Native, Asian/Pacific Islander)	Male	8170	T2	N0	0	No radiation and/or cancer-directed surgery	Not recommended	No/Unknown	28	10	No	No	No	No	Dead (attributable to this cancer dx)	31	Dead	One primary only	77	5431874
Other (American Indian/AK Native, Asian/Pacific Islander)	Male	8170	T1	N0	16	No radiation and/or cancer-directed surgery	Surgery performed	No/Unknown	25	10	No	No	No	No	Alive or dead of other cause	45	Alive	One primary only	85	5431875
Other (American Indian/AK Native, Asian/Pacific Islander)	Male	8170	TX	N0	0	No radiation and/or cancer-directed surgery	Recommended but not performed, patient refused	No/Unknown	999	10	No	No	No	No	Dead (attributable to this cancer dx)	21	Dead	One primary only	80	5431904
White	Male	8170	T1	N0	0	No radiation and/or cancer-directed surgery	Not recommended	Yes	16	10	No	No	No	No	Alive or dead of other cause	44	Alive	1st of 2 or more primaries	59	5432163
Other (American Indian/AK Native, Asian/Pacific Islander)	Male	8170	T3a	NX	0	No radiation and/or cancer-directed surgery	Not recommended	No/Unknown	100	10	No	No	No	Yes	Dead (attributable to this cancer dx)	3	Dead	One primary only	49	5432178
White	Female	8170	T1	N0	0	No radiation and/or cancer-directed surgery	Not recommended	Yes	19	20	No	No	No	No	Dead (attributable to this cancer dx)	5	Dead	One primary only	72	5432179
White	Male	8172	T1	N0	23	No radiation and/or cancer-directed surgery	Surgery performed	No/Unknown	32	20	No	No	No	No	Alive or dead of other cause	57	Alive	One primary only	65	5432231
White	Male	8170	T3a	NX	0	No radiation and/or cancer-directed surgery	Not recommended	No/Unknown	250	10	No	No	No	No	Dead (attributable to this cancer dx)	2	Dead	One primary only	84	5432358
White	Male	8170	T2	N0	0	No radiation and/or cancer-directed surgery	Recommended but not performed, unknown reason	No/Unknown	50	20	No	No	No	No	Alive or dead of other cause	45	Alive	One primary only	64	5432544
Other (American Indian/AK Native, Asian/Pacific Islander)	Female	8170	T1	N0	0	No radiation and/or cancer-directed surgery	Not recommended	No/Unknown	76	20	No	No	No	No	Dead (attributable to this cancer dx)	6	Dead	One primary only	81	5432825
White	Female	8170	TX	N0	0	No radiation and/or cancer-directed surgery	Not recommended	No/Unknown	999	999	Yes	No	No	Yes	Dead (attributable to this cancer dx)	0	Dead	One primary only	74	5432911
Other (American Indian/AK Native, Asian/Pacific Islander)	Male	8170	T4	N0	0	No radiation and/or cancer-directed surgery	Not recommended	No/Unknown	999	997	No	No	No	Yes	Dead (attributable to this cancer dx)	0	Dead	One primary only	50	5433160
Other (American Indian/AK Native, Asian/Pacific Islander)	Female	8170	T1	N0	21	No radiation and/or cancer-directed surgery	Surgery performed	No/Unknown	33	998	No	No	No	No	Alive or dead of other cause	48	Alive	One primary only	81	5433365
White	Male	8170	T1	N0	24	No radiation and/or cancer-directed surgery	Surgery performed	No/Unknown	25	20	No	No	No	No	Alive or dead of other cause	24	Dead	1st of 2 or more primaries	73	5433545
White	Female	8170	T1	N0	20	No radiation and/or cancer-directed surgery	Surgery performed	No/Unknown	29	998	No	No	No	No	Alive or dead of other cause	45	Alive	One primary only	52	5433924
White	Male	8170	T3a	N0	0	No radiation and/or cancer-directed surgery	Not recommended	Yes	124	20	Yes	No	No	No	Dead (attributable to this cancer dx)	12	Dead	One primary only	66	5434002
White	Male	8170	T3a	N0	0	No radiation and/or cancer-directed surgery	Not recommended	Yes	52	10	No	No	No	No	Dead (attributable to this cancer dx)	18	Dead	One primary only	77	5434135
White	Male	8170	T2	N0	0	No radiation and/or cancer-directed surgery	Not recommended	Yes	999	20	No	No	No	No	Dead (attributable to this cancer dx)	10	Dead	One primary only	58	5434141
Other (American Indian/AK Native, Asian/Pacific Islander)	Male	8170	T3a	N1	0	No radiation and/or cancer-directed surgery	Not recommended	No/Unknown	78	997	No	No	No	No	Dead (attributable to this cancer dx)	3	Dead	One primary only	71	5434217
Other (American Indian/AK Native, Asian/Pacific Islander)	Male	8170	T1	N0	0	No radiation and/or cancer-directed surgery	Not recommended	Yes	160	20	No	No	No	No	Dead (attributable to this cancer dx)	16	Dead	One primary only	81	5434827
White	Male	8170	T1	N0	15	No radiation and/or cancer-directed surgery	Surgery performed	Yes	28	20	No	No	No	No	Alive or dead of other cause	48	Alive	One primary only	54	5434853
White	Female	8170	T2	N0	0	No radiation and/or cancer-directed surgery	Not recommended	Yes	44	20	No	No	No	No	Dead (attributable to this cancer dx)	43	Dead	One primary only	71	5434856
White	Male	8170	TX	N0	0	No radiation and/or cancer-directed surgery	Not recommended	No/Unknown	999	10	Yes	No	No	No	Dead (attributable to this cancer dx)	7	Dead	One primary only	57	5434858
White	Male	8170	T1	N0	0	No radiation and/or cancer-directed surgery	Not recommended	Yes	68	10	No	No	No	No	Alive or dead of other cause	22	Dead	One primary only	63	5434867
White	Male	8170	T1	N0	16	No radiation and/or cancer-directed surgery	Surgery performed	No/Unknown	24	10	No	No	No	No	Dead (attributable to this cancer dx)	27	Dead	One primary only	60	5435009
White	Male	8170	T3a	N0	0	No radiation and/or cancer-directed surgery	Not recommended	Yes	136	10	No	No	No	No	Dead (attributable to this cancer dx)	9	Dead	One primary only	60	5435012
White	Male	8170	T3a	N0	0	No radiation and/or cancer-directed surgery	Not recommended	Yes	73	10	No	No	No	No	Dead (attributable to this cancer dx)	6	Dead	One primary only	58	5435016
Other (American Indian/AK Native, Asian/Pacific Islander)	Male	8170	T2	N0	0	No radiation and/or cancer-directed surgery	Not recommended	Yes	46	10	No	No	No	No	Dead (attributable to this cancer dx)	16	Dead	One primary only	47	5435174
Other (American Indian/AK Native, Asian/Pacific Islander)	Male	8170	T1	N0	61	No radiation and/or cancer-directed surgery	Surgery performed	Yes	24	10	No	No	No	No	Alive or dead of other cause	45	Alive	One primary only	57	5435177
Other (American Indian/AK Native, Asian/Pacific Islander)	Male	8170	T1	N0	0	No radiation and/or cancer-directed surgery	Not recommended	No/Unknown	110	10	No	No	No	Yes	Alive or dead of other cause	0	Alive	One primary only	78	5435380
White	Female	8170	T1	N0	61	No radiation and/or cancer-directed surgery	Surgery performed	No/Unknown	25	10	No	No	No	No	Alive or dead of other cause	45	Alive	One primary only	58	5435734
White	Male	8170	T2	N0	0	No radiation and/or cancer-directed surgery	Not recommended	Yes	28	20	No	No	No	No	Dead (attributable to this cancer dx)	8	Dead	One primary only	51	5436848
White	Male	8170	T1	N0	0	No radiation and/or cancer-directed surgery	Not recommended	Yes	27	10	No	No	No	No	Dead (attributable to this cancer dx)	20	Dead	One primary only	61	5436946
Black	Female	8170	T1	N0	0	No radiation and/or cancer-directed surgery	Not recommended	Yes	40	10	No	No	No	No	Dead (attributable to this cancer dx)	19	Dead	One primary only	58	5437167
White	Male	8170	T1	N0	61	No radiation and/or cancer-directed surgery	Surgery performed	No/Unknown	16	20	No	No	No	No	Alive or dead of other cause	46	Alive	One primary only	62	5437309
White	Male	8170	T1	N0	16	No radiation and/or cancer-directed surgery	Surgery performed	No/Unknown	30	10	No	No	No	No	Dead (attributable to this cancer dx)	30	Dead	One primary only	74	5437484
Other (American Indian/AK Native, Asian/Pacific Islander)	Male	8170	T3a	N1	10	No radiation and/or cancer-directed surgery	Surgery performed	Yes	70	10	No	No	No	No	Dead (attributable to this cancer dx)	17	Dead	One primary only	56	5437585
Other (American Indian/AK Native, Asian/Pacific Islander)	Male	8170	T3a	N0	0	No radiation and/or cancer-directed surgery	Not recommended	Yes	123	10	No	No	No	No	Dead (attributable to this cancer dx)	7	Dead	One primary only	52	5437590
White	Male	8170	T4	N0	0	No radiation and/or cancer-directed surgery	Not recommended	Yes	160	10	No	No	No	No	Alive or dead of other cause	42	Alive	One primary only	65	5437600
White	Male	8170	T4	N0	0	No radiation and/or cancer-directed surgery	Not recommended	No/Unknown	200	997	No	No	No	No	Dead (attributable to this cancer dx)	0	Dead	One primary only	54	5437606
Other (American Indian/AK Native, Asian/Pacific Islander)	Male	8170	TX	N0	0	No radiation and/or cancer-directed surgery	Not recommended	No/Unknown	999	997	No	No	No	No	Dead (attributable to this cancer dx)	1	Dead	One primary only	84	5437667
White	Male	8170	T1	N0	0	No radiation and/or cancer-directed surgery	Not recommended	No/Unknown	53	10	No	No	No	No	Dead (attributable to this cancer dx)	0	Dead	One primary only	61	5438104
White	Male	8170	TX	NX	0	No radiation and/or cancer-directed surgery	Not recommended	No/Unknown	999	10	No	No	No	No	Dead (attributable to this cancer dx)	0	Dead	One primary only	70	5438118
Other (American Indian/AK Native, Asian/Pacific Islander)	Male	8170	T3a	N0	0	No radiation and/or cancer-directed surgery	Not recommended	No/Unknown	65	10	No	No	No	No	Dead (attributable to this cancer dx)	3	Dead	One primary only	47	5438165
White	Male	8170	T2	N0	0	No radiation and/or cancer-directed surgery	Not recommended	Yes	47	10	No	No	No	No	Dead (attributable to this cancer dx)	10	Dead	One primary only	55	5438191
Other (American Indian/AK Native, Asian/Pacific Islander)	Male	8170	T2	N0	0	No radiation and/or cancer-directed surgery	Not recommended	No/Unknown	45	10	No	No	No	No	Dead (attributable to this cancer dx)	0	Dead	One primary only	87	5438359
White	Male	8172	T1	N0	0	No radiation and/or cancer-directed surgery	Not recommended	Yes	38	20	No	No	No	No	Dead (attributable to this cancer dx)	11	Dead	One primary only	51	5438394
White	Male	8170	T3a	N0	0	No radiation and/or cancer-directed surgery	Not recommended	Yes	56	10	No	No	No	No	Dead (attributable to this cancer dx)	22	Dead	One primary only	62	5438439
White	Male	8170	T2	N0	0	No radiation and/or cancer-directed surgery	Not recommended	Yes	28	10	No	No	No	No	Dead (attributable to this cancer dx)	0	Dead	One primary only	60	5438860
Other (American Indian/AK Native, Asian/Pacific Islander)	Male	8170	T1	N0	0	No radiation and/or cancer-directed surgery	Not recommended	Yes	40	10	No	No	No	No	Dead (attributable to this cancer dx)	11	Dead	One primary only	56	5438862
White	Male	8170	TX	N0	0	No radiation and/or cancer-directed surgery	Not recommended	No/Unknown	999	10	No	No	No	No	Dead (attributable to this cancer dx)	0	Dead	One primary only	65	5438954
Black	Male	8170	TX	N0	0	No radiation and/or cancer-directed surgery	Not recommended	Yes	47	10	No	No	No	No	Alive or dead of other cause	11	Dead	One primary only	66	5438965
Other (American Indian/AK Native, Asian/Pacific Islander)	Male	8170	T4	N1	0	No radiation and/or cancer-directed surgery	Not recommended	Yes	115	10	No	No	No	No	Dead (attributable to this cancer dx)	4	Dead	One primary only	56	5439011
White	Male	8170	T1	N0	0	No radiation and/or cancer-directed surgery	Not recommended	No/Unknown	22	20	No	No	No	No	Alive or dead of other cause	0	Alive	One primary only	48	5439062
Other (American Indian/AK Native, Asian/Pacific Islander)	Female	8170	TX	NX	0	No radiation and/or cancer-directed surgery	Not recommended	No/Unknown	999	999	No	No	No	No	Dead (attributable to this cancer dx)	2	Dead	One primary only	72	5439318
Other (American Indian/AK Native, Asian/Pacific Islander)	Male	8170	T3a	N0	0	No radiation and/or cancer-directed surgery	Not recommended	Yes	116	10	No	No	No	No	Dead (attributable to this cancer dx)	1	Dead	One primary only	73	5439496
Other (American Indian/AK Native, Asian/Pacific Islander)	Male	8170	T1	N0	23	No radiation and/or cancer-directed surgery	Surgery performed	No/Unknown	24	20	No	No	No	No	Alive or dead of other cause	49	Alive	One primary only	59	5439504
Black	Male	8170	T1	N0	0	No radiation and/or cancer-directed surgery	Not recommended	Yes	60	10	No	No	No	No	Dead (attributable to this cancer dx)	18	Dead	One primary only	58	5439522
Other (American Indian/AK Native, Asian/Pacific Islander)	Male	8170	T3b	N0	0	No radiation and/or cancer-directed surgery	Not recommended	No/Unknown	180	998	No	No	No	Yes	Dead (attributable to this cancer dx)	1	Dead	One primary only	51	5439556
White	Male	8170	T1	N0	0	No radiation and/or cancer-directed surgery	Not recommended	No/Unknown	999	999	No	No	No	No	Dead (attributable to this cancer dx)	0	Dead	One primary only	50	5439719
Other (American Indian/AK Native, Asian/Pacific Islander)	Male	8170	T1	N0	0	No radiation and/or cancer-directed surgery	Not recommended	Yes	67	997	No	No	No	No	Dead (attributable to this cancer dx)	9	Dead	One primary only	73	6125139
White	Male	8170	T2	N0	0	No radiation and/or cancer-directed surgery	Not recommended	Yes	25	20	No	No	No	No	Alive or dead of other cause	44	Alive	One primary only	56	6125143
Other (American Indian/AK Native, Asian/Pacific Islander)	Male	8170	T1	N0	0	No radiation and/or cancer-directed surgery	Not recommended	Yes	70	10	No	No	No	No	Dead (attributable to this cancer dx)	8	Dead	One primary only	67	6125147
White	Male	8170	T2	N0	0	No radiation and/or cancer-directed surgery	Not recommended	Yes	23	20	No	No	No	No	Dead (attributable to this cancer dx)	8	Dead	One primary only	67	6125150
White	Female	8170	T1	N0	16	No radiation and/or cancer-directed surgery	Surgery performed	Yes	21	999	No	No	No	No	Alive or dead of other cause	45	Alive	One primary only	63	6125560
White	Male	8170	TX	N0	0	No radiation and/or cancer-directed surgery	Not recommended	No/Unknown	999	10	No	No	No	No	Dead (attributable to this cancer dx)	3	Dead	One primary only	65	6125639
Other (American Indian/AK Native, Asian/Pacific Islander)	Female	8170	T4	NX	0	No radiation and/or cancer-directed surgery	Not recommended	Yes	70	10	No	No	No	No	Dead (attributable to this cancer dx)	2	Dead	One primary only	69	6125744
Other (American Indian/AK Native, Asian/Pacific Islander)	Male	8170	T2	N0	16	No radiation and/or cancer-directed surgery	Surgery performed	Yes	30	10	No	No	No	No	Alive or dead of other cause	50	Alive	One primary only	68	6125856
White	Male	8170	T3a	N0	0	No radiation and/or cancer-directed surgery	Not recommended	Yes	74	10	No	No	No	No	Dead (attributable to this cancer dx)	4	Dead	One primary only	61	6126036
Black	Male	8170	T1	N0	0	No radiation and/or cancer-directed surgery	Not recommended	No/Unknown	78	10	No	No	No	No	Dead (attributable to this cancer dx)	5	Dead	One primary only	57	6126183
White	Male	8170	T1	N0	61	No radiation and/or cancer-directed surgery	Surgery performed	Yes	60	10	No	No	No	No	Alive or dead of other cause	51	Alive	One primary only	61	6126474
White	Male	8170	T3a	N0	0	No radiation and/or cancer-directed surgery	Not recommended	Yes	65	10	No	No	No	No	Dead (attributable to this cancer dx)	10	Dead	One primary only	64	6126572
White	Male	8170	TX	NX	0	No radiation and/or cancer-directed surgery	Not recommended	Yes	16	20	No	No	No	No	Alive or dead of other cause	4	Dead	One primary only	68	6126652
Other (American Indian/AK Native, Asian/Pacific Islander)	Male	8170	TX	NX	0	No radiation and/or cancer-directed surgery	Not recommended	No/Unknown	103	999	No	No	No	Yes	Dead (attributable to this cancer dx)	3	Dead	One primary only	52	6126683
Black	Male	8170	T2	N0	0	No radiation and/or cancer-directed surgery	Not recommended	No/Unknown	34	10	No	No	No	No	Alive or dead of other cause	27	Dead	One primary only	63	6126728
White	Male	8170	TX	NX	0	No radiation and/or cancer-directed surgery	Not recommended	No/Unknown	999	997	Yes	No	No	No	Alive or dead of other cause	0	Dead	One primary only	61	6126927
Other (American Indian/AK Native, Asian/Pacific Islander)	Male	8170	T2	N0	0	No radiation and/or cancer-directed surgery	Not recommended	Yes	17	20	No	No	No	No	Alive or dead of other cause	46	Alive	One primary only	53	6126994
Black	Male	8170	T3b	N0	0	No radiation and/or cancer-directed surgery	Not recommended	Yes	108	997	No	No	No	Yes	Dead (attributable to this cancer dx)	4	Dead	One primary only	54	6127070
White	Male	8170	T3a	N0	36	No radiation and/or cancer-directed surgery	Surgery performed	Yes	143	10	No	No	No	No	Dead (attributable to this cancer dx)	8	Dead	One primary only	75	6127111
Other (American Indian/AK Native, Asian/Pacific Islander)	Female	8170	T3a	N0	0	No radiation and/or cancer-directed surgery	Not performed, patient died prior to recommended surgery	No/Unknown	80	999	No	No	No	No	Dead (attributable to this cancer dx)	0	Dead	One primary only	63	6127159
White	Male	8170	T1	N0	0	No radiation and/or cancer-directed surgery	Not recommended	No/Unknown	999	10	No	No	No	No	Dead (attributable to this cancer dx)	23	Dead	One primary only	63	6127178
Other (American Indian/AK Native, Asian/Pacific Islander)	Male	8170	T2	N0	0	No radiation and/or cancer-directed surgery	Not recommended	Yes	49	20	No	No	No	No	Dead (attributable to this cancer dx)	11	Dead	One primary only	55	6127443
Other (American Indian/AK Native, Asian/Pacific Islander)	Male	8175	T1	N0	36	No radiation and/or cancer-directed surgery	Surgery performed	No/Unknown	100	999	No	No	No	No	Dead (attributable to this cancer dx)	14	Dead	One primary only	42	6127512
White	Male	8170	T1	N0	0	No radiation and/or cancer-directed surgery	Not recommended	Yes	999	10	No	No	No	No	Dead (attributable to this cancer dx)	10	Dead	One primary only	66	6127549
White	Male	8170	T3b	N0	0	No radiation and/or cancer-directed surgery	Not recommended	No/Unknown	999	10	No	No	No	No	Alive or dead of other cause	0	Dead	One primary only	58	6127584
White	Male	8170	T2	N1	0	No radiation and/or cancer-directed surgery	Not recommended	No/Unknown	14	10	Yes	No	No	Yes	Dead (attributable to this cancer dx)	2	Dead	One primary only	63	6127626
Other (American Indian/AK Native, Asian/Pacific Islander)	Male	8170	T3a	N0	0	No radiation and/or cancer-directed surgery	Not recommended	Yes	120	10	No	No	No	No	Dead (attributable to this cancer dx)	16	Dead	One primary only	38	6127656
Other (American Indian/AK Native, Asian/Pacific Islander)	Male	8170	T1	N0	0	No radiation and/or cancer-directed surgery	Not recommended	No/Unknown	35	10	No	No	No	No	Alive or dead of other cause	14	Dead	One primary only	54	6127684
Other (American Indian/AK Native, Asian/Pacific Islander)	Male	8170	T1	N0	16	No radiation and/or cancer-directed surgery	Surgery performed	No/Unknown	14	10	No	No	No	No	Alive or dead of other cause	42	Alive	One primary only	56	6127688
White	Male	8170	T1	N0	0	No radiation and/or cancer-directed surgery	Not recommended	No/Unknown	15	20	No	No	No	No	Dead (attributable to this cancer dx)	2	Dead	One primary only	59	6127691
Black	Male	8170	T1	N0	0	No radiation and/or cancer-directed surgery	Not recommended	No/Unknown	24	10	No	No	No	No	Dead (attributable to this cancer dx)	18	Dead	One primary only	60	6127692
Other (American Indian/AK Native, Asian/Pacific Islander)	Female	8170	T1	N0	0	No radiation and/or cancer-directed surgery	Not recommended	No/Unknown	23	998	No	No	No	No	Alive or dead of other cause	42	Alive	One primary only	57	6127695
White	Male	8170	T3a	N0	0	No radiation and/or cancer-directed surgery	Not recommended	Yes	51	10	No	No	No	No	Alive or dead of other cause	9	Dead	One primary only	59	6127696
White	Male	8170	T1	N0	0	No radiation and/or cancer-directed surgery	Not recommended	Yes	95	997	No	No	No	No	Dead (attributable to this cancer dx)	6	Dead	One primary only	63	6127706
Other (American Indian/AK Native, Asian/Pacific Islander)	Male	8170	T1	N0	0	No radiation and/or cancer-directed surgery	Not recommended	Yes	17	999	No	No	No	No	Alive or dead of other cause	48	Alive	One primary only	55	6127868
Other (American Indian/AK Native, Asian/Pacific Islander)	Female	8170	T1	N0	36	No radiation and/or cancer-directed surgery	Surgery performed	No/Unknown	150	997	No	No	No	No	Alive or dead of other cause	44	Alive	One primary only	65	6127959
Other (American Indian/AK Native, Asian/Pacific Islander)	Male	8170	T3a	N0	0	No radiation and/or cancer-directed surgery	Not recommended	No/Unknown	121	10	No	No	No	No	Dead (attributable to this cancer dx)	1	Dead	One primary only	61	6128023
White	Male	8170	TX	N0	0	No radiation and/or cancer-directed surgery	Not recommended	Yes	999	10	No	No	No	No	Dead (attributable to this cancer dx)	2	Dead	One primary only	83	6128029
White	Male	8170	T3b	N0	16	No radiation and/or cancer-directed surgery	Surgery performed	No/Unknown	37	10	No	No	No	No	Dead (attributable to this cancer dx)	23	Dead	One primary only	64	6128090
White	Female	8170	T3a	N0	0	No radiation and/or cancer-directed surgery	Not recommended	No/Unknown	55	10	No	No	No	No	Dead (attributable to this cancer dx)	5	Dead	One primary only	64	6128113
White	Male	8170	T3b	N0	0	No radiation and/or cancer-directed surgery	Not recommended	Yes	158	10	No	No	No	No	Dead (attributable to this cancer dx)	5	Dead	One primary only	60	6128175
Other (American Indian/AK Native, Asian/Pacific Islander)	Male	8170	T2	N0	23	No radiation and/or cancer-directed surgery	Surgery performed	Yes	45	10	No	No	No	No	Alive or dead of other cause	43	Alive	One primary only	63	6128189
Black	Female	8170	TX	N0	0	No radiation and/or cancer-directed surgery	Not recommended	No/Unknown	999	20	No	No	No	No	Alive or dead of other cause	5	Dead	One primary only	60	6128206
Other (American Indian/AK Native, Asian/Pacific Islander)	Male	8170	T2	N0	61	No radiation and/or cancer-directed surgery	Surgery performed	Yes	36	10	No	No	No	No	Alive or dead of other cause	45	Alive	One primary only	59	6128542
Other (American Indian/AK Native, Asian/Pacific Islander)	Male	8170	T1	N0	23	No radiation and/or cancer-directed surgery	Surgery performed	No/Unknown	18	997	No	No	No	No	Alive or dead of other cause	44	Alive	One primary only	68	6128819
Black	Male	8170	T1	N0	0	No radiation and/or cancer-directed surgery	Not recommended	Yes	84	10	No	No	No	No	Dead (attributable to this cancer dx)	10	Dead	One primary only	63	6128963
White	Male	8170	T2	N0	0	No radiation and/or cancer-directed surgery	Not recommended	No/Unknown	23	20	Yes	No	No	No	Dead (attributable to this cancer dx)	0	Dead	One primary only	70	6129058
White	Male	8170	T2	N0	0	No radiation and/or cancer-directed surgery	Not recommended	Yes	42	10	No	No	No	No	Alive or dead of other cause	13	Dead	One primary only	44	6129428
White	Female	8170	T1	N0	0	No radiation and/or cancer-directed surgery	Not recommended	Yes	33	10	No	No	No	No	Alive or dead of other cause	45	Alive	One primary only	61	6129429
White	Male	8170	T1	N0	22	No radiation and/or cancer-directed surgery	Surgery performed	No/Unknown	39	20	No	No	No	No	Alive or dead of other cause	42	Alive	One primary only	64	6129458
Black	Male	8170	T1	N0	37	No radiation and/or cancer-directed surgery	Surgery performed	No/Unknown	32	10	No	No	No	No	Dead (attributable to this cancer dx)	4	Dead	One primary only	57	6129462
White	Female	8170	T1	N0	0	No radiation and/or cancer-directed surgery	Not recommended	Yes	35	10	No	No	No	No	Dead (attributable to this cancer dx)	3	Dead	One primary only	68	6129551
Other (American Indian/AK Native, Asian/Pacific Islander)	Female	8170	T1	N0	16	No radiation and/or cancer-directed surgery	Surgery performed	No/Unknown	32	20	No	No	No	No	Alive or dead of other cause	53	Alive	One primary only	61	6130051
Other (American Indian/AK Native, Asian/Pacific Islander)	Male	8170	T1	N0	16	No radiation and/or cancer-directed surgery	Surgery performed	No/Unknown	121	10	No	No	No	No	Dead (attributable to this cancer dx)	25	Dead	One primary only	64	6130090
Other (American Indian/AK Native, Asian/Pacific Islander)	Male	8170	T1	N0	16	No radiation and/or cancer-directed surgery	Surgery performed	No/Unknown	18	20	No	No	No	No	Alive or dead of other cause	51	Alive	1st of 2 or more primaries	56	6130092
Other (American Indian/AK Native, Asian/Pacific Islander)	Male	8170	T1	N0	0	No radiation and/or cancer-directed surgery	Not recommended	No/Unknown	49	998	No	No	No	No	Dead (attributable to this cancer dx)	0	Dead	One primary only	62	6130095
Black	Male	8170	T3b	N1	0	No radiation and/or cancer-directed surgery	Not recommended	No/Unknown	73	10	No	No	No	No	Dead (attributable to this cancer dx)	19	Dead	One primary only	55	6130096
White	Male	8170	T1	N0	16	No radiation and/or cancer-directed surgery	Surgery performed	No/Unknown	30	10	No	No	No	No	Dead (attributable to this cancer dx)	15	Dead	One primary only	51	6130137
White	Male	8170	T1	N0	16	No radiation and/or cancer-directed surgery	Surgery performed	No/Unknown	26	20	No	No	No	No	Dead (attributable to this cancer dx)	21	Dead	One primary only	59	6130173
White	Male	8170	T1	N1	0	No radiation and/or cancer-directed surgery	Not recommended	No/Unknown	32	998	No	No	No	No	Alive or dead of other cause	5	Dead	One primary only	54	6130176
White	Male	8170	T2	N0	10	No radiation and/or cancer-directed surgery	Surgery performed	No/Unknown	36	10	No	No	No	No	Alive or dead of other cause	4	Dead	One primary only	63	6130179
White	Male	8170	T1	N0	0	No radiation and/or cancer-directed surgery	Not recommended	No/Unknown	20	20	No	No	No	No	Alive or dead of other cause	44	Alive	One primary only	61	6130181
White	Male	8170	T1	N0	0	No radiation and/or cancer-directed surgery	Not recommended	No/Unknown	15	10	No	No	No	No	Dead (attributable to this cancer dx)	17	Dead	One primary only	65	6130183
White	Male	8170	T2	N0	0	No radiation and/or cancer-directed surgery	Recommended but not performed, patient refused	No/Unknown	21	20	No	No	No	No	Alive or dead of other cause	5	Dead	One primary only	53	6130212
Black	Female	8170	T2	N0	0	No radiation and/or cancer-directed surgery	Recommended, unknown if performed	Yes	30	997	No	No	No	No	Dead (attributable to this cancer dx)	10	Dead	One primary only	51	6130255
White	Male	8170	T1	N0	0	No radiation and/or cancer-directed surgery	Not recommended	Yes	55	20	No	No	No	No	Dead (attributable to this cancer dx)	36	Dead	One primary only	88	6130319
White	Male	8170	T1	N0	0	No radiation and/or cancer-directed surgery	Not recommended	No/Unknown	31	20	No	No	No	No	Dead (attributable to this cancer dx)	3	Dead	One primary only	70	6130364
Other (American Indian/AK Native, Asian/Pacific Islander)	Male	8170	T2	N0	0	No radiation and/or cancer-directed surgery	Not recommended	No/Unknown	22	10	Yes	No	No	No	Dead (attributable to this cancer dx)	0	Dead	One primary only	64	6130466
White	Male	8170	T1	NX	0	No radiation and/or cancer-directed surgery	Not recommended	Yes	73	10	No	No	Yes	Yes	Dead (attributable to this cancer dx)	6	Dead	One primary only	68	6130519
Other (American Indian/AK Native, Asian/Pacific Islander)	Male	8170	T2	N0	0	No radiation and/or cancer-directed surgery	Not recommended	Yes	20	20	No	No	No	No	Alive or dead of other cause	23	Dead	1st of 2 or more primaries	68	6130587
Black	Male	8170	T1	N0	23	No radiation and/or cancer-directed surgery	Surgery performed	No/Unknown	49	997	No	No	No	No	Alive or dead of other cause	42	Alive	One primary only	64	6130727
Other (American Indian/AK Native, Asian/Pacific Islander)	Male	8170	T3a	N0	0	No radiation and/or cancer-directed surgery	Not recommended	No/Unknown	180	10	No	No	No	Yes	Dead (attributable to this cancer dx)	0	Dead	One primary only	55	6130877
Black	Male	8170	T2	N0	23	No radiation and/or cancer-directed surgery	Surgery performed	No/Unknown	50	10	No	No	No	No	Dead (attributable to this cancer dx)	7	Dead	One primary only	71	6130965
Black	Male	8170	T1	N0	0	No radiation and/or cancer-directed surgery	Not recommended	Yes	52	999	No	No	No	No	Alive or dead of other cause	24	Alive	One primary only	49	6131361
Other (American Indian/AK Native, Asian/Pacific Islander)	Male	8170	T3a	N0	0	No radiation and/or cancer-directed surgery	Not recommended	Yes	55	997	No	No	No	No	Alive or dead of other cause	41	Alive	One primary only	72	6131389
Other (American Indian/AK Native, Asian/Pacific Islander)	Male	8170	T2	N0	0	No radiation and/or cancer-directed surgery	Not recommended	No/Unknown	19	10	No	No	No	No	Dead (attributable to this cancer dx)	1	Dead	One primary only	72	6131620
Other (American Indian/AK Native, Asian/Pacific Islander)	Male	8170	T1	N0	0	No radiation and/or cancer-directed surgery	Not recommended	Yes	35	10	No	No	No	No	Alive or dead of other cause	44	Alive	One primary only	64	6131794
White	Male	8170	T1	N0	16	No radiation and/or cancer-directed surgery	Surgery performed	No/Unknown	29	997	No	No	No	No	Alive or dead of other cause	42	Alive	One primary only	59	6132097
White	Male	8170	T1	N0	0	No radiation and/or cancer-directed surgery	Not recommended	Yes	75	20	No	No	No	No	Dead (attributable to this cancer dx)	6	Dead	One primary only	68	6132291
Black	Male	8170	T3b	N0	0	No radiation and/or cancer-directed surgery	Not recommended	Yes	116	20	No	No	No	No	Alive or dead of other cause	2	Dead	One primary only	50	6132409
Black	Female	8170	T2	N0	0	No radiation and/or cancer-directed surgery	Not recommended	No/Unknown	26	10	No	No	No	No	Alive or dead of other cause	54	Alive	1st of 2 or more primaries	57	6132462
Other (American Indian/AK Native, Asian/Pacific Islander)	Male	8170	T1	N0	16	No radiation and/or cancer-directed surgery	Surgery performed	No/Unknown	27	997	No	No	No	No	Dead (attributable to this cancer dx)	4	Dead	One primary only	62	6132723
White	Male	8170	T3b	N1	0	No radiation and/or cancer-directed surgery	Not recommended	Yes	93	10	No	No	No	No	Dead (attributable to this cancer dx)	12	Dead	One primary only	59	6132753
White	Male	8170	T3a	N0	0	No radiation and/or cancer-directed surgery	Not recommended	Yes	140	10	No	No	No	No	Dead (attributable to this cancer dx)	12	Dead	One primary only	52	6132756
Black	Male	8170	T1	N0	16	No radiation and/or cancer-directed surgery	Surgery performed	Yes	22	20	No	No	No	No	Alive or dead of other cause	3	Dead	One primary only	64	6132828
White	Male	8172	T2	N0	0	No radiation and/or cancer-directed surgery	Not recommended	No/Unknown	26	10	No	No	No	No	Alive or dead of other cause	20	Dead	One primary only	64	6132972
Other (American Indian/AK Native, Asian/Pacific Islander)	Female	8170	T3b	N1	0	No radiation and/or cancer-directed surgery	Not recommended	Yes	28	10	No	No	No	No	Alive or dead of other cause	5	Dead	One primary only	65	6133131
Other (American Indian/AK Native, Asian/Pacific Islander)	Male	8170	T2	N0	36	No radiation and/or cancer-directed surgery	Surgery performed	No/Unknown	65	20	No	No	No	No	Alive or dead of other cause	43	Alive	One primary only	62	6133211
White	Male	8170	TX	NX	0	No radiation and/or cancer-directed surgery	Not recommended	No/Unknown	999	20	Yes	No	No	Yes	Dead (attributable to this cancer dx)	1	Dead	One primary only	73	6133645
Other (American Indian/AK Native, Asian/Pacific Islander)	Male	8170	TX	N1	0	No radiation and/or cancer-directed surgery	Not recommended	No/Unknown	999	10	No	No	No	Yes	Dead (attributable to this cancer dx)	0	Dead	One primary only	51	6133738
White	Female	8170	T4	N0	30	No radiation and/or cancer-directed surgery	Surgery performed	No/Unknown	100	20	No	No	No	No	Alive or dead of other cause	39	Alive	One primary only	83	6133819
Other (American Indian/AK Native, Asian/Pacific Islander)	Male	8170	T1	N0	0	No radiation and/or cancer-directed surgery	Not recommended	No/Unknown	100	10	Yes	No	No	No	Dead (attributable to this cancer dx)	2	Dead	One primary only	51	6133959
Other (American Indian/AK Native, Asian/Pacific Islander)	Male	8170	T1	N0	20	No radiation and/or cancer-directed surgery	Surgery performed	No/Unknown	35	10	No	No	No	No	Alive or dead of other cause	29	Alive	One primary only	45	6133984
Black	Female	8170	TX	N1	0	No radiation and/or cancer-directed surgery	Not recommended	Yes	999	10	No	No	No	No	Dead (attributable to this cancer dx)	1	Dead	One primary only	78	6134490
White	Male	8170	T3a	N0	0	No radiation and/or cancer-directed surgery	Not recommended	No/Unknown	60	10	No	No	No	No	Dead (attributable to this cancer dx)	3	Dead	One primary only	54	6134521
Black	Male	8170	T3b	N0	0	No radiation and/or cancer-directed surgery	Not recommended	Yes	92	10	No	No	No	Yes	Alive or dead of other cause	1	Dead	One primary only	45	6134527
Other (American Indian/AK Native, Asian/Pacific Islander)	Male	8170	T1	N0	16	No radiation and/or cancer-directed surgery	Surgery performed	No/Unknown	21	20	No	No	No	No	Alive or dead of other cause	42	Alive	1st of 2 or more primaries	63	6134673
White	Male	8170	T2	N0	0	No radiation and/or cancer-directed surgery	Not recommended	Yes	45	10	No	No	No	No	Dead (attributable to this cancer dx)	9	Dead	One primary only	57	6134697
Other (American Indian/AK Native, Asian/Pacific Islander)	Female	8170	T2	N0	0	No radiation and/or cancer-directed surgery	Not recommended	Yes	20	10	No	No	No	No	Dead (attributable to this cancer dx)	15	Dead	One primary only	74	6134733
Other (American Indian/AK Native, Asian/Pacific Islander)	Male	8170	T3a	N0	0	No radiation and/or cancer-directed surgery	Not recommended	Yes	85	10	No	No	No	No	Dead (attributable to this cancer dx)	24	Dead	One primary only	68	6134769
White	Male	8170	T3a	N0	0	No radiation and/or cancer-directed surgery	Not recommended	No/Unknown	570	998	No	No	No	No	Dead (attributable to this cancer dx)	0	Dead	One primary only	65	6134841
White	Male	8170	T2	N0	0	No radiation and/or cancer-directed surgery	Not recommended	No/Unknown	20	10	No	No	No	No	Alive or dead of other cause	41	Alive	One primary only	61	6134843
Black	Male	8170	T1	N1	0	No radiation and/or cancer-directed surgery	Not recommended	No/Unknown	999	999	Yes	No	No	No	Dead (attributable to this cancer dx)	3	Dead	One primary only	62	6135038
White	Male	8170	T3a	N0	0	No radiation and/or cancer-directed surgery	Not recommended	No/Unknown	62	998	Yes	No	No	No	Dead (attributable to this cancer dx)	2	Dead	One primary only	65	6135155
White	Male	8170	T2	N0	0	No radiation and/or cancer-directed surgery	Not recommended	Yes	23	20	No	No	No	No	Alive or dead of other cause	40	Alive	One primary only	79	6135317
Other (American Indian/AK Native, Asian/Pacific Islander)	Female	8170	T2	N0	0	No radiation and/or cancer-directed surgery	Not recommended	No/Unknown	33	10	No	No	No	No	Dead (attributable to this cancer dx)	0	Dead	One primary only	70	6135701
Other (American Indian/AK Native, Asian/Pacific Islander)	Male	8170	T3a	N0	0	No radiation and/or cancer-directed surgery	Not recommended	No/Unknown	120	10	No	No	No	Yes	Dead (attributable to this cancer dx)	2	Dead	One primary only	31	6135818
White	Male	8170	T1	N0	0	No radiation and/or cancer-directed surgery	Not recommended	Yes	35	20	No	No	No	No	Alive or dead of other cause	42	Alive	One primary only	62	6135923
Other (American Indian/AK Native, Asian/Pacific Islander)	Male	8170	T1	N0	61	No radiation and/or cancer-directed surgery	Surgery performed	Yes	38	20	No	No	No	No	Alive or dead of other cause	43	Alive	One primary only	58	6136033
White	Male	8170	T3b	N0	23	No radiation and/or cancer-directed surgery	Surgery performed	No/Unknown	40	10	No	No	No	No	Dead (attributable to this cancer dx)	10	Dead	One primary only	57	6136092
Other (American Indian/AK Native, Asian/Pacific Islander)	Female	8170	T2	N0	0	No radiation and/or cancer-directed surgery	Not recommended	Yes	6	10	No	No	No	No	Alive or dead of other cause	42	Alive	One primary only	75	6136523
Other (American Indian/AK Native, Asian/Pacific Islander)	Female	8170	T1	N0	22	No radiation and/or cancer-directed surgery	Surgery performed	No/Unknown	38	20	No	No	No	No	Alive or dead of other cause	42	Alive	One primary only	68	6136810
White	Male	8170	T1	N0	16	No radiation and/or cancer-directed surgery	Surgery performed	No/Unknown	17	10	No	No	No	No	Alive or dead of other cause	36	Alive	One primary only	55	6137280
Other (American Indian/AK Native, Asian/Pacific Islander)	Female	8170	TX	N0	61	No radiation and/or cancer-directed surgery	Surgery performed	Yes	17	20	No	No	No	No	Alive or dead of other cause	46	Alive	One primary only	50	6137672
White	Female	8170	T1	NX	0	No radiation and/or cancer-directed surgery	Not recommended	No/Unknown	43	10	No	No	No	No	Dead (attributable to this cancer dx)	3	Dead	One primary only	84	6137711
White	Female	8170	T3a	N0	0	No radiation and/or cancer-directed surgery	Not recommended	Yes	70	10	No	No	No	No	Dead (attributable to this cancer dx)	4	Dead	One primary only	62	6137794
White	Male	8170	T3a	N1	0	No radiation and/or cancer-directed surgery	Not recommended	No/Unknown	100	20	Yes	No	No	No	Dead (attributable to this cancer dx)	0	Dead	One primary only	63	6138318
Black	Male	8175	T1	N0	24	No radiation and/or cancer-directed surgery	Surgery performed	No/Unknown	53	10	No	No	No	No	Alive or dead of other cause	9	Dead	One primary only	67	6138327
White	Male	8170	T3a	N1	0	No radiation and/or cancer-directed surgery	Not recommended	No/Unknown	65	10	No	No	No	No	Alive or dead of other cause	14	Alive	One primary only	60	6138328
Black	Male	8170	T1	N0	0	No radiation and/or cancer-directed surgery	Not recommended	Yes	35	10	No	No	No	No	Alive or dead of other cause	12	Dead	One primary only	61	6138331
Black	Male	8170	T4	N0	0	No radiation and/or cancer-directed surgery	Not recommended	No/Unknown	100	10	No	No	No	No	Dead (attributable to this cancer dx)	1	Dead	One primary only	57	6138432
Black	Male	8170	T1	N0	0	No radiation and/or cancer-directed surgery	Not recommended	No/Unknown	15	10	No	No	No	No	Alive or dead of other cause	4	Dead	One primary only	60	6138479
White	Male	8170	TX	N0	0	No radiation and/or cancer-directed surgery	Not recommended	No/Unknown	999	10	No	No	No	No	Dead (attributable to this cancer dx)	0	Dead	One primary only	65	6138584
White	Male	8170	T1	N1	0	No radiation and/or cancer-directed surgery	Not recommended	No/Unknown	80	10	No	No	No	No	Dead (attributable to this cancer dx)	1	Dead	One primary only	55	6138851
Black	Male	8170	T1	N0	0	No radiation and/or cancer-directed surgery	Not recommended	No/Unknown	55	10	No	No	No	No	Alive or dead of other cause	39	Alive	One primary only	79	6139156
Other (American Indian/AK Native, Asian/Pacific Islander)	Male	8170	TX	NX	0	No radiation and/or cancer-directed surgery	Not recommended	No/Unknown	999	999	No	No	No	No	Dead (attributable to this cancer dx)	6	Dead	One primary only	42	6139476
White	Male	8170	T2	N0	16	No radiation and/or cancer-directed surgery	Surgery performed	No/Unknown	23	20	No	No	No	No	Dead (attributable to this cancer dx)	13	Dead	One primary only	60	6139481
Black	Male	8170	T3b	N0	0	No radiation and/or cancer-directed surgery	Not recommended	No/Unknown	999	10	No	No	No	No	Dead (attributable to this cancer dx)	1	Dead	One primary only	52	6140062
Other (American Indian/AK Native, Asian/Pacific Islander)	Female	8170	T3a	N0	0	No radiation and/or cancer-directed surgery	Not recommended	Yes	121	10	No	No	No	No	Dead (attributable to this cancer dx)	2	Dead	One primary only	55	6140089
White	Male	8170	TX	N0	0	No radiation and/or cancer-directed surgery	Not recommended	No/Unknown	37	10	No	No	No	No	Dead (attributable to this cancer dx)	0	Dead	One primary only	59	6140169
Other (American Indian/AK Native, Asian/Pacific Islander)	Female	8170	T1	N0	0	No radiation and/or cancer-directed surgery	Not recommended	Yes	11	10	No	No	No	No	Dead (attributable to this cancer dx)	35	Dead	One primary only	58	6140286
White	Male	8170	T1	N0	0	No radiation and/or cancer-directed surgery	Not recommended	Yes	999	20	No	No	No	No	Alive or dead of other cause	42	Alive	One primary only	79	6140297
Other (American Indian/AK Native, Asian/Pacific Islander)	Male	8170	T2	N0	61	No radiation and/or cancer-directed surgery	Surgery performed	Yes	38	20	No	No	No	No	Alive or dead of other cause	45	Alive	One primary only	54	6140538
Other (American Indian/AK Native, Asian/Pacific Islander)	Male	8170	T1	N0	0	No radiation and/or cancer-directed surgery	Not recommended	Yes	43	10	No	No	No	No	Dead (attributable to this cancer dx)	19	Dead	One primary only	67	6140603
Black	Male	8170	T3b	N0	0	No radiation and/or cancer-directed surgery	Recommended but not performed, unknown reason	No/Unknown	160	10	No	No	No	Yes	Dead (attributable to this cancer dx)	2	Dead	One primary only	73	6140826
Other (American Indian/AK Native, Asian/Pacific Islander)	Female	8170	T1	N0	16	No radiation and/or cancer-directed surgery	Surgery performed	No/Unknown	58	10	No	No	No	No	Dead (attributable to this cancer dx)	4	Dead	One primary only	86	6141107
Black	Male	8170	T4	N1	0	No radiation and/or cancer-directed surgery	Not recommended, contraindicated due to other cond; autopsy only (1973-2002)	No/Unknown	58	10	Yes	No	Yes	No	Dead (attributable to this cancer dx)	25	Dead	One primary only	56	6141129
Other (American Indian/AK Native, Asian/Pacific Islander)	Male	8170	T3a	N0	0	No radiation and/or cancer-directed surgery	Not recommended	No/Unknown	80	20	No	No	No	Yes	Dead (attributable to this cancer dx)	0	Dead	One primary only	81	6141151
White	Male	8170	T3b	N0	0	No radiation and/or cancer-directed surgery	Not recommended	No/Unknown	48	10	No	No	No	No	Dead (attributable to this cancer dx)	2	Dead	One primary only	68	6141265
White	Male	8170	T3a	N0	0	No radiation and/or cancer-directed surgery	Not recommended, contraindicated due to other cond; autopsy only (1973-2002)	No/Unknown	83	10	No	No	No	No	Dead (attributable to this cancer dx)	0	Dead	One primary only	70	6141334
Black	Male	8170	T3b	N0	0	No radiation and/or cancer-directed surgery	Not recommended	No/Unknown	94	10	No	No	No	No	Dead (attributable to this cancer dx)	3	Dead	One primary only	64	6141349
White	Male	8170	T2	N0	16	No radiation and/or cancer-directed surgery	Surgery performed	Yes	27	10	No	No	No	No	Alive or dead of other cause	44	Alive	1st of 2 or more primaries	63	6141464
Black	Male	8170	T2	N0	0	No radiation and/or cancer-directed surgery	Not recommended	Yes	18	999	No	No	No	No	Alive or dead of other cause	53	Alive	One primary only	63	6141488
White	Male	8170	T3a	N0	0	No radiation and/or cancer-directed surgery	Not recommended	Yes	114	10	No	No	No	No	Dead (attributable to this cancer dx)	7	Dead	One primary only	59	6141564
Other (American Indian/AK Native, Asian/Pacific Islander)	Male	8170	T2	N0	0	No radiation and/or cancer-directed surgery	Not recommended	Yes	150	20	No	No	No	No	Dead (attributable to this cancer dx)	5	Dead	One primary only	78	6141875
Other (American Indian/AK Native, Asian/Pacific Islander)	Male	8170	T1	N0	10	No radiation and/or cancer-directed surgery	Surgery performed	Yes	999	999	No	No	No	No	Dead (attributable to this cancer dx)	29	Dead	One primary only	55	6141904
Black	Female	8170	T2	N0	0	No radiation and/or cancer-directed surgery	Not recommended	Yes	15	10	No	No	No	No	Alive or dead of other cause	38	Alive	One primary only	58	6141940
Other (American Indian/AK Native, Asian/Pacific Islander)	Male	8170	T1	N0	0	No radiation and/or cancer-directed surgery	Not recommended	Yes	34	20	No	No	No	No	Alive or dead of other cause	38	Alive	One primary only	63	6141941
Black	Male	8170	T3a	N0	0	No radiation and/or cancer-directed surgery	Not recommended	No/Unknown	57	10	No	No	No	No	Dead (attributable to this cancer dx)	3	Dead	One primary only	58	6141944
White	Male	8170	T2	N0	0	No radiation and/or cancer-directed surgery	Not recommended	Yes	50	10	No	No	No	No	Alive or dead of other cause	4	Alive	One primary only	66	6141947
Other (American Indian/AK Native, Asian/Pacific Islander)	Male	8170	T1	N0	0	No radiation and/or cancer-directed surgery	Recommended but not performed, patient refused	No/Unknown	25	10	No	No	No	No	Alive or dead of other cause	9	Alive	One primary only	47	6141954
White	Male	8170	T1	N0	0	No radiation and/or cancer-directed surgery	Recommended, unknown if performed	Yes	35	10	No	No	No	No	Dead (attributable to this cancer dx)	30	Dead	One primary only	60	6142090
White	Male	8170	T1	N0	0	No radiation and/or cancer-directed surgery	Not recommended	Yes	36	20	No	No	No	No	Dead (attributable to this cancer dx)	30	Dead	One primary only	63	6142101
Other (American Indian/AK Native, Asian/Pacific Islander)	Male	8170	T4	N0	37	No radiation and/or cancer-directed surgery	Surgery performed	No/Unknown	183	20	No	No	No	No	Dead (attributable to this cancer dx)	6	Dead	One primary only	67	6142280
Other (American Indian/AK Native, Asian/Pacific Islander)	Female	8170	T1	N0	30	No radiation and/or cancer-directed surgery	Surgery performed	No/Unknown	25	10	No	No	No	No	Alive or dead of other cause	46	Alive	1st of 2 or more primaries	67	6142302
White	Male	8170	T1	N0	0	No radiation and/or cancer-directed surgery	Not recommended	No/Unknown	27	998	No	No	No	No	Dead (attributable to this cancer dx)	1	Dead	One primary only	63	6142315
Other (American Indian/AK Native, Asian/Pacific Islander)	Male	8170	T3a	N0	0	No radiation and/or cancer-directed surgery	Not recommended	No/Unknown	55	20	No	No	No	No	Dead (attributable to this cancer dx)	1	Dead	One primary only	45	6142365
Other (American Indian/AK Native, Asian/Pacific Islander)	Male	8170	T1	N0	0	No radiation and/or cancer-directed surgery	Not recommended	Yes	999	10	No	No	No	No	Dead (attributable to this cancer dx)	26	Dead	One primary only	57	6142620
Other (American Indian/AK Native, Asian/Pacific Islander)	Male	8170	T1	N0	0	No radiation and/or cancer-directed surgery	Not recommended	Yes	88	10	No	No	No	No	Dead (attributable to this cancer dx)	8	Dead	One primary only	62	6142641
White	Male	8170	T1	N0	10	No radiation and/or cancer-directed surgery	Surgery performed	Yes	21	20	No	No	No	No	Alive or dead of other cause	46	Alive	One primary only	70	6142652
White	Male	8170	T1	N0	0	No radiation and/or cancer-directed surgery	Recommended, unknown if performed	Yes	20	10	No	No	No	No	Alive or dead of other cause	48	Alive	One primary only	58	6142692
White	Female	8170	T1	N0	0	No radiation and/or cancer-directed surgery	Not recommended	Yes	23	10	No	No	No	No	Alive or dead of other cause	40	Alive	One primary only	62	6142825
White	Female	8170	T2	N0	16	No radiation and/or cancer-directed surgery	Surgery performed	No/Unknown	32	20	No	No	No	No	Alive or dead of other cause	15	Dead	One primary only	49	6142903
White	Male	8170	TX	N1	0	No radiation and/or cancer-directed surgery	Not recommended	Yes	999	10	No	No	No	No	Dead (attributable to this cancer dx)	16	Dead	1st of 2 or more primaries	85	6142957
White	Male	8170	T1	N0	0	No radiation and/or cancer-directed surgery	Not recommended	No/Unknown	42	10	No	No	No	No	Dead (attributable to this cancer dx)	0	Dead	One primary only	77	6143079
White	Male	8170	T2	N0	0	No radiation and/or cancer-directed surgery	Not recommended	No/Unknown	60	10	No	No	No	No	Dead (attributable to this cancer dx)	34	Dead	One primary only	79	6143144
White	Male	8170	T3b	N0	0	No radiation and/or cancer-directed surgery	Not recommended	Yes	86	20	No	No	No	No	Dead (attributable to this cancer dx)	16	Dead	One primary only	60	6143214
Other (American Indian/AK Native, Asian/Pacific Islander)	Male	8170	T1	N0	16	No radiation and/or cancer-directed surgery	Surgery performed	No/Unknown	28	20	No	No	No	No	Alive or dead of other cause	42	Alive	One primary only	64	6143220
Other (American Indian/AK Native, Asian/Pacific Islander)	Male	8170	T1	N0	0	No radiation and/or cancer-directed surgery	Not recommended	Yes	20	10	No	No	No	No	Alive or dead of other cause	41	Alive	One primary only	62	6143223
White	Male	8170	T1	N0	16	No radiation and/or cancer-directed surgery	Surgery performed	No/Unknown	26	20	No	No	No	No	Alive or dead of other cause	37	Alive	One primary only	48	6143496
Other (American Indian/AK Native, Asian/Pacific Islander)	Male	8170	T1	N0	0	No radiation and/or cancer-directed surgery	Not recommended	No/Unknown	211	10	No	No	No	No	Alive or dead of other cause	0	Dead	One primary only	78	6143508
Black	Male	8170	T1	N0	16	No radiation and/or cancer-directed surgery	Surgery performed	No/Unknown	22	10	No	No	No	No	Alive or dead of other cause	39	Alive	One primary only	56	6143763
White	Male	8170	T1	N0	0	No radiation and/or cancer-directed surgery	Not recommended	No/Unknown	50	10	No	No	No	No	Alive or dead of other cause	30	Alive	One primary only	52	6143974
Other (American Indian/AK Native, Asian/Pacific Islander)	Male	8170	T2	N0	21	No radiation and/or cancer-directed surgery	Surgery performed	No/Unknown	67	20	No	No	No	No	Alive or dead of other cause	40	Alive	1st of 2 or more primaries	57	6144069
White	Female	8170	T1	N0	61	No radiation and/or cancer-directed surgery	Surgery performed	Yes	37	10	No	No	No	No	Alive or dead of other cause	42	Alive	1st of 2 or more primaries	66	6144075
Other (American Indian/AK Native, Asian/Pacific Islander)	Male	8170	T1	N0	16	No radiation and/or cancer-directed surgery	Surgery performed	Yes	22	20	No	No	No	No	Alive or dead of other cause	50	Alive	One primary only	57	6144077
Other (American Indian/AK Native, Asian/Pacific Islander)	Male	8170	T1	N0	0	No radiation and/or cancer-directed surgery	Not recommended	No/Unknown	99	10	No	No	No	No	Alive or dead of other cause	11	Dead	One primary only	90	6144241
Other (American Indian/AK Native, Asian/Pacific Islander)	Male	8170	TX	NX	0	No radiation and/or cancer-directed surgery	Not recommended	No/Unknown	999	999	No	No	No	No	Dead (attributable to this cancer dx)	3	Dead	One primary only	93	6144274
Black	Male	8170	T2	N0	0	No radiation and/or cancer-directed surgery	Not recommended	Yes	27	10	No	No	No	No	Dead (attributable to this cancer dx)	16	Dead	One primary only	72	6144596
Other (American Indian/AK Native, Asian/Pacific Islander)	Male	8170	T2	N0	0	No radiation and/or cancer-directed surgery	Not recommended	Yes	14	10	No	No	No	No	Alive or dead of other cause	41	Alive	One primary only	49	6144734
White	Female	8170	T1	N0	0	No radiation and/or cancer-directed surgery	Not recommended	Yes	29	10	No	No	No	No	Dead (attributable to this cancer dx)	28	Dead	One primary only	78	6144895
Other (American Indian/AK Native, Asian/Pacific Islander)	Female	8170	T3a	N0	0	No radiation and/or cancer-directed surgery	Not recommended	No/Unknown	76	10	No	No	No	No	Dead (attributable to this cancer dx)	0	Dead	One primary only	74	6145057
White	Male	8170	T1	N0	16	No radiation and/or cancer-directed surgery	Surgery performed	No/Unknown	25	10	No	No	No	No	Alive or dead of other cause	38	Alive	One primary only	62	6145112
Other (American Indian/AK Native, Asian/Pacific Islander)	Male	8170	T1	N0	0	No radiation and/or cancer-directed surgery	Not recommended	Yes	57	10	No	No	No	No	Alive or dead of other cause	39	Alive	One primary only	59	6145123
White	Male	8170	T1	N0	10	No radiation and/or cancer-directed surgery	Surgery performed	No/Unknown	30	10	No	No	No	No	Dead (attributable to this cancer dx)	21	Dead	One primary only	57	6145126
White	Female	8170	T3a	N0	0	No radiation and/or cancer-directed surgery	Not recommended	Yes	62	10	No	No	No	No	Dead (attributable to this cancer dx)	11	Dead	One primary only	60	6145136
White	Male	8170	T1	N0	22	No radiation and/or cancer-directed surgery	Surgery performed	No/Unknown	53	20	No	No	No	No	Alive or dead of other cause	40	Alive	One primary only	68	6145196
White	Male	8170	T1	N0	0	No radiation and/or cancer-directed surgery	Not recommended	Yes	26	10	No	No	No	No	Dead (attributable to this cancer dx)	15	Dead	One primary only	69	6145227
Other (American Indian/AK Native, Asian/Pacific Islander)	Male	8170	T1	N0	16	No radiation and/or cancer-directed surgery	Surgery performed	Yes	21	10	No	No	No	No	Dead (attributable to this cancer dx)	30	Dead	One primary only	56	6145399
White	Male	8170	T2	N0	0	No radiation and/or cancer-directed surgery	Recommended but not performed, patient refused	Yes	48	10	No	No	No	No	Alive or dead of other cause	40	Alive	One primary only	65	6145514
White	Male	8170	T2	N0	0	No radiation and/or cancer-directed surgery	Recommended, unknown if performed	Yes	22	20	No	No	No	No	Alive or dead of other cause	54	Alive	One primary only	58	6145558
White	Male	8170	T1	N0	0	No radiation and/or cancer-directed surgery	Not recommended	Yes	46	10	No	No	No	No	Dead (attributable to this cancer dx)	9	Dead	One primary only	67	6145835
Other (American Indian/AK Native, Asian/Pacific Islander)	Male	8170	T2	N0	10	No radiation and/or cancer-directed surgery	Surgery performed	No/Unknown	26	10	No	No	No	No	Alive or dead of other cause	37	Alive	One primary only	63	6145838
Black	Male	8170	T1	N0	0	No radiation and/or cancer-directed surgery	Not recommended	Yes	33	10	No	No	No	No	Alive or dead of other cause	40	Alive	One primary only	53	6145852
Black	Male	8170	T2	N0	0	No radiation and/or cancer-directed surgery	Not recommended	Yes	35	10	No	No	No	No	Alive or dead of other cause	15	Dead	One primary only	58	6145866
White	Female	8170	TX	N0	0	No radiation and/or cancer-directed surgery	Not recommended	No/Unknown	999	10	No	No	No	No	Alive or dead of other cause	0	Dead	One primary only	50	6145914
Black	Male	8170	T1	N0	0	No radiation and/or cancer-directed surgery	Not recommended	No/Unknown	999	999	Yes	No	No	Yes	Dead (attributable to this cancer dx)	2	Dead	One primary only	58	6145933
White	Female	8170	T1	N0	16	No radiation and/or cancer-directed surgery	Surgery performed	Yes	20	20	No	No	No	No	Alive or dead of other cause	39	Alive	One primary only	61	6146031
White	Male	8170	T1	N0	0	No radiation and/or cancer-directed surgery	Not recommended	Yes	50	10	No	No	No	No	Dead (attributable to this cancer dx)	20	Dead	One primary only	73	6146147
Other (American Indian/AK Native, Asian/Pacific Islander)	Male	8170	T2	N0	0	No radiation and/or cancer-directed surgery	Not recommended	Yes	991	10	No	No	No	No	Alive or dead of other cause	1	Dead	One primary only	43	6146369
White	Male	8170	T2	N0	0	No radiation and/or cancer-directed surgery	Recommended, unknown if performed	Yes	16	20	No	No	No	No	Alive or dead of other cause	37	Alive	One primary only	66	6146447
Black	Male	8170	T1	N0	0	No radiation and/or cancer-directed surgery	Not recommended	Yes	28	10	No	No	No	No	Alive or dead of other cause	24	Dead	One primary only	62	6146500
White	Male	8170	T1	N0	0	No radiation and/or cancer-directed surgery	Not recommended	Yes	33	10	No	No	No	No	Alive or dead of other cause	26	Dead	1st of 2 or more primaries	61	6146505
Other (American Indian/AK Native, Asian/Pacific Islander)	Female	8170	T1	N0	0	No radiation and/or cancer-directed surgery	Not recommended	Yes	42	10	No	No	No	No	Alive or dead of other cause	40	Alive	One primary only	77	6146508
White	Male	8170	T2	N0	0	No radiation and/or cancer-directed surgery	Not recommended	No/Unknown	11	20	No	No	No	No	Alive or dead of other cause	40	Alive	One primary only	67	6146512
White	Male	8170	T2	N0	0	No radiation and/or cancer-directed surgery	Not recommended	Yes	120	20	No	No	No	No	Dead (attributable to this cancer dx)	20	Dead	One primary only	83	6146713
White	Male	8170	T1	N0	0	No radiation and/or cancer-directed surgery	Not recommended	Yes	999	10	No	No	No	Yes	Dead (attributable to this cancer dx)	0	Dead	One primary only	72	6146799
Other (American Indian/AK Native, Asian/Pacific Islander)	Male	8170	T4	N0	0	No radiation and/or cancer-directed surgery	Not recommended	No/Unknown	87	10	No	No	No	No	Dead (attributable to this cancer dx)	0	Dead	One primary only	55	6146936
Black	Male	8170	T1	N0	0	No radiation and/or cancer-directed surgery	Recommended, unknown if performed	No/Unknown	18	10	No	No	No	No	Alive or dead of other cause	15	Dead	One primary only	57	6146948
White	Male	8170	T2	N0	0	No radiation and/or cancer-directed surgery	Not recommended	Yes	12	20	No	No	No	No	Alive or dead of other cause	11	Dead	One primary only	52	6147093
White	Male	8170	T1	N0	0	No radiation and/or cancer-directed surgery	Not recommended	Yes	28	20	No	No	No	No	Alive or dead of other cause	3	Dead	One primary only	66	6147399
Other (American Indian/AK Native, Asian/Pacific Islander)	Male	8170	TX	NX	0	No radiation and/or cancer-directed surgery	Not recommended	Yes	999	999	No	No	No	No	Dead (attributable to this cancer dx)	10	Dead	One primary only	72	6147405
Black	Female	8170	T2	N0	0	No radiation and/or cancer-directed surgery	Not recommended	Yes	28	20	No	No	No	No	Alive or dead of other cause	38	Alive	One primary only	65	6147407
White	Male	8170	T2	N0	0	No radiation and/or cancer-directed surgery	Not recommended	Yes	47	10	No	No	No	No	Dead (attributable to this cancer dx)	18	Dead	One primary only	55	6147415
White	Male	8170	T3b	N0	0	No radiation and/or cancer-directed surgery	Not recommended	No/Unknown	999	10	No	No	No	No	Dead (attributable to this cancer dx)	1	Dead	One primary only	63	6147425
Black	Male	8170	T1	N0	16	No radiation and/or cancer-directed surgery	Surgery performed	No/Unknown	25	10	No	No	No	No	Alive or dead of other cause	42	Alive	One primary only	64	6147471
White	Female	8170	T2	N0	16	No radiation and/or cancer-directed surgery	Surgery performed	No/Unknown	10	10	No	No	No	No	Alive or dead of other cause	44	Alive	One primary only	56	6147503
Other (American Indian/AK Native, Asian/Pacific Islander)	Female	8170	T3b	N0	0	No radiation and/or cancer-directed surgery	Not recommended	No/Unknown	66	10	No	No	No	No	Dead (attributable to this cancer dx)	1	Dead	One primary only	81	6147549
White	Male	8170	T3b	N1	0	No radiation and/or cancer-directed surgery	Not recommended	No/Unknown	73	20	No	No	No	No	Dead (attributable to this cancer dx)	2	Dead	One primary only	70	6147550
White	Male	8170	T3b	N0	0	No radiation and/or cancer-directed surgery	Recommended, unknown if performed	Yes	67	10	No	No	No	No	Dead (attributable to this cancer dx)	1	Dead	One primary only	67	6147553
White	Female	8170	T2	N0	0	No radiation and/or cancer-directed surgery	Not recommended	Yes	30	10	No	No	No	No	Alive or dead of other cause	29	Dead	One primary only	58	6147558
White	Male	8170	T3a	N0	0	No radiation and/or cancer-directed surgery	Not recommended	Yes	60	20	Yes	No	No	Yes	Dead (attributable to this cancer dx)	16	Dead	One primary only	65	6147603
Black	Male	8170	T3b	N1	0	No radiation and/or cancer-directed surgery	Not recommended	Yes	999	10	No	No	No	No	Dead (attributable to this cancer dx)	5	Dead	One primary only	65	6148068
Other (American Indian/AK Native, Asian/Pacific Islander)	Female	8170	T1	N0	0	No radiation and/or cancer-directed surgery	Not recommended	Yes	50	20	No	No	No	No	Dead (attributable to this cancer dx)	41	Dead	One primary only	72	6148083
White	Female	8170	T1	N0	0	No radiation and/or cancer-directed surgery	Not recommended	Yes	28	10	No	No	No	No	Dead (attributable to this cancer dx)	12	Dead	One primary only	71	6148086
White	Male	8170	T1	N0	16	No radiation and/or cancer-directed surgery	Surgery performed	No/Unknown	35	10	No	No	No	No	Alive or dead of other cause	36	Alive	One primary only	54	6148301
White	Male	8170	T3a	NX	0	No radiation and/or cancer-directed surgery	Not recommended	Yes	130	20	No	No	No	No	Alive or dead of other cause	42	Alive	One primary only	50	6148329
White	Male	8170	T1	N0	0	No radiation and/or cancer-directed surgery	Not recommended	Yes	16	10	No	No	No	No	Alive or dead of other cause	41	Alive	One primary only	57	6148516
White	Female	8170	T3b	N0	0	No radiation and/or cancer-directed surgery	Not recommended	Yes	51	10	No	No	No	No	Dead (attributable to this cancer dx)	8	Dead	One primary only	67	6148661
White	Female	8170	T2	N0	0	No radiation and/or cancer-directed surgery	Not recommended	Yes	42	10	No	No	No	No	Alive or dead of other cause	35	Dead	One primary only	70	6148756
White	Male	8170	T2	N0	0	No radiation and/or cancer-directed surgery	Not recommended	Yes	43	20	No	No	No	No	Dead (attributable to this cancer dx)	24	Dead	1st of 2 or more primaries	54	6148819
Other (American Indian/AK Native, Asian/Pacific Islander)	Male	8170	T2	N0	0	No radiation and/or cancer-directed surgery	Not recommended	Yes	40	20	No	No	No	No	Dead (attributable to this cancer dx)	2	Dead	One primary only	74	6149068
White	Male	8170	T1	NX	0	No radiation and/or cancer-directed surgery	Recommended, unknown if performed	Yes	20	10	No	No	No	No	Dead (attributable to this cancer dx)	27	Dead	One primary only	57	6149223
Other (American Indian/AK Native, Asian/Pacific Islander)	Male	8170	T3a	N0	0	No radiation and/or cancer-directed surgery	Not recommended	Yes	54	10	No	No	No	No	Dead (attributable to this cancer dx)	18	Dead	One primary only	56	6149240
White	Female	8170	T1	N0	16	No radiation and/or cancer-directed surgery	Surgery performed	No/Unknown	30	10	No	No	No	No	Alive or dead of other cause	19	Dead	One primary only	70	6149338
Other (American Indian/AK Native, Asian/Pacific Islander)	Male	8170	T1	N0	61	No radiation and/or cancer-directed surgery	Surgery performed	No/Unknown	20	20	No	No	No	No	Alive or dead of other cause	36	Alive	One primary only	55	6149412
Other (American Indian/AK Native, Asian/Pacific Islander)	Male	8170	TX	N0	0	No radiation and/or cancer-directed surgery	Not recommended	No/Unknown	47	10	No	No	No	No	Dead (attributable to this cancer dx)	2	Dead	One primary only	72	6149432
Black	Male	8170	TX	N0	0	No radiation and/or cancer-directed surgery	Not recommended	No/Unknown	999	10	Yes	No	No	No	Dead (attributable to this cancer dx)	0	Dead	One primary only	63	6149529
White	Male	8170	T1	N0	0	No radiation and/or cancer-directed surgery	Recommended, unknown if performed	Yes	25	10	No	No	No	No	Alive or dead of other cause	39	Alive	One primary only	64	6149559
Black	Male	8170	T3a	N1	0	No radiation and/or cancer-directed surgery	Not recommended	Yes	160	10	Yes	No	No	Yes	Dead (attributable to this cancer dx)	7	Dead	One primary only	64	6149564
Other (American Indian/AK Native, Asian/Pacific Islander)	Female	8170	T2	N0	16	No radiation and/or cancer-directed surgery	Surgery performed	No/Unknown	31	10	No	No	No	No	Dead (attributable to this cancer dx)	28	Dead	One primary only	62	6149741
Other (American Indian/AK Native, Asian/Pacific Islander)	Male	8170	T1	N0	0	No radiation and/or cancer-directed surgery	Not recommended	No/Unknown	110	10	No	No	No	No	Dead (attributable to this cancer dx)	1	Dead	One primary only	58	6149975
White	Male	8170	T1	N0	36	No radiation and/or cancer-directed surgery	Surgery performed	No/Unknown	96	20	No	No	No	No	Alive or dead of other cause	36	Alive	One primary only	70	6150011
White	Male	8170	T1	N0	0	No radiation and/or cancer-directed surgery	Not recommended	Yes	19	999	No	No	No	No	Alive or dead of other cause	39	Alive	One primary only	73	6150202
White	Female	8170	T1	N0	0	No radiation and/or cancer-directed surgery	Not recommended	No/Unknown	45	20	No	No	No	No	Alive or dead of other cause	70	Alive	One primary only	65	6150210
Other (American Indian/AK Native, Asian/Pacific Islander)	Male	8170	TX	N0	0	No radiation and/or cancer-directed surgery	Not recommended	No/Unknown	999	10	No	No	No	No	Dead (attributable to this cancer dx)	0	Dead	One primary only	86	6150351
White	Male	8170	T1	N0	0	No radiation and/or cancer-directed surgery	Not recommended	Yes	20	10	No	No	No	No	Dead (attributable to this cancer dx)	19	Dead	One primary only	56	6150396
White	Male	8170	T1	N0	0	No radiation and/or cancer-directed surgery	Not recommended	Yes	28	10	No	No	No	No	Dead (attributable to this cancer dx)	28	Dead	One primary only	53	6150417
White	Male	8170	T1	N0	0	No radiation and/or cancer-directed surgery	Not recommended	Yes	12	10	No	No	No	No	Alive or dead of other cause	43	Alive	One primary only	60	6150430
Other (American Indian/AK Native, Asian/Pacific Islander)	Female	8170	T1	N0	21	No radiation and/or cancer-directed surgery	Surgery performed	No/Unknown	32	20	No	No	No	No	Alive or dead of other cause	37	Alive	One primary only	62	6150609
Black	Female	8170	T2	N0	0	No radiation and/or cancer-directed surgery	Not recommended	Yes	999	10	No	No	No	No	Alive or dead of other cause	9	Dead	One primary only	60	6150616
White	Male	8170	T1	N0	0	No radiation and/or cancer-directed surgery	Recommended, unknown if performed	Yes	30	10	No	No	No	No	Alive or dead of other cause	36	Alive	One primary only	62	6150617
White	Male	8170	T1	N0	0	No radiation and/or cancer-directed surgery	Not recommended	No/Unknown	31	20	No	No	No	No	Dead (attributable to this cancer dx)	0	Dead	One primary only	82	6150726
Other (American Indian/AK Native, Asian/Pacific Islander)	Male	8170	T2	N0	37	No radiation and/or cancer-directed surgery	Surgery performed	No/Unknown	15	10	No	No	No	No	Alive or dead of other cause	39	Alive	One primary only	69	6150728
White	Male	8170	T2	N0	0	No radiation and/or cancer-directed surgery	Not recommended	Yes	67	20	No	No	No	No	Alive or dead of other cause	41	Alive	One primary only	74	6150746
White	Male	8170	TX	NX	0	No radiation and/or cancer-directed surgery	Not recommended	Yes	999	999	No	No	No	No	Dead (attributable to this cancer dx)	24	Dead	One primary only	57	6151147
White	Male	8170	T1	N0	10	No radiation and/or cancer-directed surgery	Surgery performed	No/Unknown	23	20	No	No	No	No	Dead (attributable to this cancer dx)	27	Dead	One primary only	61	6151215
White	Male	8170	T4	N0	0	No radiation and/or cancer-directed surgery	Not recommended	No/Unknown	80	999	No	No	No	No	Dead (attributable to this cancer dx)	0	Dead	One primary only	59	6151225
White	Male	8170	T3b	N1	0	No radiation and/or cancer-directed surgery	Not recommended	No/Unknown	77	10	No	No	No	No	Dead (attributable to this cancer dx)	1	Dead	One primary only	68	6151358
Black	Male	8170	T2	N0	0	No radiation and/or cancer-directed surgery	Not recommended	Yes	22	10	No	No	No	No	Dead (attributable to this cancer dx)	17	Dead	One primary only	63	6151511
White	Female	8170	T3a	N0	0	No radiation and/or cancer-directed surgery	Not recommended	No/Unknown	68	10	No	No	No	No	Alive or dead of other cause	8	Dead	One primary only	72	6151616
White	Male	8170	T1	N0	23	No radiation and/or cancer-directed surgery	Surgery performed	No/Unknown	25	10	No	No	No	No	Dead (attributable to this cancer dx)	28	Dead	One primary only	55	6151768
Black	Male	8170	T1	N0	20	No radiation and/or cancer-directed surgery	Surgery performed	No/Unknown	19	10	No	No	No	No	Alive or dead of other cause	39	Alive	One primary only	64	6151820
Black	Male	8170	T2	N0	0	No radiation and/or cancer-directed surgery	Not recommended	Yes	25	10	No	No	No	No	Dead (attributable to this cancer dx)	13	Dead	One primary only	58	6151830
White	Male	8170	T4	N0	0	No radiation and/or cancer-directed surgery	Not recommended	Yes	149	10	No	No	No	No	Dead (attributable to this cancer dx)	3	Dead	One primary only	67	6151832
White	Male	8170	T1	N0	0	No radiation and/or cancer-directed surgery	Not recommended	No/Unknown	17	20	No	No	No	No	Alive or dead of other cause	52	Alive	One primary only	60	6152019
White	Female	8170	TX	N0	0	No radiation and/or cancer-directed surgery	Not recommended	Yes	999	10	No	No	No	No	Dead (attributable to this cancer dx)	10	Dead	One primary only	58	6152061
White	Male	8170	T1	N0	0	No radiation and/or cancer-directed surgery	Not recommended	Yes	14	10	No	No	No	No	Alive or dead of other cause	43	Alive	One primary only	53	6152582
White	Male	8170	TX	N0	0	No radiation and/or cancer-directed surgery	Not recommended	No/Unknown	999	10	Yes	No	No	No	Dead (attributable to this cancer dx)	6	Dead	One primary only	60	6152596
White	Male	8170	T1	N0	0	No radiation and/or cancer-directed surgery	Not recommended	Yes	19	10	No	No	No	No	Alive or dead of other cause	48	Alive	One primary only	63	6152637
White	Male	8170	T3a	N0	0	No radiation and/or cancer-directed surgery	Not recommended	Yes	85	10	No	No	No	No	Dead (attributable to this cancer dx)	3	Dead	One primary only	81	6152674
Other (American Indian/AK Native, Asian/Pacific Islander)	Male	8170	T1	N0	0	No radiation and/or cancer-directed surgery	Not recommended	No/Unknown	10	999	Yes	No	No	No	Dead (attributable to this cancer dx)	0	Dead	One primary only	65	6152790
White	Male	8170	T3b	N0	0	No radiation and/or cancer-directed surgery	Not recommended	Yes	84	10	No	No	No	No	Alive or dead of other cause	6	Dead	One primary only	64	6152934
White	Female	8170	T1	N0	0	No radiation and/or cancer-directed surgery	Recommended but not performed, patient refused	No/Unknown	28	10	No	No	No	No	Alive or dead of other cause	21	Dead	One primary only	53	6152940
White	Male	8170	TX	N0	0	No radiation and/or cancer-directed surgery	Not recommended	No/Unknown	999	10	No	No	No	No	Alive or dead of other cause	1	Dead	One primary only	58	6152943
White	Male	8170	T1	N1	0	No radiation and/or cancer-directed surgery	Not recommended	No/Unknown	130	999	No	No	No	No	Dead (attributable to this cancer dx)	5	Dead	One primary only	58	6152956
Other (American Indian/AK Native, Asian/Pacific Islander)	Male	8170	TX	N0	0	No radiation and/or cancer-directed surgery	Not recommended	No/Unknown	999	10	No	No	No	No	Dead (attributable to this cancer dx)	0	Dead	One primary only	71	6153121
White	Male	8170	T1	N0	0	No radiation and/or cancer-directed surgery	Not recommended	Yes	23	10	No	No	No	No	Alive or dead of other cause	16	Dead	One primary only	59	6153204
Other (American Indian/AK Native, Asian/Pacific Islander)	Female	8170	T2	N0	15	No radiation and/or cancer-directed surgery	Surgery performed	Yes	29	10	No	No	No	No	Dead (attributable to this cancer dx)	20	Dead	One primary only	61	6153352
White	Female	8170	T2	NX	0	No radiation and/or cancer-directed surgery	Not recommended	No/Unknown	48	999	No	No	No	No	Dead (attributable to this cancer dx)	0	Dead	One primary only	70	6153405
White	Male	8170	T1	N0	0	No radiation and/or cancer-directed surgery	Not recommended	No/Unknown	14	10	No	No	No	No	Alive or dead of other cause	10	Dead	One primary only	61	6153522
Other (American Indian/AK Native, Asian/Pacific Islander)	Female	8170	T1	NX	0	No radiation and/or cancer-directed surgery	Not recommended	No/Unknown	999	998	No	No	No	No	Dead (attributable to this cancer dx)	4	Dead	One primary only	52	6153678
Other (American Indian/AK Native, Asian/Pacific Islander)	Male	8170	T1	N0	16	No radiation and/or cancer-directed surgery	Surgery performed	No/Unknown	20	20	No	No	No	No	Dead (attributable to this cancer dx)	36	Dead	One primary only	65	6153858
White	Male	8170	T1	N0	0	No radiation and/or cancer-directed surgery	Not recommended	No/Unknown	15	20	No	No	No	No	Dead (attributable to this cancer dx)	23	Dead	One primary only	55	6154037
White	Male	8170	T1	N0	17	No radiation and/or cancer-directed surgery	Surgery performed	No/Unknown	20	10	No	No	No	No	Dead (attributable to this cancer dx)	3	Dead	One primary only	71	6154079
Other (American Indian/AK Native, Asian/Pacific Islander)	Male	8170	TX	N0	0	No radiation and/or cancer-directed surgery	Not recommended	No/Unknown	999	10	No	No	No	No	Alive or dead of other cause	4	Dead	One primary only	61	6154176
White	Male	8170	T3a	N0	10	No radiation and/or cancer-directed surgery	Surgery performed	No/Unknown	70	10	No	No	No	No	Alive or dead of other cause	35	Alive	One primary only	57	6154180
Black	Male	8170	T1	N0	0	No radiation and/or cancer-directed surgery	Not recommended	No/Unknown	16	10	No	No	No	No	Alive or dead of other cause	34	Alive	One primary only	70	6154183
White	Male	8170	TX	N1	0	No radiation and/or cancer-directed surgery	Not recommended	No/Unknown	999	10	No	No	No	Yes	Dead (attributable to this cancer dx)	0	Dead	One primary only	76	6154207
Other (American Indian/AK Native, Asian/Pacific Islander)	Male	8170	T1	N0	61	No radiation and/or cancer-directed surgery	Surgery performed	No/Unknown	35	20	No	No	No	No	Alive or dead of other cause	38	Alive	One primary only	56	6154322
Other (American Indian/AK Native, Asian/Pacific Islander)	Female	8170	T3a	N0	0	No radiation and/or cancer-directed surgery	Not recommended	No/Unknown	80	10	No	No	No	No	Dead (attributable to this cancer dx)	0	Dead	One primary only	91	6154508
Other (American Indian/AK Native, Asian/Pacific Islander)	Male	8174	T1	N0	36	No radiation and/or cancer-directed surgery	Surgery performed	No/Unknown	135	20	No	No	No	No	Alive or dead of other cause	35	Alive	One primary only	66	6154811
White	Male	8170	T2	N0	0	No radiation and/or cancer-directed surgery	Not recommended	Yes	80	20	No	No	No	No	Alive or dead of other cause	36	Alive	One primary only	18	6155000
White	Male	8170	T2	N0	0	No radiation and/or cancer-directed surgery	Not recommended	Yes	17	20	No	No	No	No	Alive or dead of other cause	36	Alive	One primary only	68	6155002
White	Male	8170	T1	N0	0	No radiation and/or cancer-directed surgery	Not recommended	No/Unknown	85	10	No	No	No	Yes	Dead (attributable to this cancer dx)	4	Dead	One primary only	54	6155116
Other (American Indian/AK Native, Asian/Pacific Islander)	Female	8170	T2	N0	30	No radiation and/or cancer-directed surgery	Surgery performed	No/Unknown	90	10	No	No	No	No	Alive or dead of other cause	35	Alive	One primary only	64	6155305
Other (American Indian/AK Native, Asian/Pacific Islander)	Female	8170	T1	N0	0	No radiation and/or cancer-directed surgery	Not recommended	No/Unknown	35	999	No	No	No	No	Dead (attributable to this cancer dx)	1	Dead	One primary only	61	6155414
Black	Male	8170	T3b	N0	0	No radiation and/or cancer-directed surgery	Not recommended	Yes	38	10	No	No	No	No	Dead (attributable to this cancer dx)	11	Dead	One primary only	63	6155743
Black	Male	8170	T1	NX	0	No radiation and/or cancer-directed surgery	Not recommended	No/Unknown	71	10	No	No	No	No	Dead (attributable to this cancer dx)	11	Dead	One primary only	65	6155879
Black	Male	8170	T1	N0	0	No radiation and/or cancer-directed surgery	Not recommended	Yes	19	10	No	No	No	No	Alive or dead of other cause	19	Dead	1st of 2 or more primaries	61	6155932
Other (American Indian/AK Native, Asian/Pacific Islander)	Male	8170	T1	N0	0	No radiation and/or cancer-directed surgery	Recommended, unknown if performed	No/Unknown	16	999	No	No	No	No	Alive or dead of other cause	56	Alive	One primary only	44	6156091
Black	Male	8170	T1	N0	36	No radiation and/or cancer-directed surgery	Surgery performed	No/Unknown	67	10	No	No	No	No	Dead (attributable to this cancer dx)	37	Dead	One primary only	67	6156097
White	Male	8170	T1	N0	0	No radiation and/or cancer-directed surgery	Not recommended	Yes	43	10	No	No	No	No	Alive or dead of other cause	8	Dead	One primary only	56	6156099
Other (American Indian/AK Native, Asian/Pacific Islander)	Female	8170	T3b	N0	0	No radiation and/or cancer-directed surgery	Not recommended	Yes	60	20	No	No	No	No	Dead (attributable to this cancer dx)	16	Dead	One primary only	77	6156106
White	Male	8170	T1	N0	61	No radiation and/or cancer-directed surgery	Surgery performed	No/Unknown	47	20	No	No	No	No	Alive or dead of other cause	35	Alive	1st of 2 or more primaries	61	6156110
Other (American Indian/AK Native, Asian/Pacific Islander)	Male	8170	T1	N0	26	No radiation and/or cancer-directed surgery	Surgery performed	No/Unknown	65	10	No	No	No	No	Alive or dead of other cause	34	Alive	One primary only	59	6156591
White	Male	8170	T1	N0	0	No radiation and/or cancer-directed surgery	Not recommended	No/Unknown	16	10	No	No	No	No	Dead (attributable to this cancer dx)	25	Dead	One primary only	52	6156593
Other (American Indian/AK Native, Asian/Pacific Islander)	Male	8170	T1	N0	10	No radiation and/or cancer-directed surgery	Surgery performed	No/Unknown	46	20	No	No	No	No	Dead (attributable to this cancer dx)	24	Dead	One primary only	63	6156604
Black	Male	8170	T1	N0	16	No radiation and/or cancer-directed surgery	Surgery performed	No/Unknown	16	10	No	No	No	No	Dead (attributable to this cancer dx)	27	Dead	1st of 2 or more primaries	58	6156606
White	Male	8170	TX	NX	0	No radiation and/or cancer-directed surgery	Not recommended	No/Unknown	999	999	No	No	No	No	Dead (attributable to this cancer dx)	1	Dead	One primary only	65	6156828
Other (American Indian/AK Native, Asian/Pacific Islander)	Male	8170	T1	N0	0	No radiation and/or cancer-directed surgery	Not recommended	No/Unknown	999	10	No	No	No	Yes	Dead (attributable to this cancer dx)	0	Dead	One primary only	54	6157000
White	Male	8170	T1	N0	16	No radiation and/or cancer-directed surgery	Surgery performed	Yes	47	10	No	No	No	No	Alive or dead of other cause	39	Alive	One primary only	55	6157110
White	Male	8170	T1	N0	61	No radiation and/or cancer-directed surgery	Surgery performed	No/Unknown	14	998	No	No	No	No	Dead (attributable to this cancer dx)	0	Dead	One primary only	59	6157612
White	Male	8170	T1	N0	0	No radiation and/or cancer-directed surgery	Not recommended	No/Unknown	33	999	Yes	No	No	No	Dead (attributable to this cancer dx)	8	Dead	One primary only	58	6157670
Other (American Indian/AK Native, Asian/Pacific Islander)	Male	8170	T3b	N0	0	No radiation and/or cancer-directed surgery	Not recommended	Yes	999	10	No	No	No	Yes	Alive or dead of other cause	29	Alive	One primary only	38	6157717
White	Male	8170	T2	N0	37	No radiation and/or cancer-directed surgery	Surgery performed	No/Unknown	49	10	No	No	No	No	Alive or dead of other cause	34	Alive	One primary only	24	6157738
White	Male	8170	T1	N0	0	No radiation and/or cancer-directed surgery	Not recommended	No/Unknown	11	20	No	No	No	No	Alive or dead of other cause	35	Alive	One primary only	62	6157749
Other (American Indian/AK Native, Asian/Pacific Islander)	Female	8170	T1	N0	30	No radiation and/or cancer-directed surgery	Surgery performed	No/Unknown	28	10	No	No	No	No	Alive or dead of other cause	35	Alive	One primary only	79	6157798
White	Male	8170	T2	N0	0	No radiation and/or cancer-directed surgery	Not recommended	Yes	28	999	No	No	No	No	Alive or dead of other cause	37	Alive	1st of 2 or more primaries	56	6157810
White	Male	8170	T1	N0	0	No radiation and/or cancer-directed surgery	Not recommended	No/Unknown	18	10	No	No	No	No	Alive or dead of other cause	70	Alive	One primary only	57	6157922
Other (American Indian/AK Native, Asian/Pacific Islander)	Female	8170	T1	N0	0	No radiation and/or cancer-directed surgery	Not recommended	No/Unknown	62	20	No	No	No	No	Dead (attributable to this cancer dx)	0	Dead	One primary only	87	6157970
Black	Male	8170	T4	N0	0	No radiation and/or cancer-directed surgery	Not recommended	No/Unknown	999	10	No	No	No	Yes	Dead (attributable to this cancer dx)	1	Dead	One primary only	67	6158211
Other (American Indian/AK Native, Asian/Pacific Islander)	Male	8170	T3a	N0	0	No radiation and/or cancer-directed surgery	Not recommended	Yes	80	10	No	No	No	No	Dead (attributable to this cancer dx)	27	Dead	One primary only	66	6158297
White	Male	8170	T3a	N0	0	No radiation and/or cancer-directed surgery	Not recommended	No/Unknown	91	10	No	No	No	No	Dead (attributable to this cancer dx)	2	Dead	One primary only	84	6158397
Other (American Indian/AK Native, Asian/Pacific Islander)	Male	8170	T3a	N0	0	No radiation and/or cancer-directed surgery	Not recommended	Yes	175	10	No	No	No	No	Dead (attributable to this cancer dx)	7	Dead	One primary only	66	6159213
White	Male	8170	T1	N0	16	No radiation and/or cancer-directed surgery	Surgery performed	No/Unknown	20	10	No	No	No	No	Alive or dead of other cause	19	Dead	One primary only	47	6159501
White	Male	8170	T1	N0	26	No radiation and/or cancer-directed surgery	Surgery performed	No/Unknown	30	10	No	No	No	No	Alive or dead of other cause	37	Alive	One primary only	81	6159584
White	Male	8170	T1	N0	0	No radiation and/or cancer-directed surgery	Not recommended	Yes	34	10	No	No	No	No	Alive or dead of other cause	12	Alive	One primary only	67	6159586
White	Female	8170	TX	NX	0	No radiation and/or cancer-directed surgery	Not recommended	No/Unknown	159	998	No	No	No	Yes	Dead (attributable to this cancer dx)	0	Dead	One primary only	85	6159668
Other (American Indian/AK Native, Asian/Pacific Islander)	Male	8170	T1	N0	0	No radiation and/or cancer-directed surgery	Not recommended	Yes	67	20	No	No	No	No	Alive or dead of other cause	19	Dead	One primary only	91	6159752
Other (American Indian/AK Native, Asian/Pacific Islander)	Female	8170	TX	N0	0	No radiation and/or cancer-directed surgery	Not recommended	Yes	128	10	No	No	No	No	Dead (attributable to this cancer dx)	2	Dead	One primary only	72	6159835
Other (American Indian/AK Native, Asian/Pacific Islander)	Female	8170	T2	N0	0	No radiation and/or cancer-directed surgery	Not recommended	Yes	16	10	No	No	No	No	Alive or dead of other cause	42	Alive	One primary only	46	6159940
White	Male	8170	T3a	N0	0	No radiation and/or cancer-directed surgery	Not recommended	No/Unknown	989	10	No	No	No	No	Dead (attributable to this cancer dx)	1	Dead	One primary only	72	6160088
Other (American Indian/AK Native, Asian/Pacific Islander)	Male	8170	T3b	N0	0	No radiation and/or cancer-directed surgery	Not recommended	No/Unknown	80	10	No	No	No	No	Alive or dead of other cause	0	Dead	One primary only	49	6160180
Other (American Indian/AK Native, Asian/Pacific Islander)	Male	8174	T1	N0	0	No radiation and/or cancer-directed surgery	Not recommended	Yes	49	20	No	No	No	No	Alive or dead of other cause	34	Alive	One primary only	54	6160214
White	Male	8170	T1	N0	23	No radiation and/or cancer-directed surgery	Surgery performed	No/Unknown	12	10	No	No	No	No	Alive or dead of other cause	33	Alive	One primary only	59	6160384
Other (American Indian/AK Native, Asian/Pacific Islander)	Male	8170	T1	N0	16	No radiation and/or cancer-directed surgery	Surgery performed	Yes	23	20	No	No	No	No	Alive or dead of other cause	34	Alive	One primary only	77	6160386
White	Male	8170	T2	N0	16	No radiation and/or cancer-directed surgery	Surgery performed	No/Unknown	22	10	No	No	No	No	Dead (attributable to this cancer dx)	1	Dead	One primary only	61	6160730
White	Male	8170	T1	N0	0	No radiation and/or cancer-directed surgery	Not recommended	No/Unknown	28	10	No	No	No	No	Alive or dead of other cause	9	Dead	One primary only	55	6160757
White	Male	8170	T1	N0	15	No radiation and/or cancer-directed surgery	Surgery performed	No/Unknown	12	998	No	No	No	No	Alive or dead of other cause	14	Dead	One primary only	53	6160764
White	Male	8170	T1	N0	16	No radiation and/or cancer-directed surgery	Surgery performed	No/Unknown	9	10	No	No	No	No	Dead (attributable to this cancer dx)	14	Dead	One primary only	54	6160765
White	Female	8170	T1	N0	0	No radiation and/or cancer-directed surgery	Not recommended	Yes	29	10	No	No	No	No	Dead (attributable to this cancer dx)	25	Dead	One primary only	53	6160769
Other (American Indian/AK Native, Asian/Pacific Islander)	Male	8170	T1	N0	36	No radiation and/or cancer-directed surgery	Surgery performed	Yes	100	10	No	No	No	No	Dead (attributable to this cancer dx)	3	Dead	One primary only	61	6160791
Other (American Indian/AK Native, Asian/Pacific Islander)	Male	8170	T1	N0	0	No radiation and/or cancer-directed surgery	Not recommended	Yes	19	20	No	No	No	No	Alive or dead of other cause	36	Alive	One primary only	74	6160792
White	Female	8170	T1	N0	16	No radiation and/or cancer-directed surgery	Surgery performed	No/Unknown	23	20	No	No	No	No	Alive or dead of other cause	34	Alive	One primary only	65	6160794
White	Male	8170	T2	N1	0	No radiation and/or cancer-directed surgery	Not recommended	Yes	15	10	No	No	No	No	Dead (attributable to this cancer dx)	0	Dead	One primary only	66	6160931
Other (American Indian/AK Native, Asian/Pacific Islander)	Male	8170	T1	N0	16	No radiation and/or cancer-directed surgery	Surgery performed	Yes	30	10	No	No	No	No	Alive or dead of other cause	46	Alive	One primary only	70	6160984
White	Male	8170	T3b	N1	0	No radiation and/or cancer-directed surgery	Not recommended	No/Unknown	150	10	No	No	No	No	Dead (attributable to this cancer dx)	6	Dead	One primary only	59	6160989
Other (American Indian/AK Native, Asian/Pacific Islander)	Male	8170	T3b	N0	0	No radiation and/or cancer-directed surgery	Not recommended	Yes	37	10	No	No	No	No	Dead (attributable to this cancer dx)	2	Dead	One primary only	59	6160990
White	Male	8170	T3a	N0	0	No radiation and/or cancer-directed surgery	Not recommended	No/Unknown	110	10	No	No	No	No	Dead (attributable to this cancer dx)	10	Dead	One primary only	57	6161101
White	Male	8170	T1	NX	0	No radiation and/or cancer-directed surgery	Not recommended	No/Unknown	33	10	No	No	No	No	Dead (attributable to this cancer dx)	13	Dead	One primary only	64	6161130
Other (American Indian/AK Native, Asian/Pacific Islander)	Female	8170	T1	N0	0	No radiation and/or cancer-directed surgery	Not recommended	No/Unknown	85	20	No	No	No	No	Alive or dead of other cause	0	Dead	One primary only	93	6161132
White	Male	8170	T1	N0	0	No radiation and/or cancer-directed surgery	Not recommended	No/Unknown	43	10	No	No	No	No	Dead (attributable to this cancer dx)	14	Dead	One primary only	62	6161284
Other (American Indian/AK Native, Asian/Pacific Islander)	Male	8170	T1	N0	0	No radiation and/or cancer-directed surgery	Not recommended	No/Unknown	83	10	No	No	No	No	Dead (attributable to this cancer dx)	3	Dead	1st of 2 or more primaries	91	6161309
Other (American Indian/AK Native, Asian/Pacific Islander)	Female	8170	TX	NX	0	No radiation and/or cancer-directed surgery	Not recommended	No/Unknown	105	20	No	No	No	No	Dead (attributable to this cancer dx)	15	Dead	One primary only	76	6161361
Other (American Indian/AK Native, Asian/Pacific Islander)	Male	8170	T1	N0	0	No radiation and/or cancer-directed surgery	Not recommended	Yes	143	10	No	No	No	No	Dead (attributable to this cancer dx)	3	Dead	One primary only	39	6161551
Other (American Indian/AK Native, Asian/Pacific Islander)	Male	8170	T1	N0	22	No radiation and/or cancer-directed surgery	Surgery performed	No/Unknown	21	10	No	No	No	No	Alive or dead of other cause	33	Alive	One primary only	55	6161557
Other (American Indian/AK Native, Asian/Pacific Islander)	Male	8170	T2	N0	0	No radiation and/or cancer-directed surgery	Not recommended	Yes	30	10	No	No	No	No	Alive or dead of other cause	33	Alive	One primary only	54	6161562
White	Male	8170	T3b	N0	0	No radiation and/or cancer-directed surgery	Not recommended	No/Unknown	999	10	Yes	No	Yes	No	Dead (attributable to this cancer dx)	2	Dead	One primary only	66	6161900
Black	Male	8170	T4	N0	0	No radiation and/or cancer-directed surgery	Not recommended	No/Unknown	160	10	No	No	No	No	Dead (attributable to this cancer dx)	0	Dead	One primary only	66	6161933
Black	Male	8170	T1	N0	0	No radiation and/or cancer-directed surgery	Not recommended	No/Unknown	999	20	No	No	No	No	Dead (attributable to this cancer dx)	0	Dead	One primary only	86	6162129
Other (American Indian/AK Native, Asian/Pacific Islander)	Male	8170	T3a	N0	0	No radiation and/or cancer-directed surgery	Not recommended, contraindicated due to other cond; autopsy only (1973-2002)	No/Unknown	120	998	Yes	No	No	No	Dead (attributable to this cancer dx)	1	Dead	One primary only	87	6162589
White	Male	8170	T2	N0	16	No radiation and/or cancer-directed surgery	Surgery performed	Yes	29	10	No	No	No	No	Alive or dead of other cause	35	Alive	One primary only	64	6162640
Other (American Indian/AK Native, Asian/Pacific Islander)	Female	8170	T1	N0	36	No radiation and/or cancer-directed surgery	Surgery performed	No/Unknown	29	20	No	No	No	No	Alive or dead of other cause	33	Alive	One primary only	79	6162641
Black	Male	8170	T2	N0	16	No radiation and/or cancer-directed surgery	Surgery performed	Yes	20	10	No	No	No	No	Alive or dead of other cause	49	Alive	One primary only	62	6162646
White	Male	8170	T1	N0	0	No radiation and/or cancer-directed surgery	Recommended but not performed, patient refused	No/Unknown	82	20	No	No	No	No	Dead (attributable to this cancer dx)	22	Dead	One primary only	92	6162679
Other (American Indian/AK Native, Asian/Pacific Islander)	Male	8170	T1	N0	36	No radiation and/or cancer-directed surgery	Surgery performed	No/Unknown	120	20	No	No	No	No	Alive or dead of other cause	35	Alive	One primary only	78	6162822
Black	Male	8170	T2	N0	0	No radiation and/or cancer-directed surgery	Not recommended	Yes	20	10	No	No	No	No	Alive or dead of other cause	32	Alive	One primary only	59	6163001
Other (American Indian/AK Native, Asian/Pacific Islander)	Male	8170	T4	N0	0	No radiation and/or cancer-directed surgery	Not recommended	No/Unknown	240	10	No	No	No	No	Dead (attributable to this cancer dx)	1	Dead	One primary only	50	6163010
Black	Male	8170	T3a	N0	0	No radiation and/or cancer-directed surgery	Not recommended	Yes	210	20	No	No	No	No	Dead (attributable to this cancer dx)	2	Dead	One primary only	61	6163346
White	Male	8170	T4	N0	0	No radiation and/or cancer-directed surgery	Not recommended	No/Unknown	150	10	No	No	No	No	Dead (attributable to this cancer dx)	6	Dead	One primary only	53	6163362
Other (American Indian/AK Native, Asian/Pacific Islander)	Male	8170	T2	N1	16	No radiation and/or cancer-directed surgery	Surgery performed	No/Unknown	21	20	No	No	No	No	Alive or dead of other cause	6	Dead	One primary only	67	6163445
Other (American Indian/AK Native, Asian/Pacific Islander)	Male	8170	T3b	N1	0	No radiation and/or cancer-directed surgery	Not recommended	No/Unknown	999	10	No	No	No	Yes	Dead (attributable to this cancer dx)	0	Dead	One primary only	62	6163457
Other (American Indian/AK Native, Asian/Pacific Islander)	Male	8170	TX	N0	0	No radiation and/or cancer-directed surgery	Not recommended	No/Unknown	999	10	No	No	No	No	Dead (attributable to this cancer dx)	12	Dead	One primary only	54	6163926
White	Female	8170	T1	N0	61	No radiation and/or cancer-directed surgery	Surgery performed	No/Unknown	35	10	No	No	No	No	Alive or dead of other cause	36	Alive	One primary only	66	6164053
White	Male	8170	TX	NX	0	No radiation and/or cancer-directed surgery	Not recommended	No/Unknown	999	998	No	No	No	No	Alive or dead of other cause	0	Dead	One primary only	57	6164128
White	Male	8170	T1	N0	16	No radiation and/or cancer-directed surgery	Surgery performed	Yes	27	20	No	No	No	No	Alive or dead of other cause	27	Dead	One primary only	59	6164139
White	Male	8170	T3a	N0	0	No radiation and/or cancer-directed surgery	Not recommended	Yes	100	10	No	No	No	No	Alive or dead of other cause	32	Alive	One primary only	72	6164159
White	Male	8170	T1	N0	0	No radiation and/or cancer-directed surgery	Not recommended	Yes	21	20	No	No	No	No	Alive or dead of other cause	32	Alive	One primary only	67	6164438
Other (American Indian/AK Native, Asian/Pacific Islander)	Male	8170	T3a	N0	16	No radiation and/or cancer-directed surgery	Surgery performed	Yes	73	10	No	No	No	No	Dead (attributable to this cancer dx)	25	Dead	One primary only	65	6164537
White	Male	8170	T3a	N0	0	No radiation and/or cancer-directed surgery	Not recommended	No/Unknown	70	10	No	No	No	No	Dead (attributable to this cancer dx)	0	Dead	One primary only	74	6164672
White	Male	8170	TX	N0	0	No radiation and/or cancer-directed surgery	Not recommended	No/Unknown	999	10	No	No	No	No	Dead (attributable to this cancer dx)	0	Dead	One primary only	60	6164796
White	Male	8170	T1	N0	0	No radiation and/or cancer-directed surgery	Not recommended	No/Unknown	27	20	No	No	No	No	Dead (attributable to this cancer dx)	32	Dead	One primary only	54	6164977
White	Male	8170	T1	N0	61	No radiation and/or cancer-directed surgery	Surgery performed	No/Unknown	21	10	No	No	No	No	Alive or dead of other cause	34	Alive	One primary only	61	6165274
Black	Male	8170	T1	N1	13	No radiation and/or cancer-directed surgery	Surgery performed	Yes	74	20	No	No	No	No	Alive or dead of other cause	37	Alive	One primary only	65	6165353
Other (American Indian/AK Native, Asian/Pacific Islander)	Male	8170	T1	N0	0	No radiation and/or cancer-directed surgery	Not recommended	No/Unknown	40	10	No	No	No	No	Alive or dead of other cause	8	Dead	One primary only	82	6165377
White	Female	8170	T2	N0	0	No radiation and/or cancer-directed surgery	Not recommended	Yes	14	20	No	No	No	No	Alive or dead of other cause	6	Dead	One primary only	64	6166035
Other (American Indian/AK Native, Asian/Pacific Islander)	Female	8170	T2	N0	23	No radiation and/or cancer-directed surgery	Surgery performed	No/Unknown	39	20	No	No	No	No	Dead (attributable to this cancer dx)	17	Dead	One primary only	59	6166056
Other (American Indian/AK Native, Asian/Pacific Islander)	Male	8170	T3a	N0	24	No radiation and/or cancer-directed surgery	Surgery performed	Yes	65	10	No	No	No	No	Alive or dead of other cause	33	Alive	One primary only	59	6166105
White	Male	8170	T1	N0	0	No radiation and/or cancer-directed surgery	Not recommended	Yes	999	999	No	No	No	No	Dead (attributable to this cancer dx)	1	Dead	One primary only	64	6166188
Black	Male	8170	T1	N0	0	No radiation and/or cancer-directed surgery	Not recommended	Yes	30	10	No	No	No	No	Dead (attributable to this cancer dx)	8	Dead	One primary only	60	6166481
Other (American Indian/AK Native, Asian/Pacific Islander)	Male	8170	T4	N1	0	No radiation and/or cancer-directed surgery	Not recommended	Yes	120	10	No	No	No	No	Alive or dead of other cause	31	Alive	One primary only	50	6166984
Other (American Indian/AK Native, Asian/Pacific Islander)	Male	8170	T4	N0	16	No radiation and/or cancer-directed surgery	Surgery performed	Yes	57	10	No	No	No	No	Alive or dead of other cause	19	Dead	One primary only	88	6167007
Other (American Indian/AK Native, Asian/Pacific Islander)	Male	8170	T1	N0	0	No radiation and/or cancer-directed surgery	Not recommended	Yes	224	10	No	No	No	No	Dead (attributable to this cancer dx)	6	Dead	One primary only	84	6167027
White	Male	8170	T2	N0	61	No radiation and/or cancer-directed surgery	Surgery performed	Yes	40	10	No	No	No	No	Alive or dead of other cause	32	Alive	One primary only	56	6167062
Other (American Indian/AK Native, Asian/Pacific Islander)	Male	8170	T3b	N0	0	No radiation and/or cancer-directed surgery	Not recommended	No/Unknown	150	10	No	No	No	No	Dead (attributable to this cancer dx)	0	Dead	One primary only	56	6167106
White	Male	8170	T1	N0	0	No radiation and/or cancer-directed surgery	Not recommended	Yes	21	20	No	No	No	No	Alive or dead of other cause	37	Alive	One primary only	62	6167135
Other (American Indian/AK Native, Asian/Pacific Islander)	Male	8170	T1	N0	21	No radiation and/or cancer-directed surgery	Surgery performed	No/Unknown	40	20	No	No	No	No	Alive or dead of other cause	33	Alive	One primary only	68	6167260
Other (American Indian/AK Native, Asian/Pacific Islander)	Male	8170	TX	N0	0	No radiation and/or cancer-directed surgery	Not recommended	No/Unknown	999	10	No	No	No	No	Dead (attributable to this cancer dx)	1	Dead	One primary only	76	6167398
White	Male	8170	TX	N0	0	No radiation and/or cancer-directed surgery	Not recommended	No/Unknown	999	10	Yes	No	No	No	Dead (attributable to this cancer dx)	0	Dead	One primary only	70	6167508
Other (American Indian/AK Native, Asian/Pacific Islander)	Male	8170	T2	N0	0	No radiation and/or cancer-directed surgery	Not recommended	Yes	36	10	No	No	No	No	Alive or dead of other cause	31	Alive	One primary only	68	6168010
White	Female	8170	T2	N0	0	No radiation and/or cancer-directed surgery	Not recommended	Yes	29	10	No	No	No	No	Dead (attributable to this cancer dx)	31	Dead	One primary only	68	6168180
Other (American Indian/AK Native, Asian/Pacific Islander)	Male	8170	T1	N0	0	No radiation and/or cancer-directed surgery	Not recommended	No/Unknown	45	10	No	No	No	No	Dead (attributable to this cancer dx)	5	Dead	One primary only	64	6168185
Other (American Indian/AK Native, Asian/Pacific Islander)	Male	8170	T1	N0	0	No radiation and/or cancer-directed surgery	Not recommended	Yes	34	10	No	No	No	No	Alive or dead of other cause	5	Dead	One primary only	57	6168309
White	Male	8170	T2	N0	16	No radiation and/or cancer-directed surgery	Surgery performed	No/Unknown	21	10	No	No	No	No	Alive or dead of other cause	31	Alive	One primary only	49	6168394
Other (American Indian/AK Native, Asian/Pacific Islander)	Male	8170	T1	N0	0	No radiation and/or cancer-directed surgery	Recommended, unknown if performed	Yes	23	10	No	No	No	No	Alive or dead of other cause	33	Alive	One primary only	57	6168626
Other (American Indian/AK Native, Asian/Pacific Islander)	Male	8170	T2	N0	0	No radiation and/or cancer-directed surgery	Not recommended	Yes	22	10	No	No	No	No	Alive or dead of other cause	30	Alive	One primary only	63	6168837
White	Male	8170	T1	N0	0	No radiation and/or cancer-directed surgery	Not recommended	Yes	50	10	No	No	No	No	Dead (attributable to this cancer dx)	18	Dead	One primary only	53	6168839
Black	Male	8170	T3b	N1	0	No radiation and/or cancer-directed surgery	Not recommended	No/Unknown	88	10	No	No	No	No	Dead (attributable to this cancer dx)	0	Dead	One primary only	82	6169013
White	Male	8170	T3a	N0	0	No radiation and/or cancer-directed surgery	Not recommended	Yes	200	20	No	No	No	No	Alive or dead of other cause	31	Alive	One primary only	56	6169214
White	Male	8170	T2	N0	0	No radiation and/or cancer-directed surgery	Not recommended	Yes	30	999	No	No	No	No	Dead (attributable to this cancer dx)	16	Dead	One primary only	74	6169347
White	Male	8170	T1	N0	16	No radiation and/or cancer-directed surgery	Surgery performed	No/Unknown	42	10	No	No	No	No	Alive or dead of other cause	30	Alive	One primary only	57	6169624
White	Male	8170	T4	N0	0	No radiation and/or cancer-directed surgery	Not recommended	No/Unknown	105	10	No	No	No	No	Alive or dead of other cause	4	Dead	One primary only	65	6169674
White	Male	8170	T4	NX	0	No radiation and/or cancer-directed surgery	Not recommended	No/Unknown	999	999	No	No	No	Yes	Dead (attributable to this cancer dx)	2	Dead	One primary only	51	6169808
White	Male	8170	T2	N0	0	No radiation and/or cancer-directed surgery	Not recommended	No/Unknown	26	20	No	No	No	No	Dead (attributable to this cancer dx)	46	Dead	One primary only	57	6170234
White	Male	8170	T3b	N0	16	No radiation and/or cancer-directed surgery	Surgery performed	No/Unknown	37	20	No	No	No	No	Dead (attributable to this cancer dx)	18	Dead	One primary only	64	6170273
White	Male	8170	T1	N0	0	No radiation and/or cancer-directed surgery	Not recommended	Yes	60	10	No	No	No	No	Dead (attributable to this cancer dx)	2	Dead	One primary only	69	6170617
White	Male	8170	T3b	N0	0	No radiation and/or cancer-directed surgery	Not recommended	No/Unknown	54	20	No	No	No	No	Dead (attributable to this cancer dx)	28	Dead	One primary only	68	6170725
Other (American Indian/AK Native, Asian/Pacific Islander)	Female	8170	T1	N0	0	No radiation and/or cancer-directed surgery	Not recommended	Yes	44	999	No	No	No	No	Dead (attributable to this cancer dx)	31	Dead	One primary only	71	6170756
White	Male	8170	T2	N0	0	No radiation and/or cancer-directed surgery	Not recommended	Yes	999	10	No	No	No	No	Dead (attributable to this cancer dx)	27	Dead	One primary only	76	6170778
Other (American Indian/AK Native, Asian/Pacific Islander)	Female	8170	TX	NX	0	No radiation and/or cancer-directed surgery	Not recommended	No/Unknown	999	10	No	No	No	No	Dead (attributable to this cancer dx)	0	Dead	One primary only	77	6170902
Other (American Indian/AK Native, Asian/Pacific Islander)	Male	8170	T1	N0	0	No radiation and/or cancer-directed surgery	Not recommended	Yes	999	10	No	No	No	No	Dead (attributable to this cancer dx)	4	Dead	One primary only	67	6170939
Other (American Indian/AK Native, Asian/Pacific Islander)	Female	8170	T1	N0	16	No radiation and/or cancer-directed surgery	Surgery performed	Yes	38	20	No	No	No	No	Alive or dead of other cause	33	Alive	One primary only	64	6170944
Other (American Indian/AK Native, Asian/Pacific Islander)	Male	8170	T1	N0	37	No radiation and/or cancer-directed surgery	Surgery performed	No/Unknown	30	20	No	No	No	No	Alive or dead of other cause	33	Alive	One primary only	72	6170969
Other (American Indian/AK Native, Asian/Pacific Islander)	Male	8170	T1	N0	0	No radiation and/or cancer-directed surgery	Not recommended	No/Unknown	19	20	No	No	No	No	Alive or dead of other cause	36	Alive	One primary only	73	6171175
Other (American Indian/AK Native, Asian/Pacific Islander)	Male	8170	T1	N0	36	No radiation and/or cancer-directed surgery	Surgery performed	No/Unknown	40	20	No	No	No	No	Alive or dead of other cause	32	Alive	One primary only	57	6171288
White	Male	8170	T1	N0	0	No radiation and/or cancer-directed surgery	Not recommended	Yes	50	10	Yes	No	No	No	Dead (attributable to this cancer dx)	2	Dead	One primary only	60	6171462
Other (American Indian/AK Native, Asian/Pacific Islander)	Male	8170	T1	N0	0	No radiation and/or cancer-directed surgery	Not recommended	Yes	14	10	No	No	No	No	Alive or dead of other cause	35	Alive	One primary only	69	6171712
Other (American Indian/AK Native, Asian/Pacific Islander)	Male	8170	T3a	N1	0	No radiation and/or cancer-directed surgery	Not recommended	Yes	140	10	No	No	No	Yes	Dead (attributable to this cancer dx)	1	Dead	One primary only	53	6171760
Other (American Indian/AK Native, Asian/Pacific Islander)	Male	8170	T1	N0	0	No radiation and/or cancer-directed surgery	Not recommended	Yes	46	10	No	No	No	No	Dead (attributable to this cancer dx)	9	Dead	One primary only	77	6171799
White	Male	8170	T3a	N1	0	No radiation and/or cancer-directed surgery	Not recommended	No/Unknown	56	10	No	No	No	No	Dead (attributable to this cancer dx)	3	Dead	One primary only	71	6171958
Other (American Indian/AK Native, Asian/Pacific Islander)	Male	8170	T3a	N0	0	No radiation and/or cancer-directed surgery	Not recommended	Yes	56	10	No	No	No	No	Dead (attributable to this cancer dx)	31	Dead	One primary only	60	6172027
White	Male	8170	T1	N0	0	No radiation and/or cancer-directed surgery	Not recommended	Yes	15	10	No	No	No	No	Alive or dead of other cause	31	Alive	One primary only	56	6172031
Black	Male	8170	T1	N0	26	No radiation and/or cancer-directed surgery	Surgery performed	No/Unknown	24	10	No	No	No	No	Alive or dead of other cause	12	Dead	One primary only	64	6172364
White	Male	8170	T1	N0	16	No radiation and/or cancer-directed surgery	Surgery performed	No/Unknown	17	10	No	No	No	No	Alive or dead of other cause	31	Alive	One primary only	66	6172377
Other (American Indian/AK Native, Asian/Pacific Islander)	Male	8170	T1	N0	16	No radiation and/or cancer-directed surgery	Surgery performed	No/Unknown	30	10	No	No	No	No	Alive or dead of other cause	31	Alive	One primary only	84	6172380
White	Male	8170	TX	N0	0	No radiation and/or cancer-directed surgery	Not recommended	No/Unknown	999	10	No	No	No	No	Dead (attributable to this cancer dx)	2	Dead	One primary only	54	6172563
Other (American Indian/AK Native, Asian/Pacific Islander)	Male	8170	T3b	N0	0	No radiation and/or cancer-directed surgery	Not recommended	No/Unknown	47	10	No	No	No	No	Dead (attributable to this cancer dx)	6	Dead	One primary only	64	6172843
Black	Male	8170	T2	N0	26	No radiation and/or cancer-directed surgery	Surgery performed	Yes	48	10	No	No	No	No	Dead (attributable to this cancer dx)	11	Dead	One primary only	51	6172980
White	Male	8170	T2	N0	0	No radiation and/or cancer-directed surgery	Not recommended	Yes	31	10	Yes	No	No	No	Dead (attributable to this cancer dx)	4	Dead	One primary only	67	6173501
Other (American Indian/AK Native, Asian/Pacific Islander)	Female	8170	T1	N0	0	No radiation and/or cancer-directed surgery	Not recommended	Yes	14	10	No	No	No	No	Alive or dead of other cause	30	Alive	One primary only	65	6173631
Other (American Indian/AK Native, Asian/Pacific Islander)	Male	8170	T1	N0	0	No radiation and/or cancer-directed surgery	Not recommended	Yes	46	999	No	No	No	No	Dead (attributable to this cancer dx)	6	Dead	One primary only	90	6173855
Other (American Indian/AK Native, Asian/Pacific Islander)	Male	8170	T1	N0	0	No radiation and/or cancer-directed surgery	Not recommended	No/Unknown	24	10	No	No	No	No	Alive or dead of other cause	14	Dead	One primary only	49	6173915
White	Female	8170	T1	N0	0	No radiation and/or cancer-directed surgery	Not recommended	Yes	35	20	No	No	No	No	Dead (attributable to this cancer dx)	25	Dead	One primary only	73	6173969
White	Female	8170	T1	N0	0	No radiation and/or cancer-directed surgery	Not recommended	No/Unknown	40	20	No	No	No	No	Alive or dead of other cause	21	Dead	One primary only	90	6174131
Other (American Indian/AK Native, Asian/Pacific Islander)	Female	8170	T1	N0	0	No radiation and/or cancer-directed surgery	Not recommended	No/Unknown	78	10	No	No	No	No	Dead (attributable to this cancer dx)	0	Dead	One primary only	80	6174160
White	Male	8170	T2	N0	0	No radiation and/or cancer-directed surgery	Not recommended	No/Unknown	18	10	No	No	No	No	Alive or dead of other cause	10	Dead	One primary only	66	6174315
Other (American Indian/AK Native, Asian/Pacific Islander)	Male	8170	T1	N0	0	No radiation and/or cancer-directed surgery	Not recommended	Yes	24	20	No	No	No	No	Alive or dead of other cause	31	Alive	One primary only	68	6174364
Other (American Indian/AK Native, Asian/Pacific Islander)	Male	8170	T1	N0	36	No radiation and/or cancer-directed surgery	Surgery performed	Yes	135	10	No	No	No	No	Alive or dead of other cause	29	Alive	One primary only	73	6174366
White	Female	8170	T1	N0	16	No radiation and/or cancer-directed surgery	Surgery performed	Yes	15	20	No	No	No	No	Alive or dead of other cause	21	Dead	One primary only	68	6174369
White	Male	8170	T3b	N0	0	No radiation and/or cancer-directed surgery	Not recommended	No/Unknown	155	10	No	No	No	No	Dead (attributable to this cancer dx)	5	Dead	One primary only	58	6174374
Black	Male	8170	T1	N0	0	No radiation and/or cancer-directed surgery	Not recommended	Yes	47	997	No	No	No	No	Dead (attributable to this cancer dx)	9	Dead	One primary only	81	6174729
White	Male	8170	T1	N0	21	No radiation and/or cancer-directed surgery	Surgery performed	No/Unknown	22	20	No	No	No	No	Alive or dead of other cause	28	Alive	1st of 2 or more primaries	67	6174955
Other (American Indian/AK Native, Asian/Pacific Islander)	Male	8170	T3a	N0	0	No radiation and/or cancer-directed surgery	Not recommended, contraindicated due to other cond; autopsy only (1973-2002)	Yes	89	10	No	No	No	No	Dead (attributable to this cancer dx)	25	Dead	One primary only	79	6175041
Other (American Indian/AK Native, Asian/Pacific Islander)	Female	8170	TX	NX	0	No radiation and/or cancer-directed surgery	Not recommended	Yes	999	999	No	No	No	No	Dead (attributable to this cancer dx)	4	Dead	One primary only	67	6175048
White	Male	8170	T2	N0	0	No radiation and/or cancer-directed surgery	Not recommended	Yes	49	10	No	No	No	No	Dead (attributable to this cancer dx)	13	Dead	One primary only	61	6175761
Other (American Indian/AK Native, Asian/Pacific Islander)	Male	8170	T3a	N0	0	No radiation and/or cancer-directed surgery	Not recommended	No/Unknown	55	10	No	No	No	No	Dead (attributable to this cancer dx)	2	Dead	One primary only	64	6175796
White	Male	8170	T1	N0	16	No radiation and/or cancer-directed surgery	Surgery performed	No/Unknown	1	10	No	No	No	No	Alive or dead of other cause	33	Alive	One primary only	44	6175797
White	Female	8170	T1	N0	16	No radiation and/or cancer-directed surgery	Surgery performed	No/Unknown	23	20	No	No	No	No	Alive or dead of other cause	30	Alive	One primary only	51	6175800
White	Male	8170	T2	N1	0	No radiation and/or cancer-directed surgery	Not recommended	Yes	48	10	No	No	No	No	Dead (attributable to this cancer dx)	6	Dead	One primary only	74	6175940
White	Female	8170	T3a	N0	0	No radiation and/or cancer-directed surgery	Not recommended	No/Unknown	128	10	No	No	No	No	Dead (attributable to this cancer dx)	4	Dead	One primary only	60	6176213
White	Female	8170	T1	N0	0	No radiation and/or cancer-directed surgery	Not recommended	Yes	37	10	No	No	No	No	Dead (attributable to this cancer dx)	8	Dead	One primary only	65	6176281
White	Male	8170	T3a	N0	0	No radiation and/or cancer-directed surgery	Not recommended	Yes	121	10	No	No	No	No	Alive or dead of other cause	29	Alive	One primary only	55	6176663
Other (American Indian/AK Native, Asian/Pacific Islander)	Female	8170	T3a	N0	0	No radiation and/or cancer-directed surgery	Not recommended	No/Unknown	65	10	No	No	No	No	Dead (attributable to this cancer dx)	3	Dead	One primary only	85	6176821
Other (American Indian/AK Native, Asian/Pacific Islander)	Male	8170	T1	N0	16	No radiation and/or cancer-directed surgery	Surgery performed	No/Unknown	17	10	No	No	No	No	Alive or dead of other cause	31	Alive	1st of 2 or more primaries	63	6176971
White	Female	8170	TX	N0	0	No radiation and/or cancer-directed surgery	Not recommended	Yes	999	999	No	No	No	No	Dead (attributable to this cancer dx)	3	Dead	One primary only	54	6177101
White	Male	8170	T1	N0	0	No radiation and/or cancer-directed surgery	Not recommended	No/Unknown	38	10	No	No	No	No	Alive or dead of other cause	1	Dead	One primary only	60	6177226
Other (American Indian/AK Native, Asian/Pacific Islander)	Female	8170	T2	N0	0	No radiation and/or cancer-directed surgery	Recommended, unknown if performed	Yes	19	20	No	No	No	No	Alive or dead of other cause	32	Alive	One primary only	42	6177367
White	Male	8170	T3b	N0	30	No radiation and/or cancer-directed surgery	Surgery performed	No/Unknown	85	20	No	No	No	No	Dead (attributable to this cancer dx)	3	Dead	One primary only	76	6177621
Other (American Indian/AK Native, Asian/Pacific Islander)	Female	8170	T1	N0	37	No radiation and/or cancer-directed surgery	Surgery performed	No/Unknown	28	10	No	No	No	No	Alive or dead of other cause	34	Alive	One primary only	77	6177936
White	Male	8170	T1	N1	0	No radiation and/or cancer-directed surgery	Not recommended	No/Unknown	52	10	No	No	No	No	Dead (attributable to this cancer dx)	0	Dead	One primary only	63	6177957
White	Male	8170	T2	N0	0	No radiation and/or cancer-directed surgery	Not recommended	Yes	39	10	No	No	No	No	Dead (attributable to this cancer dx)	27	Dead	One primary only	64	6177985
Other (American Indian/AK Native, Asian/Pacific Islander)	Female	8170	T3a	N0	0	No radiation and/or cancer-directed surgery	Not recommended	Yes	62	999	No	No	No	No	Alive or dead of other cause	14	Alive	One primary only	64	6178352
Other (American Indian/AK Native, Asian/Pacific Islander)	Female	8170	T1	N0	0	No radiation and/or cancer-directed surgery	Not recommended	Yes	90	20	No	No	No	No	Dead (attributable to this cancer dx)	8	Dead	One primary only	75	6178455
White	Male	8170	T1	N0	0	No radiation and/or cancer-directed surgery	Not recommended	Yes	20	10	No	No	No	No	Alive or dead of other cause	28	Alive	One primary only	57	6178464
White	Male	8170	T1	N0	0	No radiation and/or cancer-directed surgery	Not recommended	Yes	21	20	No	No	No	No	Dead (attributable to this cancer dx)	17	Dead	One primary only	60	6178466
White	Male	8170	T1	N0	16	No radiation and/or cancer-directed surgery	Surgery performed	No/Unknown	19	10	No	No	No	No	Alive or dead of other cause	33	Alive	One primary only	65	6178745
Other (American Indian/AK Native, Asian/Pacific Islander)	Male	8170	T1	N0	23	No radiation and/or cancer-directed surgery	Surgery performed	No/Unknown	30	20	No	No	No	No	Alive or dead of other cause	29	Alive	One primary only	54	6178828
White	Male	8170	T1	N0	0	No radiation and/or cancer-directed surgery	Not recommended	No/Unknown	77	10	No	No	No	No	Dead (attributable to this cancer dx)	0	Dead	One primary only	84	6179433
White	Male	8170	T3b	N0	0	No radiation and/or cancer-directed surgery	Not recommended	No/Unknown	52	10	No	No	No	No	Alive or dead of other cause	2	Alive	One primary only	46	6179494
White	Male	8170	T3a	N0	0	No radiation and/or cancer-directed surgery	Not recommended	No/Unknown	61	20	No	No	No	No	Dead (attributable to this cancer dx)	1	Dead	One primary only	61	6179652
Other (American Indian/AK Native, Asian/Pacific Islander)	Male	8170	T1	N0	36	No radiation and/or cancer-directed surgery	Surgery performed	No/Unknown	30	20	No	No	No	No	Alive or dead of other cause	29	Alive	1st of 2 or more primaries	65	6179832
White	Female	8170	T3b	N0	0	No radiation and/or cancer-directed surgery	Not recommended	Yes	48	10	No	No	No	No	Alive or dead of other cause	6	Alive	One primary only	71	6180115
White	Female	8170	T1	N0	16	No radiation and/or cancer-directed surgery	Surgery performed	Yes	24	10	No	No	No	No	Dead (attributable to this cancer dx)	11	Dead	One primary only	66	6180174
Other (American Indian/AK Native, Asian/Pacific Islander)	Female	8170	T1	N0	0	No radiation and/or cancer-directed surgery	Not recommended	Yes	57	10	No	No	No	No	Alive or dead of other cause	26	Alive	One primary only	70	6180299
White	Female	8170	T1	N0	0	No radiation and/or cancer-directed surgery	Not recommended	Yes	24	20	No	No	No	No	Dead (attributable to this cancer dx)	13	Dead	One primary only	63	6180375
White	Male	8170	T4	N1	0	No radiation and/or cancer-directed surgery	Not recommended	No/Unknown	999	10	No	No	No	No	Dead (attributable to this cancer dx)	1	Dead	One primary only	71	6180604
Black	Female	8170	T3a	N0	0	No radiation and/or cancer-directed surgery	Not recommended	Yes	60	20	No	No	No	No	Dead (attributable to this cancer dx)	22	Dead	One primary only	70	6180706
White	Male	8170	T2	N0	22	No radiation and/or cancer-directed surgery	Surgery performed	No/Unknown	34	20	No	No	No	No	Alive or dead of other cause	29	Alive	One primary only	60	6180916
White	Male	8170	T2	N0	0	No radiation and/or cancer-directed surgery	Not recommended	Yes	34	20	No	No	No	No	Alive or dead of other cause	28	Alive	One primary only	58	6180996
White	Male	8170	T2	N0	0	No radiation and/or cancer-directed surgery	Not recommended	Yes	60	10	No	No	No	No	Alive or dead of other cause	6	Alive	One primary only	76	6181115
Black	Male	8170	T3a	N1	0	No radiation and/or cancer-directed surgery	Not recommended	No/Unknown	101	10	No	Yes	No	Yes	Dead (attributable to this cancer dx)	1	Dead	1st of 2 or more primaries	63	6181185
Other (American Indian/AK Native, Asian/Pacific Islander)	Male	8170	TX	NX	0	No radiation and/or cancer-directed surgery	Not recommended	Yes	999	20	No	No	No	No	Dead (attributable to this cancer dx)	3	Dead	One primary only	69	6181337
Other (American Indian/AK Native, Asian/Pacific Islander)	Male	8170	T2	N0	16	No radiation and/or cancer-directed surgery	Surgery performed	Yes	31	10	No	No	No	No	Dead (attributable to this cancer dx)	9	Dead	One primary only	65	6181495
Other (American Indian/AK Native, Asian/Pacific Islander)	Male	8170	T1	N0	16	No radiation and/or cancer-directed surgery	Surgery performed	No/Unknown	21	10	No	No	No	No	Alive or dead of other cause	27	Alive	One primary only	56	6181618
Black	Male	8170	T1	N0	0	No radiation and/or cancer-directed surgery	Not recommended	Yes	21	20	No	No	No	No	Alive or dead of other cause	32	Alive	One primary only	69	6181750
Other (American Indian/AK Native, Asian/Pacific Islander)	Male	8170	T1	N0	0	No radiation and/or cancer-directed surgery	Not recommended	No/Unknown	30	10	No	No	No	No	Dead (attributable to this cancer dx)	6	Dead	One primary only	80	6181890
White	Male	8170	T1	N1	0	No radiation and/or cancer-directed surgery	Not recommended	No/Unknown	19	999	No	No	No	No	Alive or dead of other cause	0	Alive	One primary only	56	6182095
Black	Male	8170	T1	N0	0	No radiation and/or cancer-directed surgery	Not recommended	No/Unknown	115	10	No	No	No	No	Dead (attributable to this cancer dx)	0	Dead	One primary only	53	6182193
Other (American Indian/AK Native, Asian/Pacific Islander)	Male	8170	T2	N0	0	No radiation and/or cancer-directed surgery	Not recommended	Yes	31	20	No	No	No	No	Alive or dead of other cause	32	Alive	One primary only	56	6182421
White	Male	8170	T2	N0	22	No radiation and/or cancer-directed surgery	Surgery performed	No/Unknown	41	10	No	No	No	No	Alive or dead of other cause	28	Alive	One primary only	59	6182519
Black	Male	8170	T2	N0	0	No radiation and/or cancer-directed surgery	Recommended, unknown if performed	Yes	35	10	No	No	No	No	Alive or dead of other cause	28	Alive	One primary only	62	6182646
Other (American Indian/AK Native, Asian/Pacific Islander)	Male	8170	T3a	N0	0	No radiation and/or cancer-directed surgery	Not recommended	No/Unknown	66	10	No	No	No	No	Dead (attributable to this cancer dx)	1	Dead	One primary only	64	6182715
Other (American Indian/AK Native, Asian/Pacific Islander)	Male	8170	T1	N0	0	No radiation and/or cancer-directed surgery	Not recommended	No/Unknown	49	20	No	No	No	No	Dead (attributable to this cancer dx)	12	Dead	One primary only	67	6182838
Other (American Indian/AK Native, Asian/Pacific Islander)	Male	8170	TX	NX	0	No radiation and/or cancer-directed surgery	Not recommended	No/Unknown	999	999	No	No	No	Yes	Dead (attributable to this cancer dx)	1	Dead	One primary only	66	6182883
White	Female	8170	T1	N0	16	No radiation and/or cancer-directed surgery	Surgery performed	No/Unknown	15	20	No	No	No	No	Alive or dead of other cause	28	Alive	One primary only	65	6183746
Other (American Indian/AK Native, Asian/Pacific Islander)	Female	8170	T1	N0	0	No radiation and/or cancer-directed surgery	Not recommended	Yes	30	10	No	No	No	No	Alive or dead of other cause	33	Alive	One primary only	73	6183768
Other (American Indian/AK Native, Asian/Pacific Islander)	Female	8170	T3a	N0	16	No radiation and/or cancer-directed surgery	Surgery performed	Yes	135	10	No	No	No	No	Dead (attributable to this cancer dx)	15	Dead	One primary only	70	6184185
White	Male	8170	T2	N0	0	No radiation and/or cancer-directed surgery	Not recommended	Yes	19	20	No	No	No	No	Alive or dead of other cause	6	Dead	One primary only	78	6184282
White	Female	8170	TX	N0	0	No radiation and/or cancer-directed surgery	Not recommended	No/Unknown	39	20	No	No	No	No	Alive or dead of other cause	28	Alive	One primary only	63	6184464
White	Female	8170	T1	N0	16	No radiation and/or cancer-directed surgery	Surgery performed	Yes	25	10	No	No	No	No	Alive or dead of other cause	29	Alive	One primary only	55	6184469
Other (American Indian/AK Native, Asian/Pacific Islander)	Male	8170	T2	N0	0	No radiation and/or cancer-directed surgery	Not recommended	Yes	26	10	No	No	No	No	Alive or dead of other cause	26	Alive	One primary only	65	6184472
Other (American Indian/AK Native, Asian/Pacific Islander)	Female	8170	T1	N0	0	No radiation and/or cancer-directed surgery	Not recommended	Yes	23	10	No	No	No	No	Alive or dead of other cause	2	Alive	One primary only	64	6184685
Black	Male	8170	T1	N1	0	No radiation and/or cancer-directed surgery	Not recommended	Yes	150	10	No	No	No	No	Dead (attributable to this cancer dx)	3	Dead	One primary only	60	6184729
Black	Male	8170	T1	N0	14	No radiation and/or cancer-directed surgery	Surgery performed	No/Unknown	27	20	No	No	No	No	Alive or dead of other cause	26	Alive	One primary only	57	6184763
Other (American Indian/AK Native, Asian/Pacific Islander)	Male	8170	T3a	N0	0	No radiation and/or cancer-directed surgery	Not recommended	Yes	64	10	No	No	No	No	Alive or dead of other cause	27	Alive	One primary only	71	6184853
White	Male	8170	T2	N0	0	No radiation and/or cancer-directed surgery	Not recommended	No/Unknown	15	10	No	No	No	No	Alive or dead of other cause	25	Alive	One primary only	62	6184854
White	Female	8170	T4	NX	0	No radiation and/or cancer-directed surgery	Not recommended	No/Unknown	70	10	No	No	No	No	Dead (attributable to this cancer dx)	4	Dead	One primary only	85	6184925
White	Male	8170	T1	N0	0	No radiation and/or cancer-directed surgery	Not recommended	Yes	22	20	No	No	No	No	Dead (attributable to this cancer dx)	30	Dead	One primary only	51	6185035
Other (American Indian/AK Native, Asian/Pacific Islander)	Male	8170	T1	N0	0	No radiation and/or cancer-directed surgery	Not recommended	Yes	49	20	No	No	No	No	Alive or dead of other cause	32	Alive	One primary only	61	6185038
Other (American Indian/AK Native, Asian/Pacific Islander)	Male	8170	T2	N0	0	No radiation and/or cancer-directed surgery	Not recommended	Yes	22	20	No	No	No	No	Alive or dead of other cause	30	Alive	One primary only	62	6185050
Black	Female	8170	T2	N0	16	No radiation and/or cancer-directed surgery	Surgery performed	No/Unknown	18	998	No	No	No	No	Alive or dead of other cause	26	Alive	One primary only	53	6185084
White	Female	8170	T1	N0	0	No radiation and/or cancer-directed surgery	Not recommended	No/Unknown	32	10	No	No	No	No	Dead (attributable to this cancer dx)	9	Dead	One primary only	58	6185120
Black	Male	8170	T3a	N0	0	No radiation and/or cancer-directed surgery	Not recommended	No/Unknown	54	10	No	No	No	No	Alive or dead of other cause	2	Dead	One primary only	70	6185241
Other (American Indian/AK Native, Asian/Pacific Islander)	Male	8170	T1	N0	0	No radiation and/or cancer-directed surgery	Not recommended	No/Unknown	70	10	No	No	No	No	Dead (attributable to this cancer dx)	1	Dead	One primary only	83	6185619
White	Female	8170	T2	N0	0	No radiation and/or cancer-directed surgery	Recommended, unknown if performed	Yes	20	10	No	No	No	No	Dead (attributable to this cancer dx)	21	Dead	One primary only	66	6185672
Black	Male	8170	T2	N0	0	No radiation and/or cancer-directed surgery	Not recommended	No/Unknown	35	10	No	No	No	No	Dead (attributable to this cancer dx)	4	Dead	One primary only	60	6185683
White	Male	8170	T1	N0	0	No radiation and/or cancer-directed surgery	Not recommended	Yes	45	10	No	No	No	No	Alive or dead of other cause	28	Alive	One primary only	60	6185685
White	Female	8170	T1	N0	16	No radiation and/or cancer-directed surgery	Surgery performed	No/Unknown	19	10	No	No	No	No	Alive or dead of other cause	30	Alive	One primary only	58	6185934
Other (American Indian/AK Native, Asian/Pacific Islander)	Male	8170	T1	N0	0	No radiation and/or cancer-directed surgery	Not recommended	Yes	18	20	No	No	No	No	Alive or dead of other cause	29	Alive	One primary only	70	6185939
White	Male	8170	T1	N0	0	No radiation and/or cancer-directed surgery	Not recommended	Yes	24	10	No	No	No	No	Dead (attributable to this cancer dx)	6	Dead	One primary only	45	6186001
White	Male	8170	T3b	N0	0	No radiation and/or cancer-directed surgery	Not recommended	No/Unknown	88	10	No	No	No	No	Dead (attributable to this cancer dx)	6	Dead	One primary only	56	6186071
Other (American Indian/AK Native, Asian/Pacific Islander)	Male	8170	T3a	N0	0	No radiation and/or cancer-directed surgery	Not recommended	No/Unknown	100	10	No	No	No	No	Dead (attributable to this cancer dx)	3	Dead	One primary only	75	6186101
Black	Female	8170	T1	N0	23	No radiation and/or cancer-directed surgery	Surgery performed	Yes	74	10	No	No	No	No	Dead (attributable to this cancer dx)	9	Dead	One primary only	49	6186228
White	Male	8170	T2	N0	0	No radiation and/or cancer-directed surgery	Not recommended	Yes	28	20	No	No	No	No	Dead (attributable to this cancer dx)	13	Dead	One primary only	60	6186262
Other (American Indian/AK Native, Asian/Pacific Islander)	Male	8170	T1	N0	16	No radiation and/or cancer-directed surgery	Surgery performed	Yes	28	20	No	No	No	No	Alive or dead of other cause	26	Alive	One primary only	75	6186327
Other (American Indian/AK Native, Asian/Pacific Islander)	Male	8170	T3a	N0	0	No radiation and/or cancer-directed surgery	Not recommended	No/Unknown	77	10	No	No	No	No	Alive or dead of other cause	32	Alive	One primary only	68	6186695
Other (American Indian/AK Native, Asian/Pacific Islander)	Male	8170	T1	N0	16	No radiation and/or cancer-directed surgery	Surgery performed	Yes	43	998	No	No	No	No	Alive or dead of other cause	21	Alive	1st of 2 or more primaries	76	6187301
White	Male	8170	T3a	N0	0	No radiation and/or cancer-directed surgery	Not recommended	Yes	64	20	No	No	No	No	Dead (attributable to this cancer dx)	11	Dead	One primary only	57	6187442
White	Female	8170	T1	N0	16	No radiation and/or cancer-directed surgery	Surgery performed	Yes	14	20	No	No	No	No	Alive or dead of other cause	26	Alive	One primary only	72	6187477
White	Male	8170	T1	N0	0	No radiation and/or cancer-directed surgery	Not recommended	Yes	17	10	No	No	No	No	Alive or dead of other cause	3	Dead	1st of 2 or more primaries	70	6187517
White	Male	8170	T2	NX	0	No radiation and/or cancer-directed surgery	Not recommended	Yes	27	999	No	No	No	No	Dead (attributable to this cancer dx)	18	Dead	One primary only	60	6187832
White	Female	8170	T2	N0	0	No radiation and/or cancer-directed surgery	Not recommended	Yes	37	10	No	No	No	No	Dead (attributable to this cancer dx)	2	Dead	One primary only	54	6187901
White	Male	8170	T2	N0	0	No radiation and/or cancer-directed surgery	Not recommended	Yes	29	20	No	No	No	No	Alive or dead of other cause	26	Alive	One primary only	63	6187997
Black	Male	8170	T2	N0	0	No radiation and/or cancer-directed surgery	Not recommended	Yes	15	10	No	No	No	No	Dead (attributable to this cancer dx)	10	Dead	One primary only	59	6188107
White	Male	8170	T1	N0	16	No radiation and/or cancer-directed surgery	Surgery performed	Yes	21	20	No	No	No	No	Alive or dead of other cause	25	Alive	One primary only	75	6188161
White	Male	8170	T1	N0	16	No radiation and/or cancer-directed surgery	Surgery performed	No/Unknown	28	10	No	No	No	No	Alive or dead of other cause	29	Alive	One primary only	49	6188184
White	Male	8170	T1	N0	16	No radiation and/or cancer-directed surgery	Surgery performed	No/Unknown	20	10	No	No	No	No	Alive or dead of other cause	27	Alive	One primary only	59	6188256
Other (American Indian/AK Native, Asian/Pacific Islander)	Male	8170	T3b	N0	0	No radiation and/or cancer-directed surgery	Not recommended	No/Unknown	999	10	No	No	No	No	Dead (attributable to this cancer dx)	0	Dead	One primary only	66	6188336
Other (American Indian/AK Native, Asian/Pacific Islander)	Male	8170	T2	N0	16	No radiation and/or cancer-directed surgery	Surgery performed	No/Unknown	26	10	No	No	No	No	Alive or dead of other cause	29	Alive	One primary only	45	6188339
Other (American Indian/AK Native, Asian/Pacific Islander)	Male	8170	T1	N0	61	No radiation and/or cancer-directed surgery	Surgery performed	Yes	14	10	No	No	No	No	Alive or dead of other cause	32	Alive	One primary only	54	6188345
White	Male	8170	T1	N0	0	No radiation and/or cancer-directed surgery	Not recommended	Yes	21	20	No	No	No	No	Dead (attributable to this cancer dx)	28	Dead	One primary only	60	6188364
Other (American Indian/AK Native, Asian/Pacific Islander)	Male	8170	T2	N0	0	No radiation and/or cancer-directed surgery	Not recommended	Yes	12	20	No	No	No	No	Alive or dead of other cause	27	Alive	One primary only	57	6188369
Black	Male	8170	T1	N0	0	No radiation and/or cancer-directed surgery	Not recommended	No/Unknown	77	10	Yes	No	No	No	Dead (attributable to this cancer dx)	1	Dead	One primary only	61	6188372
White	Male	8170	T1	N0	0	No radiation and/or cancer-directed surgery	Not recommended	Yes	28	10	No	No	No	No	Alive or dead of other cause	33	Alive	One primary only	58	6188391
White	Male	8170	T3a	N1	61	No radiation and/or cancer-directed surgery	Surgery performed	Yes	67	10	No	No	No	No	Dead (attributable to this cancer dx)	18	Dead	One primary only	66	6188406
Other (American Indian/AK Native, Asian/Pacific Islander)	Female	8170	T3b	N0	0	No radiation and/or cancer-directed surgery	Not recommended	No/Unknown	97	10	No	No	No	No	Alive or dead of other cause	22	Alive	One primary only	90	6188714
White	Male	8170	T1	N0	0	No radiation and/or cancer-directed surgery	Not recommended	No/Unknown	146	10	No	No	No	No	Alive or dead of other cause	28	Alive	One primary only	54	6188754
White	Male	8170	T2	N0	16	No radiation and/or cancer-directed surgery	Surgery performed	Yes	30	20	No	No	No	No	Alive or dead of other cause	25	Alive	One primary only	72	6188876
White	Male	8170	T2	N0	0	No radiation and/or cancer-directed surgery	Not recommended	No/Unknown	46	10	No	No	No	No	Dead (attributable to this cancer dx)	2	Dead	One primary only	79	6188886
Other (American Indian/AK Native, Asian/Pacific Islander)	Male	8170	T1	N0	24	No radiation and/or cancer-directed surgery	Surgery performed	No/Unknown	21	10	No	No	No	No	Alive or dead of other cause	26	Alive	1st of 2 or more primaries	67	6188933
Other (American Indian/AK Native, Asian/Pacific Islander)	Female	8170	T1	N0	16	No radiation and/or cancer-directed surgery	Surgery performed	Yes	40	10	No	No	No	No	Alive or dead of other cause	29	Alive	1st of 2 or more primaries	86	6189056
White	Male	8170	T1	N0	16	No radiation and/or cancer-directed surgery	Surgery performed	Yes	57	10	No	No	No	No	Alive or dead of other cause	25	Alive	One primary only	47	6189082
Black	Male	8170	T2	N0	0	No radiation and/or cancer-directed surgery	Not recommended	Yes	27	10	No	No	No	No	Alive or dead of other cause	28	Alive	One primary only	60	6189219
Other (American Indian/AK Native, Asian/Pacific Islander)	Male	8170	TX	NX	0	No radiation and/or cancer-directed surgery	Not recommended	No/Unknown	999	10	No	No	No	Yes	Dead (attributable to this cancer dx)	0	Dead	One primary only	48	6189370
White	Male	8170	T1	N0	0	No radiation and/or cancer-directed surgery	Not recommended	No/Unknown	100	20	No	No	No	No	Dead (attributable to this cancer dx)	13	Dead	One primary only	66	6189385
Other (American Indian/AK Native, Asian/Pacific Islander)	Male	8170	T3a	N0	0	No radiation and/or cancer-directed surgery	Recommended, unknown if performed	Yes	200	10	No	No	No	No	Dead (attributable to this cancer dx)	7	Dead	One primary only	52	6189462
White	Female	8170	T1	N0	0	No radiation and/or cancer-directed surgery	Not recommended	No/Unknown	51	999	No	No	No	No	Dead (attributable to this cancer dx)	0	Dead	One primary only	81	6189546
Black	Male	8170	T2	N0	0	No radiation and/or cancer-directed surgery	Not recommended	No/Unknown	30	10	No	No	No	No	Dead (attributable to this cancer dx)	0	Dead	One primary only	58	6189596
White	Male	8170	T3a	N1	0	No radiation and/or cancer-directed surgery	Not recommended	No/Unknown	74	998	Yes	No	No	No	Dead (attributable to this cancer dx)	2	Dead	One primary only	74	6189598
Other (American Indian/AK Native, Asian/Pacific Islander)	Female	8170	T1	N0	0	No radiation and/or cancer-directed surgery	Not recommended	No/Unknown	149	10	No	No	No	No	Dead (attributable to this cancer dx)	2	Dead	One primary only	74	6189626
White	Male	8170	T4	N0	0	No radiation and/or cancer-directed surgery	Not recommended	No/Unknown	116	10	No	No	No	No	Dead (attributable to this cancer dx)	2	Dead	One primary only	75	6189648
Black	Female	8174	T4	N0	0	No radiation and/or cancer-directed surgery	Not recommended	No/Unknown	39	10	No	No	No	No	Dead (attributable to this cancer dx)	0	Dead	One primary only	62	6189654
Other (American Indian/AK Native, Asian/Pacific Islander)	Male	8170	T2	N0	61	No radiation and/or cancer-directed surgery	Surgery performed	Yes	37	20	No	No	No	No	Alive or dead of other cause	26	Alive	One primary only	61	6189658
White	Male	8170	T1	N0	0	No radiation and/or cancer-directed surgery	Not recommended	Yes	21	20	No	No	No	No	Alive or dead of other cause	24	Alive	One primary only	64	6189905
Other (American Indian/AK Native, Asian/Pacific Islander)	Male	8170	T1	N0	0	No radiation and/or cancer-directed surgery	Not recommended	No/Unknown	12	10	No	No	No	No	Alive or dead of other cause	66	Alive	One primary only	53	6189922
Other (American Indian/AK Native, Asian/Pacific Islander)	Male	8170	T2	N0	37	No radiation and/or cancer-directed surgery	Surgery performed	No/Unknown	44	10	No	No	No	No	Dead (attributable to this cancer dx)	22	Dead	1st of 2 or more primaries	82	6189986
Other (American Indian/AK Native, Asian/Pacific Islander)	Female	8170	T1	N0	36	No radiation and/or cancer-directed surgery	Surgery performed	No/Unknown	35	10	No	No	No	No	Alive or dead of other cause	26	Alive	One primary only	56	6190033
Other (American Indian/AK Native, Asian/Pacific Islander)	Male	8170	T1	N0	0	No radiation and/or cancer-directed surgery	Not recommended	Yes	33	10	No	No	No	No	Dead (attributable to this cancer dx)	17	Dead	One primary only	77	6190081
White	Male	8170	T1	N0	0	No radiation and/or cancer-directed surgery	Not recommended	No/Unknown	35	20	No	No	No	No	Alive or dead of other cause	1	Alive	One primary only	51	6190175
Black	Female	8170	T1	N0	16	No radiation and/or cancer-directed surgery	Surgery performed	No/Unknown	28	10	No	No	No	No	Alive or dead of other cause	25	Alive	One primary only	53	6190178
White	Female	8174	T3b	N0	36	No radiation and/or cancer-directed surgery	Surgery performed	Yes	150	10	No	No	No	No	Dead (attributable to this cancer dx)	20	Dead	One primary only	66	6190250
Other (American Indian/AK Native, Asian/Pacific Islander)	Male	8170	T2	N0	0	No radiation and/or cancer-directed surgery	Not recommended, contraindicated due to other cond; autopsy only (1973-2002)	Yes	19	20	No	No	No	No	Alive or dead of other cause	26	Alive	One primary only	71	6190324
White	Male	8170	T2	N1	0	No radiation and/or cancer-directed surgery	Not recommended	No/Unknown	80	10	No	No	No	Yes	Dead (attributable to this cancer dx)	3	Dead	One primary only	66	6190331
Other (American Indian/AK Native, Asian/Pacific Islander)	Female	8170	T3a	N0	0	No radiation and/or cancer-directed surgery	Not recommended	Yes	51	999	No	No	No	No	Alive or dead of other cause	31	Alive	One primary only	77	6190409
White	Female	8170	T1	N0	0	No radiation and/or cancer-directed surgery	Not recommended	Yes	21	30	No	No	No	No	Alive or dead of other cause	26	Alive	One primary only	75	6190416
White	Male	8170	T1	N0	0	No radiation and/or cancer-directed surgery	Not recommended	Yes	13	10	No	No	No	No	Alive or dead of other cause	29	Alive	One primary only	57	6190419
White	Male	8170	T1	N0	0	No radiation and/or cancer-directed surgery	Not recommended	Yes	31	10	No	No	No	No	Alive or dead of other cause	11	Dead	One primary only	62	6190453
Other (American Indian/AK Native, Asian/Pacific Islander)	Male	8170	T1	N0	22	No radiation and/or cancer-directed surgery	Surgery performed	No/Unknown	23	20	No	No	No	No	Alive or dead of other cause	25	Alive	One primary only	57	6190569
Other (American Indian/AK Native, Asian/Pacific Islander)	Male	8170	T1	N0	0	No radiation and/or cancer-directed surgery	Not recommended	No/Unknown	26	20	No	No	No	No	Alive or dead of other cause	26	Alive	One primary only	57	6190712
Other (American Indian/AK Native, Asian/Pacific Islander)	Male	8170	T1	N0	20	No radiation and/or cancer-directed surgery	Surgery performed	No/Unknown	25	998	No	No	No	No	Alive or dead of other cause	25	Alive	One primary only	42	6190827
White	Male	8170	T1	N0	0	No radiation and/or cancer-directed surgery	Not recommended	Yes	50	10	No	No	No	No	Alive or dead of other cause	27	Alive	One primary only	48	6190926
White	Male	8170	T3a	N0	0	No radiation and/or cancer-directed surgery	Not recommended	Yes	51	10	No	No	No	No	Dead (attributable to this cancer dx)	5	Dead	One primary only	63	6190936
Other (American Indian/AK Native, Asian/Pacific Islander)	Male	8170	T1	N0	0	No radiation and/or cancer-directed surgery	Not recommended	Yes	42	20	No	No	No	No	Alive or dead of other cause	27	Alive	One primary only	55	6191093
White	Male	8170	TX	N0	0	No radiation and/or cancer-directed surgery	Not recommended	No/Unknown	999	10	No	No	No	No	Dead (attributable to this cancer dx)	1	Dead	One primary only	67	6191356
Other (American Indian/AK Native, Asian/Pacific Islander)	Male	8170	T4	N0	0	No radiation and/or cancer-directed surgery	Not recommended	No/Unknown	996	10	No	No	No	No	Dead (attributable to this cancer dx)	0	Dead	One primary only	46	6191357
White	Male	8170	T2	N0	0	No radiation and/or cancer-directed surgery	Not recommended	No/Unknown	40	999	Yes	Yes	No	Yes	Dead (attributable to this cancer dx)	4	Dead	One primary only	60	6191360
White	Male	8170	T3a	N0	0	No radiation and/or cancer-directed surgery	Not recommended	Yes	62	10	No	No	No	No	Dead (attributable to this cancer dx)	2	Dead	One primary only	76	6191457
Other (American Indian/AK Native, Asian/Pacific Islander)	Female	8170	T1	N0	23	No radiation and/or cancer-directed surgery	Surgery performed	No/Unknown	120	999	No	No	No	No	Alive or dead of other cause	24	Alive	One primary only	78	6191691
White	Female	8170	T1	N0	0	No radiation and/or cancer-directed surgery	Not recommended	Yes	60	10	No	No	No	No	Dead (attributable to this cancer dx)	12	Dead	One primary only	61	6191707
Other (American Indian/AK Native, Asian/Pacific Islander)	Male	8170	T3a	N0	0	No radiation and/or cancer-directed surgery	Not recommended	Yes	177	10	No	No	No	No	Dead (attributable to this cancer dx)	4	Dead	One primary only	47	6191935
White	Male	8170	T4	N0	0	No radiation and/or cancer-directed surgery	Not recommended	Yes	82	999	No	No	No	No	Dead (attributable to this cancer dx)	3	Dead	One primary only	62	6192111
White	Male	8170	T4	N0	0	No radiation and/or cancer-directed surgery	Not recommended	Yes	150	10	No	No	No	No	Alive or dead of other cause	22	Alive	One primary only	78	6192191
White	Male	8170	T1	N0	0	No radiation and/or cancer-directed surgery	Not recommended	No/Unknown	64	10	No	No	No	No	Alive or dead of other cause	23	Alive	One primary only	61	6192272
White	Female	8170	T1	N0	0	No radiation and/or cancer-directed surgery	Not recommended	No/Unknown	90	10	No	No	No	No	Dead (attributable to this cancer dx)	0	Dead	One primary only	80	6192297
White	Male	8170	T1	N0	0	No radiation and/or cancer-directed surgery	Not recommended	Yes	20	10	No	No	No	No	Alive or dead of other cause	7	Dead	One primary only	59	6192472
Other (American Indian/AK Native, Asian/Pacific Islander)	Male	8170	T3b	N1	0	No radiation and/or cancer-directed surgery	Not recommended	Yes	130	10	No	No	No	No	Dead (attributable to this cancer dx)	4	Dead	One primary only	49	6192474
White	Male	8170	T2	N0	0	No radiation and/or cancer-directed surgery	Not recommended	No/Unknown	12	20	No	No	No	No	Alive or dead of other cause	11	Dead	One primary only	84	6192599
Other (American Indian/AK Native, Asian/Pacific Islander)	Male	8170	T1	N0	16	No radiation and/or cancer-directed surgery	Surgery performed	No/Unknown	38	10	No	No	No	No	Alive or dead of other cause	25	Alive	One primary only	64	6193017
White	Female	8170	T1	N0	0	No radiation and/or cancer-directed surgery	Not recommended	No/Unknown	150	998	No	No	No	Yes	Dead (attributable to this cancer dx)	0	Dead	One primary only	82	6193025
White	Male	8170	T1	N0	0	No radiation and/or cancer-directed surgery	Not recommended	Yes	35	10	No	No	No	No	Alive or dead of other cause	11	Dead	1st of 2 or more primaries	79	6193222
White	Male	8170	T2	N0	16	No radiation and/or cancer-directed surgery	Surgery performed	Yes	39	10	No	No	No	No	Alive or dead of other cause	23	Alive	One primary only	63	6193345
White	Male	8170	T1	N0	0	No radiation and/or cancer-directed surgery	Not recommended	No/Unknown	17	10	No	No	No	Yes	Dead (attributable to this cancer dx)	1	Dead	One primary only	82	6193423
White	Male	8170	T1	N0	0	No radiation and/or cancer-directed surgery	Not recommended	Yes	40	20	No	No	No	No	Alive or dead of other cause	41	Alive	One primary only	59	6193546
White	Male	8170	T2	N0	0	No radiation and/or cancer-directed surgery	Not recommended	Yes	31	999	No	No	No	No	Dead (attributable to this cancer dx)	0	Dead	One primary only	69	6193796
Other (American Indian/AK Native, Asian/Pacific Islander)	Female	8170	T1	N0	0	No radiation and/or cancer-directed surgery	Not recommended	Yes	13	10	No	No	No	No	Alive or dead of other cause	29	Alive	One primary only	62	6193902
White	Female	8170	T2	N0	0	No radiation and/or cancer-directed surgery	Not recommended	No/Unknown	7	20	No	No	No	No	Alive or dead of other cause	30	Alive	One primary only	60	6193942
White	Male	8170	T2	N0	15	Radiation prior to surgery	Surgery performed	No/Unknown	24	10	No	No	No	No	Alive or dead of other cause	25	Alive	One primary only	57	6193981
Black	Male	8170	T1	N0	0	No radiation and/or cancer-directed surgery	Not recommended	No/Unknown	18	10	Yes	No	No	Yes	Dead (attributable to this cancer dx)	1	Dead	One primary only	68	6194089
Black	Male	8170	T2	N0	16	No radiation and/or cancer-directed surgery	Surgery performed	Yes	37	10	No	No	No	No	Alive or dead of other cause	25	Alive	1st of 2 or more primaries	82	6194168
Black	Male	8170	T3b	N0	0	No radiation and/or cancer-directed surgery	Not recommended	No/Unknown	999	10	No	No	No	No	Dead (attributable to this cancer dx)	0	Dead	One primary only	64	6194210
Other (American Indian/AK Native, Asian/Pacific Islander)	Female	8170	TX	NX	0	No radiation and/or cancer-directed surgery	Not recommended	No/Unknown	999	999	No	No	No	Yes	Alive or dead of other cause	0	Dead	One primary only	81	6194248
Other (American Indian/AK Native, Asian/Pacific Islander)	Male	8170	T1	N0	16	No radiation and/or cancer-directed surgery	Surgery performed	Yes	30	20	No	No	No	No	Dead (attributable to this cancer dx)	11	Dead	One primary only	61	6194275
Black	Female	8170	TX	NX	0	No radiation and/or cancer-directed surgery	Not recommended	No/Unknown	999	999	No	No	No	No	Alive or dead of other cause	0	Dead	One primary only	64	6194524
White	Female	8170	T3a	N0	0	No radiation and/or cancer-directed surgery	Not recommended	Yes	53	20	No	No	No	No	Dead (attributable to this cancer dx)	11	Dead	One primary only	77	6194973
White	Male	8170	T3b	N1	0	No radiation and/or cancer-directed surgery	Not recommended	Yes	93	10	No	No	Yes	Yes	Dead (attributable to this cancer dx)	7	Dead	One primary only	63	6195183
Other (American Indian/AK Native, Asian/Pacific Islander)	Male	8170	T3b	N0	0	No radiation and/or cancer-directed surgery	Not recommended	No/Unknown	77	10	No	No	No	No	Dead (attributable to this cancer dx)	1	Dead	One primary only	78	6195200
White	Male	8170	T1	N0	0	No radiation and/or cancer-directed surgery	Not recommended	No/Unknown	67	10	No	No	No	Yes	Dead (attributable to this cancer dx)	0	Dead	One primary only	58	6195228
White	Female	8170	T1	N0	61	No radiation and/or cancer-directed surgery	Surgery performed	No/Unknown	12	10	No	No	No	No	Alive or dead of other cause	50	Alive	One primary only	65	6195241
White	Male	8170	T1	N0	0	No radiation and/or cancer-directed surgery	Not recommended	Yes	40	20	No	No	No	No	Alive or dead of other cause	25	Alive	One primary only	62	6195309
Black	Male	8170	T1	N0	16	No radiation and/or cancer-directed surgery	Surgery performed	No/Unknown	26	10	No	No	No	No	Dead (attributable to this cancer dx)	17	Dead	One primary only	67	6195312
White	Male	8170	T1	N0	0	No radiation and/or cancer-directed surgery	Recommended, unknown if performed	No/Unknown	20	20	No	No	No	No	Alive or dead of other cause	16	Dead	One primary only	50	6195383
White	Male	8170	T1	N0	0	No radiation and/or cancer-directed surgery	Not recommended, contraindicated due to other cond; autopsy only (1973-2002)	No/Unknown	32	10	No	No	No	No	Dead (attributable to this cancer dx)	7	Dead	One primary only	59	6195385
Other (American Indian/AK Native, Asian/Pacific Islander)	Female	8170	T3a	N0	0	No radiation and/or cancer-directed surgery	Not recommended	No/Unknown	64	10	No	No	No	No	Dead (attributable to this cancer dx)	1	Dead	One primary only	80	6195579
White	Male	8174	TX	N0	0	No radiation and/or cancer-directed surgery	Not recommended	No/Unknown	999	999	No	No	No	Yes	Dead (attributable to this cancer dx)	1	Dead	One primary only	38	6195590
White	Male	8170	T1	N0	0	No radiation and/or cancer-directed surgery	Not recommended	Yes	65	20	No	No	No	No	Dead (attributable to this cancer dx)	18	Dead	One primary only	78	6195638
White	Male	8170	T2	N0	24	No radiation and/or cancer-directed surgery	Surgery performed	No/Unknown	100	10	No	No	No	No	Dead (attributable to this cancer dx)	12	Dead	One primary only	63	6195741
White	Male	8170	T1	N0	13	No radiation and/or cancer-directed surgery	Surgery performed	Yes	33	10	No	No	No	No	Dead (attributable to this cancer dx)	14	Dead	One primary only	64	6195779
Other (American Indian/AK Native, Asian/Pacific Islander)	Female	8170	T1	N0	0	No radiation and/or cancer-directed surgery	Not recommended	Yes	24	10	No	No	No	No	Alive or dead of other cause	15	Dead	One primary only	77	6195872
Other (American Indian/AK Native, Asian/Pacific Islander)	Male	8170	T1	N0	23	No radiation and/or cancer-directed surgery	Surgery performed	Yes	20	20	No	No	No	No	Alive or dead of other cause	31	Alive	One primary only	68	6195923
Other (American Indian/AK Native, Asian/Pacific Islander)	Male	8170	T3b	N0	61	No radiation and/or cancer-directed surgery	Surgery performed	No/Unknown	30	999	No	No	No	No	Dead (attributable to this cancer dx)	10	Dead	One primary only	61	6196058
White	Female	8170	T3b	N0	0	No radiation and/or cancer-directed surgery	Not recommended	Yes	43	10	No	No	No	No	Dead (attributable to this cancer dx)	21	Dead	One primary only	52	6196321
White	Male	8170	T1	N0	16	No radiation and/or cancer-directed surgery	Surgery performed	No/Unknown	26	20	No	No	No	No	Dead (attributable to this cancer dx)	14	Dead	One primary only	61	6196482
Other (American Indian/AK Native, Asian/Pacific Islander)	Male	8170	T1	N0	0	No radiation and/or cancer-directed surgery	Not recommended	Yes	140	10	No	No	No	No	Alive or dead of other cause	3	Dead	One primary only	65	6196498
White	Female	8170	T2	N0	36	No radiation and/or cancer-directed surgery	Surgery performed	No/Unknown	41	10	No	No	No	No	Alive or dead of other cause	23	Alive	One primary only	66	6196555
White	Male	8170	T1	N0	0	No radiation and/or cancer-directed surgery	Not recommended	No/Unknown	35	999	No	No	No	No	Dead (attributable to this cancer dx)	21	Dead	One primary only	60	6196674
Black	Male	8170	T2	N0	0	No radiation and/or cancer-directed surgery	Not recommended	Yes	47	20	No	No	No	No	Dead (attributable to this cancer dx)	21	Dead	One primary only	61	6196692
White	Male	8170	T3a	N0	0	No radiation and/or cancer-directed surgery	Not recommended	Yes	53	10	No	No	No	No	Dead (attributable to this cancer dx)	12	Dead	One primary only	63	6196712
White	Male	8170	T1	N0	16	No radiation and/or cancer-directed surgery	Surgery performed	No/Unknown	20	10	No	No	No	No	Alive or dead of other cause	29	Alive	One primary only	54	6196715
White	Male	8170	T1	N0	0	No radiation and/or cancer-directed surgery	Not recommended	No/Unknown	30	999	No	No	No	No	Alive or dead of other cause	1	Dead	One primary only	56	6196729
Other (American Indian/AK Native, Asian/Pacific Islander)	Female	8170	T3a	N0	0	No radiation and/or cancer-directed surgery	Not recommended	Yes	70	998	No	No	No	No	Dead (attributable to this cancer dx)	17	Dead	One primary only	86	6197279
White	Female	8170	T2	N0	0	No radiation and/or cancer-directed surgery	Not recommended	Yes	12	10	No	No	No	No	Alive or dead of other cause	30	Alive	One primary only	56	6197385
White	Male	8170	T1	N0	61	No radiation and/or cancer-directed surgery	Surgery performed	Yes	27	20	No	No	No	No	Alive or dead of other cause	24	Alive	One primary only	60	6197388
White	Male	8170	T4	N0	16	No radiation and/or cancer-directed surgery	Surgery performed	Yes	45	10	No	No	No	No	Alive or dead of other cause	23	Alive	One primary only	74	6197494
Black	Male	8170	T3a	N0	0	No radiation and/or cancer-directed surgery	Not recommended	No/Unknown	91	998	No	No	No	No	Dead (attributable to this cancer dx)	5	Dead	One primary only	72	6197598
Other (American Indian/AK Native, Asian/Pacific Islander)	Male	8170	T3b	N0	0	No radiation and/or cancer-directed surgery	Not recommended	No/Unknown	999	10	No	No	No	No	Dead (attributable to this cancer dx)	0	Dead	One primary only	51	6197604
White	Male	8170	T2	N0	16	No radiation and/or cancer-directed surgery	Surgery performed	No/Unknown	23	20	No	No	No	No	Alive or dead of other cause	23	Alive	1st of 2 or more primaries	56	6197606
White	Male	8170	T1	N0	0	No radiation and/or cancer-directed surgery	Not recommended	Yes	12	10	No	No	No	No	Alive or dead of other cause	23	Alive	One primary only	54	6197635
Other (American Indian/AK Native, Asian/Pacific Islander)	Male	8170	T3a	N0	0	No radiation and/or cancer-directed surgery	Not recommended	No/Unknown	170	10	No	No	No	Yes	Alive or dead of other cause	0	Alive	One primary only	30	6197642
White	Female	8170	TX	N0	0	No radiation and/or cancer-directed surgery	Not recommended	No/Unknown	999	999	Yes	No	No	Yes	Alive or dead of other cause	0	Dead	One primary only	72	6197658
Black	Male	8170	T2	N1	0	No radiation and/or cancer-directed surgery	Not recommended	No/Unknown	8	10	No	No	No	Yes	Dead (attributable to this cancer dx)	0	Dead	One primary only	70	6197660
White	Male	8170	T1	N0	0	No radiation and/or cancer-directed surgery	Not recommended	Yes	72	20	No	No	No	No	Dead (attributable to this cancer dx)	13	Dead	One primary only	81	6197717
White	Female	8170	T1	N1	0	No radiation and/or cancer-directed surgery	Not recommended	No/Unknown	60	999	No	No	No	No	Alive or dead of other cause	0	Alive	One primary only	54	6197731
White	Male	8170	T2	N0	0	No radiation and/or cancer-directed surgery	Not recommended	Yes	992	10	No	No	No	No	Dead (attributable to this cancer dx)	1	Dead	1st of 2 or more primaries	66	6197750
White	Male	8170	T2	N0	61	No radiation and/or cancer-directed surgery	Surgery performed	No/Unknown	22	20	No	No	No	No	Alive or dead of other cause	10	Dead	One primary only	61	6197880
White	Male	8170	T3b	N1	0	No radiation and/or cancer-directed surgery	Not recommended	No/Unknown	70	10	No	No	No	Yes	Dead (attributable to this cancer dx)	1	Dead	One primary only	72	6198078
Black	Male	8170	T3b	N1	0	No radiation and/or cancer-directed surgery	Not recommended	Yes	165	10	No	No	No	No	Dead (attributable to this cancer dx)	6	Dead	One primary only	69	6198164
White	Male	8170	T1	N0	0	No radiation and/or cancer-directed surgery	Not recommended	Yes	94	10	No	No	No	No	Alive or dead of other cause	23	Alive	One primary only	76	6198165
White	Male	8170	T2	N0	0	No radiation and/or cancer-directed surgery	Not recommended	No/Unknown	25	10	No	No	No	No	Dead (attributable to this cancer dx)	14	Dead	One primary only	80	6198256
White	Female	8170	T1	N0	61	No radiation and/or cancer-directed surgery	Surgery performed	Yes	35	999	No	No	No	No	Alive or dead of other cause	21	Alive	One primary only	58	6198276
White	Male	8170	T3b	N0	0	No radiation and/or cancer-directed surgery	Not recommended	No/Unknown	84	10	No	No	No	No	Alive or dead of other cause	12	Dead	One primary only	68	6198450
Black	Male	8170	T1	N0	0	No radiation and/or cancer-directed surgery	Not recommended	No/Unknown	20	999	Yes	Yes	No	Yes	Dead (attributable to this cancer dx)	3	Dead	One primary only	63	6198492
White	Male	8170	T1	N0	36	No radiation and/or cancer-directed surgery	Surgery performed	No/Unknown	90	10	No	No	No	No	Alive or dead of other cause	23	Alive	One primary only	76	6198695
Other (American Indian/AK Native, Asian/Pacific Islander)	Female	8170	T1	N0	51	No radiation and/or cancer-directed surgery	Surgery performed	No/Unknown	73	20	No	No	No	No	Alive or dead of other cause	17	Alive	1st of 2 or more primaries	75	6198725
White	Male	8170	T1	N0	16	No radiation and/or cancer-directed surgery	Surgery performed	Yes	27	20	No	No	No	No	Dead (attributable to this cancer dx)	6	Dead	One primary only	71	6198727
Other (American Indian/AK Native, Asian/Pacific Islander)	Male	8170	T1	N0	16	No radiation and/or cancer-directed surgery	Surgery performed	Yes	16	20	No	No	No	No	Alive or dead of other cause	24	Alive	One primary only	70	6198964
White	Male	8170	T1	N0	16	No radiation and/or cancer-directed surgery	Surgery performed	No/Unknown	10	10	No	No	No	No	Alive or dead of other cause	23	Alive	One primary only	68	6199148
Other (American Indian/AK Native, Asian/Pacific Islander)	Male	8170	T2	N0	0	No radiation and/or cancer-directed surgery	Not recommended	Yes	50	10	No	No	No	No	Dead (attributable to this cancer dx)	19	Dead	One primary only	65	6199432
Black	Male	8170	T3b	N1	0	No radiation and/or cancer-directed surgery	Not recommended	No/Unknown	42	10	No	No	No	No	Dead (attributable to this cancer dx)	3	Dead	One primary only	64	6199456
White	Female	8170	T1	N0	0	No radiation and/or cancer-directed surgery	Not recommended	Yes	45	999	No	No	No	No	Alive or dead of other cause	7	Alive	1st of 2 or more primaries	82	6199777
White	Male	8170	T1	N0	16	No radiation and/or cancer-directed surgery	Surgery performed	No/Unknown	17	998	No	No	No	No	Alive or dead of other cause	22	Alive	One primary only	74	6199908
Other (American Indian/AK Native, Asian/Pacific Islander)	Male	8174	TX	N1	0	No radiation and/or cancer-directed surgery	Not recommended	Yes	999	10	No	No	No	No	Dead (attributable to this cancer dx)	2	Dead	One primary only	50	6199975
Other (American Indian/AK Native, Asian/Pacific Islander)	Male	8170	T4	N0	0	No radiation and/or cancer-directed surgery	Not recommended	Yes	999	10	No	No	No	Yes	Dead (attributable to this cancer dx)	5	Dead	One primary only	49	6199991
Other (American Indian/AK Native, Asian/Pacific Islander)	Female	8170	T2	N0	0	No radiation and/or cancer-directed surgery	Not recommended	Yes	18	10	No	No	No	No	Alive or dead of other cause	24	Alive	One primary only	62	6200022
Other (American Indian/AK Native, Asian/Pacific Islander)	Female	8170	T1	N0	0	No radiation and/or cancer-directed surgery	Not recommended	Yes	33	20	No	No	No	No	Alive or dead of other cause	21	Alive	One primary only	77	6200025
Other (American Indian/AK Native, Asian/Pacific Islander)	Male	8170	T2	N0	15	No radiation and/or cancer-directed surgery	Surgery performed	Yes	34	10	No	No	No	No	Dead (attributable to this cancer dx)	5	Dead	One primary only	58	6200032
Other (American Indian/AK Native, Asian/Pacific Islander)	Male	8170	T1	N0	0	No radiation and/or cancer-directed surgery	Not recommended	Yes	20	10	No	No	No	No	Alive or dead of other cause	22	Alive	One primary only	59	6200033
White	Female	8170	T1	N0	0	No radiation and/or cancer-directed surgery	Not recommended	Yes	26	10	No	No	No	No	Alive or dead of other cause	23	Alive	One primary only	55	6200108
White	Male	8170	T1	N0	0	No radiation and/or cancer-directed surgery	Not recommended	Yes	22	20	No	No	No	No	Alive or dead of other cause	23	Alive	1st of 2 or more primaries	61	6200170
White	Female	8170	TX	N0	0	No radiation and/or cancer-directed surgery	Recommended but not performed, patient refused	No/Unknown	999	10	No	No	No	No	Dead (attributable to this cancer dx)	1	Dead	One primary only	86	6200353
Black	Female	8170	T3a	N0	0	No radiation and/or cancer-directed surgery	Not recommended	No/Unknown	55	997	No	No	No	No	Dead (attributable to this cancer dx)	8	Dead	1st of 2 or more primaries	63	6200411
White	Male	8170	TX	NX	0	No radiation and/or cancer-directed surgery	Not recommended	No/Unknown	999	998	No	No	Yes	No	Dead (attributable to this cancer dx)	1	Dead	One primary only	70	6200727
Other (American Indian/AK Native, Asian/Pacific Islander)	Male	8170	T2	N0	0	No radiation and/or cancer-directed surgery	Not recommended	Yes	140	20	No	No	No	No	Alive or dead of other cause	1	Dead	One primary only	79	6200826
White	Male	8170	T2	N0	16	No radiation and/or cancer-directed surgery	Surgery performed	Yes	28	10	No	No	No	No	Alive or dead of other cause	15	Dead	One primary only	62	6201156
Other (American Indian/AK Native, Asian/Pacific Islander)	Male	8170	T2	N0	0	No radiation and/or cancer-directed surgery	Not recommended	No/Unknown	23	10	No	No	No	No	Dead (attributable to this cancer dx)	28	Dead	One primary only	51	6201473
White	Male	8170	T1	N1	0	No radiation and/or cancer-directed surgery	Not recommended	Yes	35	10	No	No	No	No	Dead (attributable to this cancer dx)	14	Dead	One primary only	60	6201481
Other (American Indian/AK Native, Asian/Pacific Islander)	Female	8170	T1	N0	0	No radiation and/or cancer-directed surgery	Not recommended	Yes	39	10	No	No	No	No	Alive or dead of other cause	24	Alive	One primary only	82	6201500
White	Male	8170	T3a	N0	0	No radiation and/or cancer-directed surgery	Not recommended	Yes	61	10	No	No	No	No	Alive or dead of other cause	20	Alive	One primary only	79	6201974
Other (American Indian/AK Native, Asian/Pacific Islander)	Female	8170	T1	N0	0	No radiation and/or cancer-directed surgery	Not recommended	Yes	24	10	No	No	No	No	Alive or dead of other cause	20	Alive	One primary only	88	6201975
Other (American Indian/AK Native, Asian/Pacific Islander)	Male	8170	T1	N0	16	No radiation and/or cancer-directed surgery	Surgery performed	No/Unknown	10	10	No	No	No	No	Alive or dead of other cause	27	Alive	One primary only	50	6202287
Other (American Indian/AK Native, Asian/Pacific Islander)	Male	8170	T1	N0	0	No radiation and/or cancer-directed surgery	Not recommended	Yes	26	20	No	No	No	No	Alive or dead of other cause	22	Alive	One primary only	56	6202294
Other (American Indian/AK Native, Asian/Pacific Islander)	Female	8170	T1	N0	60	No radiation and/or cancer-directed surgery	Surgery performed	No/Unknown	23	10	No	No	No	No	Dead (attributable to this cancer dx)	14	Dead	One primary only	80	6202318
Black	Female	8170	T1	N0	16	No radiation and/or cancer-directed surgery	Surgery performed	No/Unknown	15	20	No	No	No	No	Alive or dead of other cause	22	Alive	One primary only	64	6202451
White	Male	8170	T2	N0	0	No radiation and/or cancer-directed surgery	Not recommended	Yes	21	20	No	No	No	No	Alive or dead of other cause	22	Alive	One primary only	52	6202452
Black	Male	8170	T2	N0	0	No radiation and/or cancer-directed surgery	Not recommended	No/Unknown	992	10	No	No	No	No	Dead (attributable to this cancer dx)	7	Dead	One primary only	65	6202896
Other (American Indian/AK Native, Asian/Pacific Islander)	Male	8170	T2	N0	0	No radiation and/or cancer-directed surgery	Not recommended	Yes	20	20	No	No	No	No	Alive or dead of other cause	21	Alive	One primary only	57	6203035
Other (American Indian/AK Native, Asian/Pacific Islander)	Male	8170	T3a	N0	0	No radiation and/or cancer-directed surgery	Not recommended	No/Unknown	227	10	No	No	No	No	Dead (attributable to this cancer dx)	2	Dead	One primary only	75	6203037
Other (American Indian/AK Native, Asian/Pacific Islander)	Female	8170	T2	N0	0	No radiation and/or cancer-directed surgery	Not recommended	Yes	57	10	No	No	No	No	Dead (attributable to this cancer dx)	18	Dead	One primary only	74	6203208
White	Male	8170	TX	N0	0	No radiation and/or cancer-directed surgery	Not recommended	No/Unknown	999	10	No	No	No	No	Dead (attributable to this cancer dx)	1	Dead	One primary only	65	6203225
White	Female	8170	T1	N0	23	No radiation and/or cancer-directed surgery	Surgery performed	Yes	27	10	No	No	No	No	Alive or dead of other cause	23	Alive	One primary only	66	6203262
White	Male	8170	T2	N0	0	No radiation and/or cancer-directed surgery	Not recommended	Yes	38	10	No	No	No	No	Alive or dead of other cause	21	Alive	One primary only	64	6203274
White	Male	8170	T2	N1	16	No radiation and/or cancer-directed surgery	Surgery performed	No/Unknown	26	10	No	No	No	No	Alive or dead of other cause	21	Alive	One primary only	58	6203441
White	Male	8170	T3a	N0	0	No radiation and/or cancer-directed surgery	Not recommended	No/Unknown	65	20	No	No	No	No	Dead (attributable to this cancer dx)	6	Dead	One primary only	68	6203450
Other (American Indian/AK Native, Asian/Pacific Islander)	Male	8170	T3b	N0	0	No radiation and/or cancer-directed surgery	Not recommended	Yes	90	10	No	No	No	No	Alive or dead of other cause	6	Dead	One primary only	80	6203603
White	Male	8170	T1	N0	0	No radiation and/or cancer-directed surgery	Not recommended	No/Unknown	15	997	No	No	No	No	Dead (attributable to this cancer dx)	11	Dead	One primary only	63	6203687
Other (American Indian/AK Native, Asian/Pacific Islander)	Female	8170	T1	N0	0	No radiation and/or cancer-directed surgery	Not recommended	Yes	19	20	No	No	No	No	Alive or dead of other cause	21	Alive	One primary only	76	6203690
Other (American Indian/AK Native, Asian/Pacific Islander)	Male	8170	T3a	N0	0	No radiation and/or cancer-directed surgery	Not recommended	No/Unknown	167	10	No	No	No	Yes	Dead (attributable to this cancer dx)	4	Dead	One primary only	55	6203730
White	Male	8170	T3b	N0	0	No radiation and/or cancer-directed surgery	Not recommended	Yes	97	20	No	No	No	No	Dead (attributable to this cancer dx)	3	Dead	One primary only	53	6203898
White	Male	8170	T2	N0	0	No radiation and/or cancer-directed surgery	Not recommended, contraindicated due to other cond; autopsy only (1973-2002)	No/Unknown	43	10	No	No	No	No	Dead (attributable to this cancer dx)	6	Dead	One primary only	66	6204043
White	Male	8170	T3b	N1	0	No radiation and/or cancer-directed surgery	Not recommended, contraindicated due to other cond; autopsy only (1973-2002)	No/Unknown	43	10	No	No	No	Yes	Dead (attributable to this cancer dx)	8	Dead	One primary only	65	6204046
White	Male	8170	T3a	N0	0	No radiation and/or cancer-directed surgery	Not recommended	Yes	67	20	No	No	No	No	Dead (attributable to this cancer dx)	37	Dead	One primary only	58	6204048
White	Male	8170	TX	N0	0	No radiation and/or cancer-directed surgery	Not recommended	No/Unknown	999	10	No	No	No	No	Dead (attributable to this cancer dx)	0	Dead	One primary only	82	6204112
Other (American Indian/AK Native, Asian/Pacific Islander)	Male	8170	T3a	N0	0	No radiation and/or cancer-directed surgery	Not recommended	Yes	190	10	No	No	No	No	Alive or dead of other cause	20	Dead	One primary only	74	6204113
White	Male	8170	T1	N0	23	No radiation and/or cancer-directed surgery	Surgery performed	No/Unknown	28	20	No	No	No	No	Alive or dead of other cause	20	Alive	One primary only	84	6204209
White	Male	8170	T1	NX	0	No radiation and/or cancer-directed surgery	Not recommended	Yes	999	999	No	No	No	No	Dead (attributable to this cancer dx)	11	Dead	One primary only	60	6204211
Other (American Indian/AK Native, Asian/Pacific Islander)	Male	8170	T1	N0	0	No radiation and/or cancer-directed surgery	Not recommended	No/Unknown	10	20	No	No	No	No	Alive or dead of other cause	14	Dead	1st of 2 or more primaries	86	6204373
White	Male	8170	T1	N0	0	No radiation and/or cancer-directed surgery	Not recommended	Yes	33	10	No	No	No	No	Alive or dead of other cause	22	Alive	One primary only	48	6204429
White	Male	8170	T2	N0	0	No radiation and/or cancer-directed surgery	Not recommended	Yes	20	20	No	No	No	No	Alive or dead of other cause	24	Dead	One primary only	60	6204444
White	Male	8170	T2	N0	0	No radiation and/or cancer-directed surgery	Not recommended	Yes	27	20	No	No	No	No	Dead (attributable to this cancer dx)	6	Dead	One primary only	57	6204475
White	Male	8170	T1	N0	0	No radiation and/or cancer-directed surgery	Not recommended	Yes	22	10	No	No	No	No	Dead (attributable to this cancer dx)	18	Dead	1st of 2 or more primaries	71	6204596
Black	Female	8170	T2	N0	0	No radiation and/or cancer-directed surgery	Not recommended	Yes	40	10	No	No	No	No	Dead (attributable to this cancer dx)	4	Dead	One primary only	73	6204693
White	Male	8170	T1	N0	0	No radiation and/or cancer-directed surgery	Not recommended	Yes	43	10	No	No	No	No	Alive or dead of other cause	23	Alive	One primary only	61	6204809
Other (American Indian/AK Native, Asian/Pacific Islander)	Male	8170	T1	N0	16	No radiation and/or cancer-directed surgery	Surgery performed	No/Unknown	30	10	No	No	No	No	Alive or dead of other cause	21	Alive	One primary only	48	6204811
Other (American Indian/AK Native, Asian/Pacific Islander)	Male	8170	T3b	N0	0	No radiation and/or cancer-directed surgery	Not recommended	Yes	36	10	No	No	No	No	Alive or dead of other cause	19	Alive	One primary only	62	6204819
White	Male	8170	T3a	N0	0	No radiation and/or cancer-directed surgery	Not recommended	No/Unknown	58	10	No	No	No	Yes	Dead (attributable to this cancer dx)	0	Dead	One primary only	65	6204829
White	Male	8170	T3a	N1	0	No radiation and/or cancer-directed surgery	Not recommended	No/Unknown	54	10	No	No	No	No	Dead (attributable to this cancer dx)	0	Dead	One primary only	54	6204952
White	Male	8170	T1	N0	0	No radiation and/or cancer-directed surgery	Not recommended	Yes	53	999	No	No	No	No	Alive or dead of other cause	30	Alive	One primary only	61	6204988
Other (American Indian/AK Native, Asian/Pacific Islander)	Female	8170	T2	N0	0	No radiation and/or cancer-directed surgery	Not recommended	Yes	30	20	No	No	No	No	Dead (attributable to this cancer dx)	13	Dead	One primary only	72	6205041
White	Male	8170	T1	N0	61	No radiation and/or cancer-directed surgery	Surgery performed	Yes	24	20	No	No	No	No	Alive or dead of other cause	21	Alive	One primary only	64	6205201
White	Male	8170	T3a	N0	0	No radiation and/or cancer-directed surgery	Not recommended	No/Unknown	180	10	No	No	No	No	Dead (attributable to this cancer dx)	4	Dead	One primary only	67	6205366
Other (American Indian/AK Native, Asian/Pacific Islander)	Male	8170	T1	N0	21	No radiation and/or cancer-directed surgery	Surgery performed	No/Unknown	55	20	No	No	No	No	Alive or dead of other cause	20	Alive	One primary only	82	6205379
White	Male	8170	T1	N0	0	No radiation and/or cancer-directed surgery	Not recommended	Yes	42	10	No	No	No	No	Dead (attributable to this cancer dx)	20	Dead	One primary only	47	6205501
White	Male	8170	T2	N0	0	No radiation and/or cancer-directed surgery	Not recommended	Yes	24	20	No	No	No	No	Alive or dead of other cause	30	Alive	One primary only	62	6205518
Other (American Indian/AK Native, Asian/Pacific Islander)	Male	8170	T1	N0	0	No radiation and/or cancer-directed surgery	Not recommended	Yes	20	20	No	No	No	No	Alive or dead of other cause	20	Alive	One primary only	70	6205555
Other (American Indian/AK Native, Asian/Pacific Islander)	Male	8170	T1	N0	20	No radiation and/or cancer-directed surgery	Surgery performed	No/Unknown	25	20	No	No	No	No	Alive or dead of other cause	21	Alive	One primary only	62	6205584
White	Male	8170	T3a	N1	0	No radiation and/or cancer-directed surgery	Not recommended	Yes	69	10	No	No	No	No	Alive or dead of other cause	21	Alive	One primary only	65	6205772
White	Female	8170	T1	N0	52	No radiation and/or cancer-directed surgery	Surgery performed	No/Unknown	70	998	No	No	No	No	Dead (attributable to this cancer dx)	0	Dead	One primary only	63	6206472
White	Female	8170	T1	N0	0	No radiation and/or cancer-directed surgery	Recommended, unknown if performed	No/Unknown	45	999	No	No	No	No	Dead (attributable to this cancer dx)	14	Dead	One primary only	66	6206691
Other (American Indian/AK Native, Asian/Pacific Islander)	Male	8170	T3a	N0	0	No radiation and/or cancer-directed surgery	Not recommended	Yes	75	10	No	No	No	No	Dead (attributable to this cancer dx)	9	Dead	One primary only	71	6206855
White	Male	8170	T1	NX	0	No radiation and/or cancer-directed surgery	Not recommended	No/Unknown	18	10	No	No	No	No	Alive or dead of other cause	20	Alive	One primary only	45	6207040
Other (American Indian/AK Native, Asian/Pacific Islander)	Male	8170	T3b	N1	0	No radiation and/or cancer-directed surgery	Not recommended	No/Unknown	95	10	No	No	No	No	Dead (attributable to this cancer dx)	3	Dead	One primary only	45	6207059
Other (American Indian/AK Native, Asian/Pacific Islander)	Female	8170	T1	N0	0	No radiation and/or cancer-directed surgery	Not recommended	No/Unknown	137	999	No	No	No	No	Dead (attributable to this cancer dx)	1	Dead	One primary only	96	6207135
White	Male	8170	T2	N1	0	No radiation and/or cancer-directed surgery	Not recommended	No/Unknown	25	10	Yes	No	No	No	Dead (attributable to this cancer dx)	0	Dead	One primary only	63	6207138
Other (American Indian/AK Native, Asian/Pacific Islander)	Female	8173	T4	N0	0	No radiation and/or cancer-directed surgery	Not recommended	No/Unknown	116	10	No	No	No	No	Dead (attributable to this cancer dx)	1	Dead	One primary only	47	6207177
Other (American Indian/AK Native, Asian/Pacific Islander)	Male	8170	T3b	N0	0	No radiation and/or cancer-directed surgery	Not recommended	No/Unknown	200	10	Yes	No	No	Yes	Dead (attributable to this cancer dx)	1	Dead	One primary only	60	6207335
White	Male	8170	T2	N0	0	No radiation and/or cancer-directed surgery	Not recommended	Yes	31	999	No	No	No	No	Dead (attributable to this cancer dx)	7	Dead	One primary only	48	6207336
White	Female	8170	T2	N0	0	No radiation and/or cancer-directed surgery	Not recommended	Yes	42	999	No	No	No	No	Dead (attributable to this cancer dx)	15	Dead	One primary only	53	6207343
Other (American Indian/AK Native, Asian/Pacific Islander)	Male	8170	T2	N0	0	No radiation and/or cancer-directed surgery	Not recommended	No/Unknown	15	999	No	No	No	No	Alive or dead of other cause	28	Alive	One primary only	66	6207346
Other (American Indian/AK Native, Asian/Pacific Islander)	Male	8170	T1	N0	36	No radiation and/or cancer-directed surgery	Surgery performed	No/Unknown	22	20	No	No	No	No	Alive or dead of other cause	18	Alive	1st of 2 or more primaries	76	6207353
White	Male	8170	T1	N0	0	No radiation and/or cancer-directed surgery	Not recommended	Yes	31	10	No	No	No	No	Dead (attributable to this cancer dx)	13	Dead	One primary only	58	6207462
White	Male	8170	T1	N0	0	No radiation and/or cancer-directed surgery	Not recommended	No/Unknown	999	10	No	No	No	Yes	Alive or dead of other cause	18	Alive	One primary only	88	6207563
Other (American Indian/AK Native, Asian/Pacific Islander)	Male	8170	T4	N1	0	No radiation and/or cancer-directed surgery	Not recommended	No/Unknown	996	10	No	No	No	No	Dead (attributable to this cancer dx)	0	Dead	One primary only	96	6207566
Other (American Indian/AK Native, Asian/Pacific Islander)	Male	8170	T1	N0	30	No radiation and/or cancer-directed surgery	Surgery performed	No/Unknown	15	20	No	No	No	No	Alive or dead of other cause	22	Alive	One primary only	49	6207575
Black	Male	8170	T3a	N0	37	No radiation and/or cancer-directed surgery	Surgery performed	No/Unknown	95	10	No	No	No	No	Dead (attributable to this cancer dx)	4	Dead	One primary only	64	6207602
White	Male	8170	T3a	NX	0	No radiation and/or cancer-directed surgery	Not recommended	Yes	70	10	No	No	No	No	Dead (attributable to this cancer dx)	18	Dead	One primary only	68	6207898
Other (American Indian/AK Native, Asian/Pacific Islander)	Male	8170	T3b	N0	0	No radiation and/or cancer-directed surgery	Not recommended	No/Unknown	68	10	No	No	No	No	Dead (attributable to this cancer dx)	4	Dead	One primary only	65	6207938
White	Male	8170	T1	N0	61	No radiation and/or cancer-directed surgery	Surgery performed	No/Unknown	23	20	No	No	No	No	Alive or dead of other cause	19	Alive	One primary only	62	6207947
White	Male	8170	T2	N0	0	No radiation and/or cancer-directed surgery	Not recommended	No/Unknown	32	20	No	No	No	No	Alive or dead of other cause	1	Dead	One primary only	57	6207970
White	Male	8170	T1	N0	0	No radiation and/or cancer-directed surgery	Not recommended	Yes	19	999	No	No	No	No	Alive or dead of other cause	19	Alive	One primary only	74	6207991
White	Male	8170	T1	N0	16	No radiation and/or cancer-directed surgery	Surgery performed	Yes	19	10	No	No	No	No	Alive or dead of other cause	23	Alive	One primary only	63	6208069
Other (American Indian/AK Native, Asian/Pacific Islander)	Male	8170	T1	N0	16	No radiation and/or cancer-directed surgery	Surgery performed	No/Unknown	27	10	No	No	No	No	Alive or dead of other cause	21	Alive	One primary only	59	6208070
Other (American Indian/AK Native, Asian/Pacific Islander)	Female	8170	T3a	N0	0	No radiation and/or cancer-directed surgery	Not recommended	Yes	86	10	No	No	No	No	Dead (attributable to this cancer dx)	5	Dead	One primary only	73	6208588
Other (American Indian/AK Native, Asian/Pacific Islander)	Male	8170	T2	N0	36	No radiation and/or cancer-directed surgery	Surgery performed	No/Unknown	60	20	No	No	No	No	Alive or dead of other cause	17	Alive	One primary only	75	6208709
White	Male	8170	TX	N0	0	No radiation and/or cancer-directed surgery	Not recommended	No/Unknown	93	10	No	No	Yes	No	Dead (attributable to this cancer dx)	5	Dead	One primary only	72	6208860
White	Male	8170	T3a	N0	0	No radiation and/or cancer-directed surgery	Not recommended	No/Unknown	78	10	No	No	No	No	Dead (attributable to this cancer dx)	3	Dead	One primary only	62	6209182
Other (American Indian/AK Native, Asian/Pacific Islander)	Male	8170	T1	N0	16	No radiation and/or cancer-directed surgery	Surgery performed	No/Unknown	23	10	No	No	No	No	Alive or dead of other cause	20	Alive	One primary only	57	6209184
White	Male	8170	T1	N0	16	No radiation and/or cancer-directed surgery	Surgery performed	No/Unknown	30	20	No	No	No	No	Alive or dead of other cause	19	Dead	One primary only	81	6209221
White	Female	8170	T2	N0	0	No radiation and/or cancer-directed surgery	Recommended, unknown if performed	Yes	35	20	No	No	No	No	Alive or dead of other cause	20	Alive	One primary only	64	6209255
White	Male	8170	T3b	N0	0	No radiation and/or cancer-directed surgery	Not recommended	Yes	999	10	Yes	No	No	No	Dead (attributable to this cancer dx)	3	Dead	One primary only	64	6209286
White	Female	8170	T3b	N0	0	No radiation and/or cancer-directed surgery	Not recommended	Yes	177	10	No	No	No	No	Alive or dead of other cause	20	Alive	One primary only	72	6209289
White	Male	8170	T2	N0	0	No radiation and/or cancer-directed surgery	Not recommended	Yes	33	10	No	No	No	No	Dead (attributable to this cancer dx)	16	Dead	One primary only	56	6209402
Other (American Indian/AK Native, Asian/Pacific Islander)	Male	8170	T2	N0	0	No radiation and/or cancer-directed surgery	Recommended but not performed, patient refused	No/Unknown	19	10	No	No	No	No	Alive or dead of other cause	46	Alive	One primary only	63	6209616
Other (American Indian/AK Native, Asian/Pacific Islander)	Male	8170	T3a	N0	0	No radiation and/or cancer-directed surgery	Not recommended	No/Unknown	54	10	No	No	No	No	Dead (attributable to this cancer dx)	0	Dead	One primary only	73	6209674
White	Male	8170	T3a	N1	0	No radiation and/or cancer-directed surgery	Not recommended	Yes	144	10	No	No	No	No	Dead (attributable to this cancer dx)	1	Dead	One primary only	59	6209675
White	Male	8170	T1	N0	16	No radiation and/or cancer-directed surgery	Surgery performed	No/Unknown	22	10	No	No	No	No	Alive or dead of other cause	18	Alive	One primary only	59	6209682
White	Male	8170	T2	N0	0	No radiation and/or cancer-directed surgery	Not recommended	Yes	990	20	No	No	No	No	Alive or dead of other cause	18	Alive	One primary only	60	6209687
White	Male	8170	T2	N0	16	No radiation and/or cancer-directed surgery	Surgery performed	No/Unknown	21	10	No	No	No	No	Alive or dead of other cause	19	Alive	One primary only	55	6209707
White	Male	8170	T2	N0	16	No radiation and/or cancer-directed surgery	Surgery performed	Yes	31	20	No	No	No	No	Alive or dead of other cause	19	Alive	One primary only	51	6209790
Other (American Indian/AK Native, Asian/Pacific Islander)	Female	8170	T1	N0	0	No radiation and/or cancer-directed surgery	Not recommended	No/Unknown	80	10	No	No	No	No	Dead (attributable to this cancer dx)	1	Dead	One primary only	73	6209813
Other (American Indian/AK Native, Asian/Pacific Islander)	Male	8170	T1	N0	0	No radiation and/or cancer-directed surgery	Not recommended	Yes	29	10	No	No	No	No	Alive or dead of other cause	18	Alive	One primary only	62	6209929
White	Male	8170	T1	N0	16	No radiation and/or cancer-directed surgery	Surgery performed	Yes	22	10	No	No	No	No	Alive or dead of other cause	18	Alive	One primary only	65	6209938
White	Female	8170	T1	N0	0	No radiation and/or cancer-directed surgery	Recommended, unknown if performed	Yes	21	10	No	No	No	No	Alive or dead of other cause	18	Alive	One primary only	62	6209941
White	Male	8170	T1	N0	0	No radiation and/or cancer-directed surgery	Not recommended	No/Unknown	17	999	No	No	No	No	Dead (attributable to this cancer dx)	0	Dead	One primary only	68	6210354
White	Male	8170	T1	N0	14	No radiation and/or cancer-directed surgery	Surgery performed	No/Unknown	65	20	No	No	No	No	Alive or dead of other cause	18	Alive	One primary only	61	6210480
Other (American Indian/AK Native, Asian/Pacific Islander)	Male	8170	T3b	N0	0	No radiation and/or cancer-directed surgery	Not recommended	Yes	101	10	No	No	No	No	Dead (attributable to this cancer dx)	9	Dead	One primary only	81	6210594
White	Female	8170	T3b	N1	0	No radiation and/or cancer-directed surgery	Not recommended	Yes	57	10	No	No	No	No	Dead (attributable to this cancer dx)	9	Dead	One primary only	52	6210639
White	Male	8170	T1	N0	0	No radiation and/or cancer-directed surgery	Not recommended	Yes	55	10	No	No	No	No	Dead (attributable to this cancer dx)	4	Dead	One primary only	63	6210811
Other (American Indian/AK Native, Asian/Pacific Islander)	Male	8170	T3a	N0	0	No radiation and/or cancer-directed surgery	Not recommended	No/Unknown	110	999	No	No	No	Yes	Dead (attributable to this cancer dx)	1	Dead	One primary only	82	6210888
White	Male	8170	T2	N0	61	No radiation and/or cancer-directed surgery	Surgery performed	Yes	36	10	No	No	No	No	Alive or dead of other cause	20	Alive	One primary only	56	6211208
Other (American Indian/AK Native, Asian/Pacific Islander)	Male	8170	T1	N0	60	No radiation and/or cancer-directed surgery	Surgery performed	No/Unknown	14	20	No	No	No	No	Alive or dead of other cause	32	Alive	One primary only	63	6211418
Other (American Indian/AK Native, Asian/Pacific Islander)	Male	8170	T2	N0	0	No radiation and/or cancer-directed surgery	Not recommended	Yes	48	10	No	No	No	No	Dead (attributable to this cancer dx)	12	Dead	One primary only	83	6211532
Other (American Indian/AK Native, Asian/Pacific Islander)	Male	8170	T1	N0	23	No radiation and/or cancer-directed surgery	Surgery performed	No/Unknown	18	999	No	No	No	No	Alive or dead of other cause	19	Alive	One primary only	69	6211555
White	Male	8170	T1	N0	0	No radiation and/or cancer-directed surgery	Not recommended	Yes	27	20	No	No	No	No	Alive or dead of other cause	24	Alive	One primary only	75	6211608
Other (American Indian/AK Native, Asian/Pacific Islander)	Female	8170	T1	N0	0	No radiation and/or cancer-directed surgery	Not recommended	Yes	13	10	No	No	No	No	Alive or dead of other cause	20	Alive	One primary only	65	6211684
Other (American Indian/AK Native, Asian/Pacific Islander)	Male	8170	T2	N0	16	No radiation and/or cancer-directed surgery	Surgery performed	Yes	15	20	No	No	No	No	Alive or dead of other cause	17	Alive	One primary only	82	6211798
White	Male	8170	T3b	N0	0	No radiation and/or cancer-directed surgery	Not recommended	Yes	40	20	No	No	No	No	Dead (attributable to this cancer dx)	18	Dead	One primary only	67	6211986
Other (American Indian/AK Native, Asian/Pacific Islander)	Male	8170	T2	N0	0	No radiation and/or cancer-directed surgery	Not recommended	Yes	25	20	No	No	No	No	Alive or dead of other cause	20	Alive	One primary only	82	6212215
Other (American Indian/AK Native, Asian/Pacific Islander)	Female	8170	T1	N0	0	No radiation and/or cancer-directed surgery	Not recommended	No/Unknown	140	20	No	No	No	No	Alive or dead of other cause	0	Dead	One primary only	89	6212245
White	Male	8170	T1	N0	0	No radiation and/or cancer-directed surgery	Not recommended	No/Unknown	60	20	Yes	No	No	Yes	Dead (attributable to this cancer dx)	1	Dead	One primary only	80	6212303
White	Male	8170	T1	N0	16	No radiation and/or cancer-directed surgery	Surgery performed	No/Unknown	30	998	No	No	No	No	Dead (attributable to this cancer dx)	8	Dead	One primary only	63	6212332
White	Male	8170	T1	N0	0	No radiation and/or cancer-directed surgery	Not recommended	Yes	33	20	No	No	No	No	Alive or dead of other cause	20	Alive	1st of 2 or more primaries	64	6212406
White	Female	8170	T3a	N0	0	No radiation and/or cancer-directed surgery	Not recommended	Yes	57	10	No	No	No	No	Alive or dead of other cause	6	Dead	One primary only	78	6212557
White	Male	8170	T1	N0	0	No radiation and/or cancer-directed surgery	Recommended, unknown if performed	Yes	24	10	No	No	No	No	Alive or dead of other cause	20	Alive	One primary only	60	6212645
White	Male	8170	T1	N0	0	No radiation and/or cancer-directed surgery	Not recommended	No/Unknown	70	10	No	No	No	No	Alive or dead of other cause	5	Dead	One primary only	73	6212851
Other (American Indian/AK Native, Asian/Pacific Islander)	Male	8170	T1	N0	16	No radiation and/or cancer-directed surgery	Surgery performed	No/Unknown	18	10	No	No	No	No	Alive or dead of other cause	19	Alive	One primary only	63	6212891
Other (American Indian/AK Native, Asian/Pacific Islander)	Male	8170	T1	N0	0	No radiation and/or cancer-directed surgery	Not recommended	Yes	70	10	No	No	No	No	Dead (attributable to this cancer dx)	16	Dead	One primary only	77	6213130
White	Male	8174	T1	N0	0	No radiation and/or cancer-directed surgery	Not recommended	Yes	53	10	Yes	No	No	No	Dead (attributable to this cancer dx)	16	Dead	One primary only	90	6213136
White	Male	8170	T2	N0	16	No radiation and/or cancer-directed surgery	Surgery performed	No/Unknown	16	20	No	No	No	No	Alive or dead of other cause	10	Dead	One primary only	61	6213256
White	Male	8170	TX	NX	0	No radiation and/or cancer-directed surgery	Not recommended	No/Unknown	999	999	No	No	No	No	Dead (attributable to this cancer dx)	1	Dead	One primary only	68	6213346
White	Male	8170	T3a	N0	0	No radiation and/or cancer-directed surgery	Not recommended	Yes	60	20	No	No	No	No	Alive or dead of other cause	21	Alive	One primary only	70	6213367
White	Male	8170	T3a	N0	0	No radiation and/or cancer-directed surgery	Not recommended	No/Unknown	989	20	No	No	No	No	Dead (attributable to this cancer dx)	8	Dead	One primary only	67	6213452
Other (American Indian/AK Native, Asian/Pacific Islander)	Male	8170	T3a	N0	0	No radiation and/or cancer-directed surgery	Not recommended	Yes	54	20	No	No	No	No	Alive or dead of other cause	18	Alive	One primary only	62	6213526
White	Male	8170	T4	N0	0	No radiation and/or cancer-directed surgery	Not recommended	Yes	85	10	No	No	No	No	Alive or dead of other cause	10	Dead	1st of 2 or more primaries	65	6213659
Other (American Indian/AK Native, Asian/Pacific Islander)	Male	8170	T1	N0	0	No radiation and/or cancer-directed surgery	Not recommended	No/Unknown	74	999	No	No	No	No	Dead (attributable to this cancer dx)	0	Dead	One primary only	76	6213863
White	Male	8170	T4	N0	0	No radiation and/or cancer-directed surgery	Not recommended	No/Unknown	90	10	No	No	No	No	Dead (attributable to this cancer dx)	20	Dead	One primary only	62	6214053
White	Male	8170	T1	N0	0	No radiation and/or cancer-directed surgery	Not recommended	Yes	49	20	No	No	No	No	Alive or dead of other cause	17	Alive	One primary only	55	6214055
White	Male	8170	T2	NX	0	No radiation and/or cancer-directed surgery	Not recommended	No/Unknown	40	999	No	No	No	No	Alive or dead of other cause	22	Alive	One primary only	61	6214216
White	Male	8170	T3a	N0	0	No radiation and/or cancer-directed surgery	Not recommended	Yes	87	10	No	No	No	No	Dead (attributable to this cancer dx)	2	Dead	One primary only	74	6214345
White	Male	8170	T1	N0	0	No radiation and/or cancer-directed surgery	Not recommended	No/Unknown	34	10	No	No	No	No	Dead (attributable to this cancer dx)	1	Dead	One primary only	51	6214355
White	Male	8170	T1	N0	16	No radiation and/or cancer-directed surgery	Surgery performed	No/Unknown	20	20	No	No	No	No	Alive or dead of other cause	16	Alive	One primary only	60	6214415
Other (American Indian/AK Native, Asian/Pacific Islander)	Male	8170	T4	N0	0	No radiation and/or cancer-directed surgery	Not recommended	Yes	105	20	No	No	No	No	Dead (attributable to this cancer dx)	9	Dead	One primary only	63	6214480
Other (American Indian/AK Native, Asian/Pacific Islander)	Male	8170	T1	N0	0	No radiation and/or cancer-directed surgery	Not recommended	Yes	20	20	No	No	No	No	Alive or dead of other cause	19	Alive	One primary only	52	6214602
Other (American Indian/AK Native, Asian/Pacific Islander)	Male	8170	T1	N0	52	No radiation and/or cancer-directed surgery	Surgery performed	No/Unknown	104	20	No	No	No	No	Alive or dead of other cause	20	Alive	One primary only	76	6214651
White	Male	8170	T3a	NX	0	No radiation and/or cancer-directed surgery	Not recommended	Yes	69	10	No	No	No	No	Alive or dead of other cause	17	Alive	One primary only	56	6214704
White	Female	8170	T2	N0	0	No radiation and/or cancer-directed surgery	Not recommended	No/Unknown	173	10	No	No	No	No	Dead (attributable to this cancer dx)	0	Dead	One primary only	61	6214917
Other (American Indian/AK Native, Asian/Pacific Islander)	Female	8170	T1	N0	0	No radiation and/or cancer-directed surgery	Not recommended	Yes	81	10	No	No	No	No	Alive or dead of other cause	26	Alive	One primary only	78	6214919
White	Male	8170	T3NOS	N0	0	No radiation and/or cancer-directed surgery	Not recommended	No/Unknown	66	10	No	No	No	No	Dead (attributable to this cancer dx)	5	Dead	One primary only	60	6214973
White	Male	8170	T2	N0	16	No radiation and/or cancer-directed surgery	Surgery performed	Yes	22	20	No	No	No	No	Alive or dead of other cause	18	Alive	One primary only	67	6215417
White	Male	8170	T1	N0	0	No radiation and/or cancer-directed surgery	Recommended, unknown if performed	Yes	57	20	No	No	No	No	Alive or dead of other cause	18	Alive	One primary only	66	6215426
Other (American Indian/AK Native, Asian/Pacific Islander)	Male	8170	T3a	N0	0	No radiation and/or cancer-directed surgery	Not recommended	Yes	70	20	No	No	No	No	Alive or dead of other cause	18	Alive	One primary only	49	6215745
White	Male	8170	T1	N0	0	No radiation and/or cancer-directed surgery	Not recommended	Yes	31	10	No	No	No	No	Alive or dead of other cause	22	Alive	One primary only	72	6215753
White	Male	8170	T1	N0	36	No radiation and/or cancer-directed surgery	Surgery performed	No/Unknown	55	998	No	No	No	No	Alive or dead of other cause	17	Alive	One primary only	55	6215797
Other (American Indian/AK Native, Asian/Pacific Islander)	Male	8170	T3a	N0	0	No radiation and/or cancer-directed surgery	Not recommended	Yes	60	10	No	No	No	No	Dead (attributable to this cancer dx)	11	Dead	One primary only	71	6215894
Other (American Indian/AK Native, Asian/Pacific Islander)	Female	8170	T1	N0	0	No radiation and/or cancer-directed surgery	Not recommended	Yes	57	999	No	No	No	No	Alive or dead of other cause	17	Alive	One primary only	87	6216152
Other (American Indian/AK Native, Asian/Pacific Islander)	Male	8170	T1	N0	36	No radiation and/or cancer-directed surgery	Surgery performed	No/Unknown	25	20	No	No	No	No	Alive or dead of other cause	15	Alive	One primary only	56	6216241
Other (American Indian/AK Native, Asian/Pacific Islander)	Female	8170	TX	N0	0	No radiation and/or cancer-directed surgery	Not recommended	No/Unknown	999	10	No	No	No	No	Dead (attributable to this cancer dx)	0	Dead	One primary only	90	6216268
White	Male	8170	T3a	N0	0	No radiation and/or cancer-directed surgery	Not recommended	No/Unknown	55	10	No	No	No	No	Dead (attributable to this cancer dx)	6	Dead	One primary only	71	6216270
White	Male	8170	T2	N0	0	No radiation and/or cancer-directed surgery	Not recommended	No/Unknown	46	20	No	No	No	No	Alive or dead of other cause	8	Dead	1st of 2 or more primaries	79	6216336
Black	Male	8170	T3a	N1	0	No radiation and/or cancer-directed surgery	Not recommended	No/Unknown	117	10	No	No	No	No	Dead (attributable to this cancer dx)	2	Dead	One primary only	44	6216364
White	Male	8170	T3a	N0	0	No radiation and/or cancer-directed surgery	Not recommended	No/Unknown	62	10	No	No	No	No	Dead (attributable to this cancer dx)	0	Dead	One primary only	69	6216766
Other (American Indian/AK Native, Asian/Pacific Islander)	Male	8170	T1	N0	0	No radiation and/or cancer-directed surgery	Not recommended	No/Unknown	29	10	No	No	No	No	Dead (attributable to this cancer dx)	0	Dead	One primary only	57	6216801
White	Female	8170	T1	N0	36	No radiation and/or cancer-directed surgery	Surgery performed	No/Unknown	70	10	No	No	No	No	Alive or dead of other cause	14	Alive	One primary only	71	6216831
Other (American Indian/AK Native, Asian/Pacific Islander)	Male	8170	T3a	N0	0	No radiation and/or cancer-directed surgery	Not recommended	No/Unknown	79	10	No	No	No	No	Dead (attributable to this cancer dx)	1	Dead	One primary only	72	6217170
White	Female	8170	T3b	N0	0	No radiation and/or cancer-directed surgery	Not recommended	No/Unknown	118	10	No	No	No	No	Alive or dead of other cause	2	Dead	One primary only	60	6217556
White	Male	8170	T1	N0	0	No radiation and/or cancer-directed surgery	Not recommended	No/Unknown	61	10	No	No	No	No	Dead (attributable to this cancer dx)	7	Dead	One primary only	68	6218042
White	Female	8170	T3a	N0	0	No radiation and/or cancer-directed surgery	Not recommended	Yes	109	10	No	No	No	No	Dead (attributable to this cancer dx)	9	Dead	One primary only	59	6218074
White	Male	8170	T1	N0	16	No radiation and/or cancer-directed surgery	Surgery performed	Yes	23	10	No	No	No	No	Alive or dead of other cause	14	Alive	One primary only	58	6218294
White	Male	8170	T3a	N0	0	No radiation and/or cancer-directed surgery	Not recommended	No/Unknown	73	20	Yes	No	No	No	Dead (attributable to this cancer dx)	11	Dead	1st of 2 or more primaries	62	6218459
White	Male	8170	T1	N0	61	No radiation and/or cancer-directed surgery	Surgery performed	Yes	24	10	No	No	No	No	Alive or dead of other cause	33	Alive	One primary only	50	6218486
White	Male	8170	T2	N1	0	No radiation and/or cancer-directed surgery	Not recommended	Yes	25	10	No	No	No	No	Alive or dead of other cause	18	Alive	One primary only	58	6218497
White	Female	8170	T1	N0	0	No radiation and/or cancer-directed surgery	Not recommended	Yes	19	20	No	No	No	No	Alive or dead of other cause	17	Alive	One primary only	77	6218805
White	Male	8170	T1	N0	16	No radiation and/or cancer-directed surgery	Surgery performed	No/Unknown	14	20	No	No	No	No	Alive or dead of other cause	18	Alive	One primary only	59	6218901
White	Male	8170	T3b	N0	0	No radiation and/or cancer-directed surgery	Not recommended	No/Unknown	999	10	No	No	No	No	Alive or dead of other cause	17	Alive	One primary only	67	6219066
White	Male	8170	T3b	N0	0	No radiation and/or cancer-directed surgery	Not recommended	No/Unknown	48	10	No	No	No	No	Alive or dead of other cause	17	Alive	One primary only	61	6219075
White	Male	8170	T3b	N1	0	No radiation and/or cancer-directed surgery	Not recommended	No/Unknown	50	10	No	No	No	No	Dead (attributable to this cancer dx)	1	Dead	One primary only	71	6219338
White	Female	8170	T1	N0	0	No radiation and/or cancer-directed surgery	Not recommended	No/Unknown	65	999	No	No	No	No	Alive or dead of other cause	0	Dead	One primary only	67	6219375
White	Male	8170	T3b	N0	0	No radiation and/or cancer-directed surgery	Not recommended	No/Unknown	72	10	No	No	No	No	Alive or dead of other cause	2	Dead	One primary only	76	6219552
Other (American Indian/AK Native, Asian/Pacific Islander)	Female	8170	T1	N0	22	No radiation and/or cancer-directed surgery	Surgery performed	No/Unknown	40	10	No	No	No	No	Alive or dead of other cause	16	Alive	One primary only	73	6219679
White	Male	8170	T2	N0	61	No radiation and/or cancer-directed surgery	Surgery performed	Yes	20	20	No	No	No	No	Alive or dead of other cause	18	Alive	One primary only	63	6219691
Other (American Indian/AK Native, Asian/Pacific Islander)	Male	8170	T1	N0	0	No radiation and/or cancer-directed surgery	Not recommended	No/Unknown	11	20	No	No	No	No	Dead (attributable to this cancer dx)	20	Dead	One primary only	60	6219798
Other (American Indian/AK Native, Asian/Pacific Islander)	Male	8170	T1	N0	0	No radiation and/or cancer-directed surgery	Not recommended	Yes	25	20	No	No	No	No	Alive or dead of other cause	16	Alive	One primary only	74	6219811
White	Male	8170	T1	N0	21	No radiation and/or cancer-directed surgery	Surgery performed	No/Unknown	23	20	No	No	No	No	Alive or dead of other cause	16	Alive	One primary only	62	6219814
White	Female	8170	T1	N0	0	No radiation and/or cancer-directed surgery	Not recommended	Yes	41	20	No	No	No	No	Alive or dead of other cause	16	Alive	One primary only	71	6219887
White	Male	8170	T1	N0	0	No radiation and/or cancer-directed surgery	Not recommended	No/Unknown	19	20	No	No	No	No	Alive or dead of other cause	14	Alive	One primary only	72	6220068
Other (American Indian/AK Native, Asian/Pacific Islander)	Male	8170	T1	N0	16	No radiation and/or cancer-directed surgery	Surgery performed	No/Unknown	29	20	No	No	No	No	Alive or dead of other cause	20	Alive	One primary only	77	6220177
Other (American Indian/AK Native, Asian/Pacific Islander)	Female	8170	T1	N0	0	No radiation and/or cancer-directed surgery	Not recommended	No/Unknown	35	10	No	No	No	No	Dead (attributable to this cancer dx)	22	Dead	One primary only	84	6220345
Other (American Indian/AK Native, Asian/Pacific Islander)	Female	8174	T3a	N0	20	No radiation and/or cancer-directed surgery	Surgery performed	No/Unknown	90	10	No	No	No	No	Alive or dead of other cause	15	Alive	One primary only	82	6220708
Other (American Indian/AK Native, Asian/Pacific Islander)	Female	8170	T1	N0	0	No radiation and/or cancer-directed surgery	Not recommended	Yes	10	10	No	No	No	No	Dead (attributable to this cancer dx)	4	Dead	One primary only	76	6220886
Black	Female	8170	T1	N0	0	No radiation and/or cancer-directed surgery	Not recommended	Yes	38	10	No	No	No	No	Alive or dead of other cause	17	Alive	One primary only	71	6221008
White	Female	8170	T1	NX	0	No radiation and/or cancer-directed surgery	Recommended but not performed, patient refused	No/Unknown	88	998	No	No	No	No	Dead (attributable to this cancer dx)	6	Dead	One primary only	97	6221144
Other (American Indian/AK Native, Asian/Pacific Islander)	Male	8170	T3a	N0	0	No radiation and/or cancer-directed surgery	Not recommended	No/Unknown	116	20	No	No	No	No	Dead (attributable to this cancer dx)	0	Dead	One primary only	62	6221225
White	Male	8170	T1	N0	23	No radiation and/or cancer-directed surgery	Surgery performed	No/Unknown	32	20	No	No	No	No	Alive or dead of other cause	16	Alive	One primary only	77	6221353
White	Female	8170	T1	N0	0	No radiation and/or cancer-directed surgery	Not recommended	Yes	34	20	No	No	No	No	Dead (attributable to this cancer dx)	6	Dead	One primary only	66	6222048
White	Female	8170	T1	N0	37	No radiation and/or cancer-directed surgery	Surgery performed	No/Unknown	23	10	No	No	No	No	Alive or dead of other cause	16	Alive	One primary only	83	6222078
Black	Male	8170	T2	N0	16	No radiation and/or cancer-directed surgery	Surgery performed	Yes	18	10	No	No	No	No	Alive or dead of other cause	14	Alive	One primary only	59	6222210
Other (American Indian/AK Native, Asian/Pacific Islander)	Female	8170	T2	N0	0	No radiation and/or cancer-directed surgery	Not recommended	No/Unknown	120	10	No	No	No	No	Dead (attributable to this cancer dx)	2	Dead	One primary only	92	6222241
Black	Male	8170	T1	N0	0	No radiation and/or cancer-directed surgery	Not recommended	Yes	52	10	No	No	No	No	Dead (attributable to this cancer dx)	16	Dead	One primary only	66	6222343
White	Male	8170	T2	N0	0	No radiation and/or cancer-directed surgery	Not recommended	Yes	20	10	No	No	No	No	Alive or dead of other cause	15	Alive	One primary only	57	6222346
Other (American Indian/AK Native, Asian/Pacific Islander)	Male	8170	T1	N0	16	No radiation and/or cancer-directed surgery	Surgery performed	Yes	44	998	No	No	No	No	Alive or dead of other cause	15	Alive	One primary only	63	6222362
Black	Male	8170	T1	N0	0	No radiation and/or cancer-directed surgery	Not recommended	No/Unknown	10	10	No	No	No	No	Alive or dead of other cause	13	Alive	One primary only	54	6222365
Other (American Indian/AK Native, Asian/Pacific Islander)	Female	8170	T4	N0	51	No radiation and/or cancer-directed surgery	Surgery performed	No/Unknown	75	20	No	No	No	No	Alive or dead of other cause	16	Alive	One primary only	72	6222670
White	Male	8170	T3b	N0	0	No radiation and/or cancer-directed surgery	Not recommended	No/Unknown	989	10	No	No	No	Yes	Dead (attributable to this cancer dx)	1	Dead	One primary only	59	6222819
Black	Male	8170	T1	N0	0	No radiation and/or cancer-directed surgery	Not recommended	Yes	18	20	No	No	No	No	Dead (attributable to this cancer dx)	4	Dead	One primary only	62	6222871
White	Female	8170	T3b	N0	0	No radiation and/or cancer-directed surgery	Not recommended	Yes	999	10	Yes	No	No	Yes	Dead (attributable to this cancer dx)	0	Dead	One primary only	64	6222987
White	Female	8170	T1	N0	22	No radiation and/or cancer-directed surgery	Surgery performed	No/Unknown	108	998	No	No	No	No	Alive or dead of other cause	14	Alive	One primary only	80	6222996
White	Female	8170	T1	N0	24	No radiation and/or cancer-directed surgery	Surgery performed	No/Unknown	55	10	No	No	No	No	Alive or dead of other cause	15	Alive	One primary only	62	6223130
Other (American Indian/AK Native, Asian/Pacific Islander)	Male	8170	T1	N0	0	No radiation and/or cancer-directed surgery	Not recommended, contraindicated due to other cond; autopsy only (1973-2002)	No/Unknown	104	10	No	No	No	No	Dead (attributable to this cancer dx)	3	Dead	One primary only	84	6223142
Other (American Indian/AK Native, Asian/Pacific Islander)	Male	8170	T3b	N0	0	No radiation and/or cancer-directed surgery	Not recommended	Yes	160	10	No	No	No	No	Dead (attributable to this cancer dx)	1	Dead	One primary only	35	6223145
Other (American Indian/AK Native, Asian/Pacific Islander)	Female	8170	T1	N0	0	No radiation and/or cancer-directed surgery	Not recommended	Yes	19	10	No	No	No	No	Alive or dead of other cause	14	Alive	One primary only	66	6223174
White	Male	8170	T1	N0	0	No radiation and/or cancer-directed surgery	Not recommended	Yes	30	20	No	No	No	No	Alive or dead of other cause	13	Alive	One primary only	65	6223179
Other (American Indian/AK Native, Asian/Pacific Islander)	Male	8170	T2	N0	0	No radiation and/or cancer-directed surgery	Not recommended	Yes	25	20	No	No	No	No	Dead (attributable to this cancer dx)	12	Dead	One primary only	65	6223220
White	Female	8170	T4	N0	0	No radiation and/or cancer-directed surgery	Not recommended	Yes	94	20	No	No	No	Yes	Dead (attributable to this cancer dx)	2	Dead	One primary only	72	6223516
Other (American Indian/AK Native, Asian/Pacific Islander)	Female	8170	TX	N0	0	No radiation and/or cancer-directed surgery	Not recommended	No/Unknown	999	10	No	No	No	No	Dead (attributable to this cancer dx)	1	Dead	One primary only	83	6223543
White	Male	8170	T2	N0	36	No radiation and/or cancer-directed surgery	Surgery performed	No/Unknown	45	20	No	No	No	No	Alive or dead of other cause	15	Alive	One primary only	64	6223672
Black	Male	8170	T1	N0	0	No radiation and/or cancer-directed surgery	Not recommended, contraindicated due to other cond; autopsy only (1973-2002)	Yes	44	10	No	No	No	No	Alive or dead of other cause	18	Alive	One primary only	76	6223878
White	Male	8170	T1	N0	0	No radiation and/or cancer-directed surgery	Not recommended	No/Unknown	33	999	No	No	No	No	Dead (attributable to this cancer dx)	3	Dead	One primary only	49	6224052
Other (American Indian/AK Native, Asian/Pacific Islander)	Female	8170	T1	N0	16	No radiation and/or cancer-directed surgery	Surgery performed	Yes	24	10	No	No	No	No	Alive or dead of other cause	18	Alive	One primary only	66	6224075
Other (American Indian/AK Native, Asian/Pacific Islander)	Male	8170	T1	N0	23	No radiation and/or cancer-directed surgery	Surgery performed	No/Unknown	18	20	No	No	No	No	Alive or dead of other cause	17	Alive	One primary only	48	6224242
White	Male	8170	T1	NX	0	No radiation and/or cancer-directed surgery	Not recommended	No/Unknown	999	999	No	No	No	No	Dead (attributable to this cancer dx)	1	Dead	One primary only	68	6224443
Other (American Indian/AK Native, Asian/Pacific Islander)	Female	8170	T1	N0	30	No radiation and/or cancer-directed surgery	Surgery performed	No/Unknown	75	20	No	No	No	No	Alive or dead of other cause	15	Alive	One primary only	77	6224460
White	Male	8170	T2	N0	61	No radiation and/or cancer-directed surgery	Surgery performed	Yes	30	10	No	No	No	No	Alive or dead of other cause	14	Alive	One primary only	58	6224631
White	Male	8170	T3a	N1	0	No radiation and/or cancer-directed surgery	Not recommended	Yes	83	20	No	No	No	No	Alive or dead of other cause	14	Alive	One primary only	61	6224633
White	Female	8170	T1	N0	60	No radiation and/or cancer-directed surgery	Surgery performed	No/Unknown	28	20	No	No	No	No	Alive or dead of other cause	13	Alive	One primary only	68	6224760
White	Male	8170	T3a	N0	0	No radiation and/or cancer-directed surgery	Not recommended	Yes	69	10	No	No	No	No	Alive or dead of other cause	7	Alive	One primary only	68	6224874
White	Female	8170	T1	N0	0	No radiation and/or cancer-directed surgery	Not recommended	No/Unknown	29	10	No	No	No	No	Alive or dead of other cause	1	Dead	One primary only	56	6224937
White	Male	8170	T3a	N0	0	No radiation and/or cancer-directed surgery	Not recommended	Yes	125	20	No	No	No	No	Alive or dead of other cause	22	Alive	One primary only	60	6224939
Other (American Indian/AK Native, Asian/Pacific Islander)	Female	8170	T2	N1	51	No radiation and/or cancer-directed surgery	Surgery performed	No/Unknown	170	10	No	No	No	No	Alive or dead of other cause	14	Alive	One primary only	61	6225151
White	Female	8170	T2	N0	0	No radiation and/or cancer-directed surgery	Not recommended	Yes	22	20	No	No	No	No	Alive or dead of other cause	15	Alive	One primary only	65	6225192
White	Male	8170	TX	N0	0	No radiation and/or cancer-directed surgery	Not recommended	Yes	16	10	No	No	No	No	Alive or dead of other cause	17	Alive	One primary only	53	6225317
White	Male	8170	T3a	N0	0	No radiation and/or cancer-directed surgery	Not recommended	No/Unknown	80	10	No	No	No	No	Dead (attributable to this cancer dx)	1	Dead	One primary only	63	6225376
Other (American Indian/AK Native, Asian/Pacific Islander)	Male	8170	T1	N0	16	No radiation and/or cancer-directed surgery	Surgery performed	Yes	46	998	No	No	No	No	Alive or dead of other cause	12	Alive	One primary only	56	6225443
Black	Male	8170	T1	N0	37	No radiation and/or cancer-directed surgery	Surgery performed	No/Unknown	38	20	No	No	No	No	Alive or dead of other cause	16	Alive	One primary only	66	6225594
White	Male	8170	T2	N0	22	No radiation and/or cancer-directed surgery	Surgery performed	No/Unknown	40	20	No	No	No	No	Alive or dead of other cause	14	Alive	One primary only	62	6225614
White	Female	8170	T2	N0	61	No radiation and/or cancer-directed surgery	Surgery performed	No/Unknown	21	998	No	No	No	No	Alive or dead of other cause	14	Alive	1st of 2 or more primaries	71	6225670
White	Female	8170	TX	N0	0	No radiation and/or cancer-directed surgery	Not recommended	No/Unknown	999	998	No	No	No	No	Dead (attributable to this cancer dx)	0	Dead	One primary only	88	6225892
White	Male	8170	T1	N0	16	No radiation and/or cancer-directed surgery	Surgery performed	Yes	23	999	No	No	No	No	Alive or dead of other cause	23	Alive	One primary only	71	6225904
White	Male	8170	T2	N0	0	No radiation and/or cancer-directed surgery	Not recommended	No/Unknown	22	20	No	No	No	No	Dead (attributable to this cancer dx)	1	Dead	One primary only	71	6225919
White	Male	8170	T2	N0	25	Radiation prior to surgery	Surgery performed	Yes	60	10	No	No	No	No	Alive or dead of other cause	14	Alive	One primary only	68	6226112
Other (American Indian/AK Native, Asian/Pacific Islander)	Female	8174	T3b	N0	0	No radiation and/or cancer-directed surgery	Not recommended	No/Unknown	158	10	No	No	No	No	Dead (attributable to this cancer dx)	1	Dead	One primary only	53	6226819
Other (American Indian/AK Native, Asian/Pacific Islander)	Male	8170	T1	N0	16	No radiation and/or cancer-directed surgery	Surgery performed	No/Unknown	20	20	No	No	No	No	Alive or dead of other cause	13	Alive	One primary only	61	6226852
Other (American Indian/AK Native, Asian/Pacific Islander)	Male	8170	T3a	N0	0	No radiation and/or cancer-directed surgery	Not recommended	No/Unknown	88	10	No	No	No	No	Dead (attributable to this cancer dx)	0	Dead	One primary only	53	6226898
Other (American Indian/AK Native, Asian/Pacific Islander)	Male	8170	T4	N0	0	No radiation and/or cancer-directed surgery	Not recommended	No/Unknown	27	10	No	No	No	No	Dead (attributable to this cancer dx)	0	Dead	One primary only	41	6226914
Other (American Indian/AK Native, Asian/Pacific Islander)	Female	8170	T1	N0	16	No radiation and/or cancer-directed surgery	Surgery performed	No/Unknown	28	10	No	No	No	No	Alive or dead of other cause	13	Alive	One primary only	74	6226921
White	Male	8170	T3a	N0	0	No radiation and/or cancer-directed surgery	Not recommended	Yes	67	10	No	No	No	No	Dead (attributable to this cancer dx)	6	Dead	One primary only	64	6227120
Other (American Indian/AK Native, Asian/Pacific Islander)	Female	8170	T4	N1	0	No radiation and/or cancer-directed surgery	Not recommended	No/Unknown	63	10	No	No	No	No	Alive or dead of other cause	0	Alive	One primary only	72	6227215
White	Male	8170	T1	N0	0	No radiation and/or cancer-directed surgery	Not recommended	No/Unknown	28	10	No	No	No	No	Alive or dead of other cause	16	Alive	One primary only	58	6227255
Other (American Indian/AK Native, Asian/Pacific Islander)	Male	8170	T2	N0	0	No radiation and/or cancer-directed surgery	Not recommended	Yes	28	20	No	No	No	No	Alive or dead of other cause	14	Alive	One primary only	57	6227303
Other (American Indian/AK Native, Asian/Pacific Islander)	Male	8170	T2	N0	0	No radiation and/or cancer-directed surgery	Not recommended	Yes	24	20	No	No	No	No	Alive or dead of other cause	19	Alive	One primary only	64	6227306
Black	Male	8170	T2	N0	0	No radiation and/or cancer-directed surgery	Not recommended	No/Unknown	19	20	No	No	No	No	Alive or dead of other cause	9	Alive	One primary only	58	6227313
Other (American Indian/AK Native, Asian/Pacific Islander)	Female	8170	T1	N0	0	No radiation and/or cancer-directed surgery	Not recommended	Yes	22	10	No	No	No	No	Alive or dead of other cause	14	Alive	One primary only	61	6227315
White	Male	8170	T2	N0	0	No radiation and/or cancer-directed surgery	Not recommended	Yes	18	10	No	No	No	No	Alive or dead of other cause	18	Alive	One primary only	72	6227597
Other (American Indian/AK Native, Asian/Pacific Islander)	Male	8170	T1	N0	0	No radiation and/or cancer-directed surgery	Not recommended	No/Unknown	47	10	No	No	No	No	Alive or dead of other cause	25	Alive	One primary only	61	6227625
White	Male	8170	TX	N0	0	No radiation and/or cancer-directed surgery	Not recommended	No/Unknown	999	10	No	No	No	Yes	Dead (attributable to this cancer dx)	0	Dead	One primary only	84	6227740
White	Male	8170	T2	N0	0	No radiation and/or cancer-directed surgery	Not recommended	No/Unknown	15	10	No	No	No	No	Alive or dead of other cause	17	Alive	One primary only	58	6227979
White	Female	8170	T1	NX	0	No radiation and/or cancer-directed surgery	Not recommended	No/Unknown	43	10	No	No	No	No	Dead (attributable to this cancer dx)	2	Dead	One primary only	79	6228126
White	Male	8170	T1	N1	0	No radiation and/or cancer-directed surgery	Not recommended	No/Unknown	999	10	No	No	No	No	Dead (attributable to this cancer dx)	0	Dead	One primary only	67	6228143
Other (American Indian/AK Native, Asian/Pacific Islander)	Male	8170	TX	NX	0	No radiation and/or cancer-directed surgery	Not recommended	No/Unknown	999	10	No	No	Yes	No	Dead (attributable to this cancer dx)	0	Dead	One primary only	69	6228178
White	Male	8170	T1	N0	0	No radiation and/or cancer-directed surgery	Not recommended	No/Unknown	11	20	No	No	No	No	Alive or dead of other cause	34	Alive	One primary only	58	6228211
White	Male	8170	T1	N0	0	No radiation and/or cancer-directed surgery	Recommended, unknown if performed	Yes	23	10	No	No	No	No	Alive or dead of other cause	15	Alive	One primary only	57	6228624
White	Male	8170	T1	N0	0	No radiation and/or cancer-directed surgery	Not recommended	No/Unknown	999	10	No	No	No	No	Dead (attributable to this cancer dx)	0	Dead	One primary only	75	6228698
White	Male	8170	T1	N0	23	No radiation and/or cancer-directed surgery	Surgery performed	No/Unknown	30	10	No	No	No	No	Alive or dead of other cause	14	Alive	One primary only	63	6228741
Other (American Indian/AK Native, Asian/Pacific Islander)	Male	8170	T3b	N0	0	No radiation and/or cancer-directed surgery	Not recommended	No/Unknown	74	20	No	No	No	No	Dead (attributable to this cancer dx)	4	Dead	One primary only	56	6228780
Black	Female	8170	T2	N1	0	No radiation and/or cancer-directed surgery	Not recommended	No/Unknown	60	10	Yes	No	No	No	Dead (attributable to this cancer dx)	0	Dead	One primary only	66	6228885
White	Male	8170	T1	N0	61	No radiation and/or cancer-directed surgery	Surgery performed	Yes	60	999	No	No	No	No	Alive or dead of other cause	15	Alive	One primary only	60	6228965
Other (American Indian/AK Native, Asian/Pacific Islander)	Male	8170	T3a	N0	0	No radiation and/or cancer-directed surgery	Not recommended	Yes	60	20	No	No	No	No	Alive or dead of other cause	14	Alive	One primary only	69	6228971
White	Male	8170	T2	N0	0	No radiation and/or cancer-directed surgery	Not recommended	Yes	31	20	No	No	No	No	Alive or dead of other cause	15	Alive	One primary only	61	6229013
White	Male	8170	T1	N1	0	No radiation and/or cancer-directed surgery	Not recommended	Yes	26	10	No	No	No	No	Alive or dead of other cause	27	Alive	One primary only	52	6229218
White	Male	8170	T2	N0	0	No radiation and/or cancer-directed surgery	Not recommended	No/Unknown	36	20	No	No	No	No	Alive or dead of other cause	4	Alive	One primary only	64	6229324
White	Female	8170	T1	N0	26	No radiation and/or cancer-directed surgery	Surgery performed	Yes	180	10	No	No	No	No	Dead (attributable to this cancer dx)	10	Dead	One primary only	46	6229340
Black	Male	8170	T1	N0	16	No radiation and/or cancer-directed surgery	Surgery performed	No/Unknown	30	10	No	No	No	No	Alive or dead of other cause	12	Alive	One primary only	61	6229394
Other (American Indian/AK Native, Asian/Pacific Islander)	Male	8170	TX	N0	0	No radiation and/or cancer-directed surgery	Not recommended	No/Unknown	999	999	No	No	No	No	Dead (attributable to this cancer dx)	3	Dead	One primary only	66	6229511
Black	Male	8170	T1	N0	0	No radiation and/or cancer-directed surgery	Not recommended	No/Unknown	92	10	No	No	No	No	Dead (attributable to this cancer dx)	2	Dead	One primary only	61	6229548
White	Male	8170	T3b	N1	0	No radiation and/or cancer-directed surgery	Not recommended	Yes	42	10	No	No	No	No	Dead (attributable to this cancer dx)	12	Dead	One primary only	49	6229613
White	Female	8170	TX	N0	0	No radiation and/or cancer-directed surgery	Not recommended	Yes	999	10	No	No	No	No	Alive or dead of other cause	3	Alive	One primary only	66	6229715
Other (American Indian/AK Native, Asian/Pacific Islander)	Male	8170	T1	N0	0	No radiation and/or cancer-directed surgery	Not recommended	Yes	999	999	No	No	No	No	Alive or dead of other cause	16	Alive	One primary only	70	6229745
Other (American Indian/AK Native, Asian/Pacific Islander)	Male	8170	T1	N0	0	No radiation and/or cancer-directed surgery	Not recommended	No/Unknown	13	20	No	No	No	No	Alive or dead of other cause	6	Alive	One primary only	45	6229747
Black	Female	8170	T1	N0	0	No radiation and/or cancer-directed surgery	Not recommended	No/Unknown	18	10	No	No	No	No	Alive or dead of other cause	1	Dead	One primary only	62	6230245
White	Male	8170	T3a	N0	0	No radiation and/or cancer-directed surgery	Not recommended	No/Unknown	139	10	No	No	No	No	Dead (attributable to this cancer dx)	8	Dead	One primary only	67	6230255
Other (American Indian/AK Native, Asian/Pacific Islander)	Male	8170	T2	N0	0	No radiation and/or cancer-directed surgery	Not recommended	Yes	26	20	No	No	No	No	Alive or dead of other cause	15	Alive	One primary only	57	6230293
White	Male	8170	T2	N0	0	No radiation and/or cancer-directed surgery	Not recommended	Yes	44	10	No	No	No	No	Alive or dead of other cause	15	Alive	One primary only	60	6230296
White	Male	8170	T1	N0	0	No radiation and/or cancer-directed surgery	Not recommended	Yes	27	10	No	No	No	No	Alive or dead of other cause	13	Alive	One primary only	69	6230402
White	Male	8170	T2	N0	61	No radiation and/or cancer-directed surgery	Surgery performed	Yes	29	20	No	No	No	No	Alive or dead of other cause	17	Alive	One primary only	69	6230459
Other (American Indian/AK Native, Asian/Pacific Islander)	Male	8170	T2	N0	0	No radiation and/or cancer-directed surgery	Not recommended	Yes	29	20	No	No	No	No	Alive or dead of other cause	13	Alive	One primary only	57	6230510
Other (American Indian/AK Native, Asian/Pacific Islander)	Male	8170	T2	N0	0	No radiation and/or cancer-directed surgery	Not recommended	Yes	36	20	No	No	No	No	Alive or dead of other cause	16	Alive	One primary only	53	6230519
White	Male	8170	TX	NX	0	No radiation and/or cancer-directed surgery	Not recommended	No/Unknown	999	10	No	No	No	No	Dead (attributable to this cancer dx)	7	Dead	One primary only	68	6230577
White	Male	8170	TX	N0	0	No radiation and/or cancer-directed surgery	Not recommended	No/Unknown	999	999	No	No	No	No	Dead (attributable to this cancer dx)	9	Dead	One primary only	53	6230631
Black	Male	8170	T3a	N0	23	No radiation and/or cancer-directed surgery	Surgery performed	No/Unknown	130	10	No	No	No	No	Alive or dead of other cause	12	Alive	One primary only	66	6230772
Black	Male	8171	T1	N0	0	No radiation and/or cancer-directed surgery	Not recommended	Yes	163	998	No	No	No	No	Alive or dead of other cause	13	Alive	One primary only	67	6230800
Other (American Indian/AK Native, Asian/Pacific Islander)	Male	8170	T3a	N0	0	No radiation and/or cancer-directed surgery	Not recommended	No/Unknown	205	10	No	No	No	Yes	Dead (attributable to this cancer dx)	1	Dead	One primary only	73	6230812
Other (American Indian/AK Native, Asian/Pacific Islander)	Female	8170	T2	N0	0	No radiation and/or cancer-directed surgery	Not recommended	No/Unknown	42	20	No	No	Yes	Yes	Dead (attributable to this cancer dx)	3	Dead	One primary only	64	6230918
Black	Male	8170	T3b	N1	0	No radiation and/or cancer-directed surgery	Not recommended	No/Unknown	999	10	No	No	No	No	Dead (attributable to this cancer dx)	0	Dead	One primary only	61	6230957
White	Male	8170	T3b	N0	0	No radiation and/or cancer-directed surgery	Not recommended	No/Unknown	180	10	No	No	No	No	Dead (attributable to this cancer dx)	1	Dead	One primary only	75	6231028
White	Male	8170	T1	N1	0	No radiation and/or cancer-directed surgery	Not recommended	Yes	999	10	Yes	No	No	No	Dead (attributable to this cancer dx)	6	Dead	One primary only	77	6231132
Other (American Indian/AK Native, Asian/Pacific Islander)	Male	8170	T3a	N0	0	No radiation and/or cancer-directed surgery	Not recommended	No/Unknown	52	10	No	No	No	No	Dead (attributable to this cancer dx)	0	Dead	One primary only	79	6231452
White	Male	8170	T2	N0	0	No radiation and/or cancer-directed surgery	Not recommended	Yes	16	10	No	No	No	No	Alive or dead of other cause	13	Alive	One primary only	61	6231502
White	Male	8170	T1	N0	0	No radiation and/or cancer-directed surgery	Not recommended	Yes	999	10	No	No	No	No	Alive or dead of other cause	2	Dead	One primary only	56	6231503
Other (American Indian/AK Native, Asian/Pacific Islander)	Male	8170	T3b	N0	0	No radiation and/or cancer-directed surgery	Not recommended	No/Unknown	110	10	Yes	No	No	Yes	Dead (attributable to this cancer dx)	0	Dead	One primary only	83	6231516
White	Male	8170	T3b	N0	0	No radiation and/or cancer-directed surgery	Not recommended	No/Unknown	999	10	No	No	No	No	Dead (attributable to this cancer dx)	0	Dead	One primary only	57	6231526
White	Male	8170	T1	N0	15	No radiation and/or cancer-directed surgery	Surgery performed	No/Unknown	22	20	No	No	No	No	Alive or dead of other cause	14	Alive	One primary only	62	6231672
Other (American Indian/AK Native, Asian/Pacific Islander)	Male	8170	T1	N1	0	No radiation and/or cancer-directed surgery	Not recommended	Yes	65	20	No	No	No	No	Dead (attributable to this cancer dx)	4	Dead	One primary only	61	6231768
White	Male	8170	T2	N0	0	No radiation and/or cancer-directed surgery	Not recommended	Yes	45	20	No	No	No	No	Alive or dead of other cause	11	Alive	One primary only	70	6231876
Other (American Indian/AK Native, Asian/Pacific Islander)	Male	8170	T3a	NX	0	No radiation and/or cancer-directed surgery	Not recommended	Yes	220	10	No	No	No	Yes	Dead (attributable to this cancer dx)	5	Dead	One primary only	46	6232173
Other (American Indian/AK Native, Asian/Pacific Islander)	Female	8170	T1	N0	22	No radiation and/or cancer-directed surgery	Surgery performed	No/Unknown	55	20	No	No	No	No	Alive or dead of other cause	13	Alive	One primary only	71	6232185
Other (American Indian/AK Native, Asian/Pacific Islander)	Female	8170	T3b	N0	0	No radiation and/or cancer-directed surgery	Not recommended	Yes	100	10	No	No	No	No	Dead (attributable to this cancer dx)	2	Dead	One primary only	52	6232227
White	Male	8170	T1	N0	0	No radiation and/or cancer-directed surgery	Not recommended	No/Unknown	14	10	No	No	No	No	Dead (attributable to this cancer dx)	22	Dead	One primary only	83	6232308
Other (American Indian/AK Native, Asian/Pacific Islander)	Male	8170	T2	N0	30	No radiation and/or cancer-directed surgery	Surgery performed	No/Unknown	45	10	No	No	No	No	Alive or dead of other cause	15	Alive	One primary only	61	6232431
White	Male	8170	T1	N0	0	No radiation and/or cancer-directed surgery	Not recommended	No/Unknown	14	10	No	No	No	No	Alive or dead of other cause	12	Alive	One primary only	55	6232435
Other (American Indian/AK Native, Asian/Pacific Islander)	Male	8170	TX	N0	0	No radiation and/or cancer-directed surgery	Not recommended	Yes	999	999	Yes	No	No	No	Alive or dead of other cause	43	Alive	One primary only	61	6232590
White	Male	8170	T2	N0	0	No radiation and/or cancer-directed surgery	Not recommended, contraindicated due to other cond; autopsy only (1973-2002)	No/Unknown	29	20	No	No	No	No	Dead (attributable to this cancer dx)	1	Dead	One primary only	55	6232773
Other (American Indian/AK Native, Asian/Pacific Islander)	Male	8170	T2	N0	0	No radiation and/or cancer-directed surgery	Not recommended	Yes	31	10	No	No	No	No	Alive or dead of other cause	12	Alive	One primary only	62	6232775
White	Male	8170	T3b	N0	0	No radiation and/or cancer-directed surgery	Not recommended	No/Unknown	999	999	No	No	No	No	Dead (attributable to this cancer dx)	0	Dead	One primary only	56	6232776
Other (American Indian/AK Native, Asian/Pacific Islander)	Male	8170	T1	N0	51	No radiation and/or cancer-directed surgery	Surgery performed	No/Unknown	72	10	No	No	No	No	Alive or dead of other cause	13	Alive	One primary only	34	6232781
White	Male	8174	T1	N0	0	No radiation and/or cancer-directed surgery	Not recommended	No/Unknown	131	10	No	No	No	No	Dead (attributable to this cancer dx)	3	Dead	One primary only	89	6232816
White	Male	8170	T1	N0	0	No radiation and/or cancer-directed surgery	Not recommended	No/Unknown	66	998	No	No	No	Yes	Dead (attributable to this cancer dx)	9	Dead	One primary only	67	6232821
White	Female	8170	T1	N0	61	No radiation and/or cancer-directed surgery	Surgery performed	No/Unknown	10	20	No	No	No	No	Alive or dead of other cause	12	Alive	One primary only	60	6233207
White	Female	8170	T2	N0	16	No radiation and/or cancer-directed surgery	Surgery performed	Yes	24	10	No	No	No	No	Alive or dead of other cause	13	Alive	One primary only	65	6233298
White	Male	8170	T1	N0	0	No radiation and/or cancer-directed surgery	Not recommended	Yes	20	10	No	No	No	No	Alive or dead of other cause	15	Alive	One primary only	70	6233329
Other (American Indian/AK Native, Asian/Pacific Islander)	Male	8170	T3b	N0	0	No radiation and/or cancer-directed surgery	Not recommended	No/Unknown	73	10	Yes	No	No	No	Alive or dead of other cause	0	Alive	One primary only	74	6233332
White	Male	8170	T3b	N0	0	No radiation and/or cancer-directed surgery	Not recommended	Yes	45	20	No	No	No	No	Alive or dead of other cause	13	Alive	One primary only	50	6233389
White	Female	8170	T1	N0	0	No radiation and/or cancer-directed surgery	Not recommended	Yes	58	20	No	No	No	No	Alive or dead of other cause	11	Alive	One primary only	77	6233578
White	Male	8170	T1	N0	0	No radiation and/or cancer-directed surgery	Not recommended	No/Unknown	999	20	No	No	No	No	Dead (attributable to this cancer dx)	10	Dead	One primary only	82	6233810
White	Male	8170	T1	N0	0	No radiation and/or cancer-directed surgery	Not recommended	Yes	45	10	No	No	No	No	Alive or dead of other cause	17	Alive	One primary only	56	6234040
White	Male	8170	T1	N0	0	No radiation and/or cancer-directed surgery	Not recommended	No/Unknown	6	10	No	No	No	No	Alive or dead of other cause	17	Alive	One primary only	62	6234042
Black	Male	8170	T3a	N0	0	No radiation and/or cancer-directed surgery	Not recommended	Yes	84	10	No	No	No	No	Alive or dead of other cause	11	Alive	One primary only	62	6234236
White	Male	8170	T1	N0	23	No radiation and/or cancer-directed surgery	Surgery performed	Yes	42	10	No	No	No	No	Alive or dead of other cause	11	Alive	One primary only	58	6234299
Black	Male	8170	T2	N0	0	No radiation and/or cancer-directed surgery	Not recommended	No/Unknown	20	10	No	No	No	No	Dead (attributable to this cancer dx)	8	Dead	One primary only	64	6234327
Other (American Indian/AK Native, Asian/Pacific Islander)	Male	8170	T2	N0	0	No radiation and/or cancer-directed surgery	Not recommended	Yes	45	10	No	No	No	No	Dead (attributable to this cancer dx)	6	Dead	One primary only	66	6234331
White	Male	8170	T1	N0	16	No radiation and/or cancer-directed surgery	Surgery performed	No/Unknown	10	20	No	No	No	No	Alive or dead of other cause	11	Alive	One primary only	67	6234339
Other (American Indian/AK Native, Asian/Pacific Islander)	Male	8170	T1	N0	0	No radiation and/or cancer-directed surgery	Not recommended	Yes	61	10	No	No	No	No	Alive or dead of other cause	12	Alive	One primary only	54	6234348
Other (American Indian/AK Native, Asian/Pacific Islander)	Male	8170	T4	N0	0	No radiation and/or cancer-directed surgery	Not recommended	No/Unknown	999	10	No	No	No	No	Dead (attributable to this cancer dx)	1	Dead	One primary only	58	6234368
Other (American Indian/AK Native, Asian/Pacific Islander)	Male	8170	T1	N0	0	No radiation and/or cancer-directed surgery	Recommended, unknown if performed	Yes	30	10	No	No	No	No	Alive or dead of other cause	17	Alive	One primary only	62	6234512
Other (American Indian/AK Native, Asian/Pacific Islander)	Female	8170	T1	N0	0	No radiation and/or cancer-directed surgery	Not recommended	No/Unknown	80	10	No	No	No	No	Alive or dead of other cause	16	Alive	One primary only	86	6234513
Other (American Indian/AK Native, Asian/Pacific Islander)	Male	8170	T1	N0	0	No radiation and/or cancer-directed surgery	Not recommended	Yes	41	10	No	No	No	No	Alive or dead of other cause	14	Alive	One primary only	52	6234586
Other (American Indian/AK Native, Asian/Pacific Islander)	Female	8170	T3a	N0	0	No radiation and/or cancer-directed surgery	Not recommended	No/Unknown	58	10	No	No	No	No	Dead (attributable to this cancer dx)	0	Dead	One primary only	94	6234588
Other (American Indian/AK Native, Asian/Pacific Islander)	Female	8170	T1	N0	0	No radiation and/or cancer-directed surgery	Not recommended	Yes	16	10	No	No	No	No	Alive or dead of other cause	13	Alive	One primary only	76	6234693
White	Male	8170	TX	NX	0	No radiation and/or cancer-directed surgery	Not recommended	No/Unknown	999	999	No	No	No	Yes	Dead (attributable to this cancer dx)	1	Dead	One primary only	42	6234869
Black	Male	8170	T3b	N0	0	No radiation and/or cancer-directed surgery	Not recommended	No/Unknown	170	999	No	No	No	Yes	Dead (attributable to this cancer dx)	0	Dead	One primary only	62	6234870
Other (American Indian/AK Native, Asian/Pacific Islander)	Female	8170	T1	N0	0	No radiation and/or cancer-directed surgery	Not recommended	Yes	69	20	No	No	No	No	Alive or dead of other cause	13	Alive	One primary only	66	6234874
White	Female	8170	T3b	N0	0	No radiation and/or cancer-directed surgery	Not recommended	No/Unknown	84	20	No	No	No	Yes	Dead (attributable to this cancer dx)	5	Dead	One primary only	73	6234918
Other (American Indian/AK Native, Asian/Pacific Islander)	Male	8170	T1	N0	30	No radiation and/or cancer-directed surgery	Surgery performed	No/Unknown	52	10	No	No	No	No	Alive or dead of other cause	10	Alive	One primary only	57	6234955
White	Male	8170	T3b	N0	0	No radiation and/or cancer-directed surgery	Not recommended	No/Unknown	117	10	No	No	No	No	Alive or dead of other cause	0	Dead	One primary only	56	6235089
White	Male	8170	T2	N0	0	No radiation and/or cancer-directed surgery	Not recommended	No/Unknown	17	20	No	No	No	No	Alive or dead of other cause	39	Alive	One primary only	26	6235163
White	Female	8170	T1	N0	16	No radiation and/or cancer-directed surgery	Surgery performed	No/Unknown	26	20	No	No	No	No	Alive or dead of other cause	12	Alive	One primary only	72	6235172
Other (American Indian/AK Native, Asian/Pacific Islander)	Male	8170	T1	N0	36	No radiation and/or cancer-directed surgery	Surgery performed	No/Unknown	45	20	No	No	No	No	Alive or dead of other cause	11	Alive	One primary only	69	6235520
Other (American Indian/AK Native, Asian/Pacific Islander)	Male	8170	T1	N0	0	No radiation and/or cancer-directed surgery	Recommended, unknown if performed	Yes	19	20	No	No	No	No	Alive or dead of other cause	13	Alive	One primary only	61	6235571
White	Male	8170	T1	N0	16	No radiation and/or cancer-directed surgery	Surgery performed	No/Unknown	25	20	No	No	No	No	Alive or dead of other cause	15	Alive	One primary only	67	6235604
Other (American Indian/AK Native, Asian/Pacific Islander)	Female	8170	T1	N0	61	No radiation and/or cancer-directed surgery	Surgery performed	No/Unknown	6	999	No	No	No	No	Alive or dead of other cause	11	Alive	One primary only	62	6235731
White	Female	8170	T3a	N0	0	No radiation and/or cancer-directed surgery	Not recommended	No/Unknown	53	20	No	No	No	No	Alive or dead of other cause	12	Dead	One primary only	79	6235860
White	Male	8170	T2	N0	0	No radiation and/or cancer-directed surgery	Not recommended	Yes	31	10	No	No	No	No	Alive or dead of other cause	11	Alive	One primary only	61	6235909
White	Male	8170	T1	N0	0	No radiation and/or cancer-directed surgery	Not recommended	Yes	46	20	No	No	No	No	Alive or dead of other cause	15	Alive	One primary only	62	6236000
White	Male	8170	T3a	N0	0	No radiation and/or cancer-directed surgery	Not recommended	Yes	110	20	No	No	No	No	Alive or dead of other cause	10	Alive	One primary only	67	6236092
White	Female	8170	TX	N0	0	No radiation and/or cancer-directed surgery	Not recommended	No/Unknown	999	998	No	No	No	No	Dead (attributable to this cancer dx)	2	Dead	One primary only	61	6236159
Other (American Indian/AK Native, Asian/Pacific Islander)	Male	8170	T1	N0	0	No radiation and/or cancer-directed surgery	Not recommended	No/Unknown	65	20	No	Yes	No	No	Dead (attributable to this cancer dx)	0	Dead	One primary only	88	6236201
Other (American Indian/AK Native, Asian/Pacific Islander)	Female	8170	T3b	N0	0	No radiation and/or cancer-directed surgery	Not recommended	Yes	36	10	No	No	No	Yes	Alive or dead of other cause	15	Alive	One primary only	60	6236212
Black	Female	8170	T2	N0	0	No radiation and/or cancer-directed surgery	Not recommended	Yes	39	10	No	No	No	No	Alive or dead of other cause	12	Alive	One primary only	55	6236214
Other (American Indian/AK Native, Asian/Pacific Islander)	Male	8170	T3a	N0	0	No radiation and/or cancer-directed surgery	Not recommended	Yes	77	10	Yes	No	No	No	Alive or dead of other cause	10	Alive	One primary only	47	6236341
Black	Male	8170	T1	N0	16	No radiation and/or cancer-directed surgery	Surgery performed	No/Unknown	32	10	No	No	No	No	Alive or dead of other cause	10	Alive	One primary only	64	6236529
Other (American Indian/AK Native, Asian/Pacific Islander)	Female	8170	T1	N0	0	No radiation and/or cancer-directed surgery	Not recommended	Yes	22	20	No	No	No	No	Alive or dead of other cause	12	Alive	One primary only	61	6236719
Other (American Indian/AK Native, Asian/Pacific Islander)	Female	8170	T1	N0	23	Intraoperative radiation	Surgery performed	No/Unknown	45	998	No	No	No	No	Alive or dead of other cause	9	Alive	One primary only	84	6236983
White	Male	8170	T2	N0	0	No radiation and/or cancer-directed surgery	Not recommended	No/Unknown	50	10	No	No	No	No	Alive or dead of other cause	9	Alive	One primary only	64	6237022
Other (American Indian/AK Native, Asian/Pacific Islander)	Female	8170	T2	N0	0	No radiation and/or cancer-directed surgery	Not recommended	No/Unknown	49	10	No	No	No	No	Dead (attributable to this cancer dx)	1	Dead	One primary only	86	6237032
Other (American Indian/AK Native, Asian/Pacific Islander)	Male	8170	T3a	N0	0	No radiation and/or cancer-directed surgery	Not recommended	Yes	52	10	No	No	No	No	Alive or dead of other cause	10	Alive	One primary only	65	6237130
Black	Male	8170	T3b	N0	0	No radiation and/or cancer-directed surgery	Not recommended	Yes	80	10	No	No	No	No	Alive or dead of other cause	15	Alive	One primary only	64	6237208
Other (American Indian/AK Native, Asian/Pacific Islander)	Female	8170	T1	N0	0	No radiation and/or cancer-directed surgery	Not recommended	Yes	15	20	No	No	No	No	Alive or dead of other cause	12	Alive	One primary only	69	6237210
Other (American Indian/AK Native, Asian/Pacific Islander)	Male	8170	T3a	N0	0	No radiation and/or cancer-directed surgery	Not recommended	No/Unknown	127	10	No	No	No	No	Alive or dead of other cause	7	Alive	One primary only	83	6237441
Other (American Indian/AK Native, Asian/Pacific Islander)	Male	8170	T2	N0	0	No radiation and/or cancer-directed surgery	Not recommended	Yes	45	20	No	No	No	No	Alive or dead of other cause	12	Alive	One primary only	56	6237614
Other (American Indian/AK Native, Asian/Pacific Islander)	Male	8170	T3b	N0	0	No radiation and/or cancer-directed surgery	Not recommended	Yes	123	10	No	No	No	No	Alive or dead of other cause	12	Alive	One primary only	59	6237708
White	Female	8170	T2	N0	16	No radiation and/or cancer-directed surgery	Surgery performed	Yes	25	20	No	No	No	No	Alive or dead of other cause	6	Alive	One primary only	67	6237711
White	Male	8170	T1	N1	0	No radiation and/or cancer-directed surgery	Not recommended	No/Unknown	14	10	No	No	No	No	Dead (attributable to this cancer dx)	0	Dead	One primary only	70	6237941
Other (American Indian/AK Native, Asian/Pacific Islander)	Male	8170	T1	N0	0	No radiation and/or cancer-directed surgery	Not recommended	No/Unknown	31	20	No	No	No	No	Dead (attributable to this cancer dx)	0	Dead	One primary only	82	6237957
Other (American Indian/AK Native, Asian/Pacific Islander)	Male	8170	T1	N0	0	No radiation and/or cancer-directed surgery	Not recommended	No/Unknown	76	20	No	No	No	No	Alive or dead of other cause	10	Alive	One primary only	81	6238039
Other (American Indian/AK Native, Asian/Pacific Islander)	Female	8170	T2	N0	0	No radiation and/or cancer-directed surgery	Not recommended	No/Unknown	14	20	No	No	No	No	Alive or dead of other cause	48	Alive	One primary only	49	6238041
White	Male	8170	T1	N0	0	No radiation and/or cancer-directed surgery	Not recommended	No/Unknown	11	999	No	No	No	No	Alive or dead of other cause	31	Alive	1st of 2 or more primaries	61	6238054
Other (American Indian/AK Native, Asian/Pacific Islander)	Male	8170	T1	N0	0	No radiation and/or cancer-directed surgery	Not recommended	No/Unknown	20	20	No	No	No	No	Alive or dead of other cause	19	Alive	One primary only	60	6238055
Other (American Indian/AK Native, Asian/Pacific Islander)	Female	8170	T1	N0	51	No radiation and/or cancer-directed surgery	Surgery performed	No/Unknown	32	10	No	No	No	No	Alive or dead of other cause	10	Alive	One primary only	44	6238074
White	Female	8170	T3a	N0	0	No radiation and/or cancer-directed surgery	Not recommended	No/Unknown	93	10	No	No	No	No	Alive or dead of other cause	1	Dead	One primary only	80	6238110
White	Male	8170	T1	N1	0	No radiation and/or cancer-directed surgery	Not recommended	Yes	147	10	No	No	No	No	Alive or dead of other cause	13	Alive	One primary only	41	6238385
White	Female	8170	TX	N0	0	No radiation and/or cancer-directed surgery	Not recommended	Yes	999	10	No	No	No	No	Alive or dead of other cause	12	Alive	One primary only	71	6238437
Other (American Indian/AK Native, Asian/Pacific Islander)	Female	8170	T1	N0	36	No radiation and/or cancer-directed surgery	Surgery performed	No/Unknown	15	10	No	No	No	No	Alive or dead of other cause	10	Alive	One primary only	74	6238453
Other (American Indian/AK Native, Asian/Pacific Islander)	Male	8170	TX	N0	0	No radiation and/or cancer-directed surgery	Not recommended, contraindicated due to other cond; autopsy only (1973-2002)	No/Unknown	999	10	No	No	No	No	Dead (attributable to this cancer dx)	0	Dead	One primary only	52	6238592
White	Female	8170	T1	N0	0	No radiation and/or cancer-directed surgery	Not recommended, contraindicated due to other cond; autopsy only (1973-2002)	Yes	104	20	No	No	No	No	Dead (attributable to this cancer dx)	8	Dead	One primary only	58	6238658
Other (American Indian/AK Native, Asian/Pacific Islander)	Male	8170	T1	N0	16	No radiation and/or cancer-directed surgery	Surgery performed	No/Unknown	21	20	No	No	No	No	Alive or dead of other cause	12	Alive	One primary only	38	6238701
White	Male	8170	T1	N0	0	No radiation and/or cancer-directed surgery	Not recommended	No/Unknown	24	10	No	No	No	No	Alive or dead of other cause	8	Dead	One primary only	73	6238709
White	Male	8170	T1	N0	0	No radiation and/or cancer-directed surgery	Not recommended	No/Unknown	26	10	No	No	No	No	Alive or dead of other cause	29	Alive	One primary only	48	6238759
White	Male	8170	T1	N0	0	No radiation and/or cancer-directed surgery	Not recommended	No/Unknown	30	10	No	No	No	No	Dead (attributable to this cancer dx)	9	Dead	One primary only	74	6238761
Black	Male	8170	T1	N0	0	No radiation and/or cancer-directed surgery	Not recommended	Yes	60	10	No	No	No	No	Dead (attributable to this cancer dx)	3	Dead	One primary only	56	6238887
Other (American Indian/AK Native, Asian/Pacific Islander)	Male	8170	T1	N0	24	No radiation and/or cancer-directed surgery	Surgery performed	No/Unknown	22	10	No	No	No	No	Alive or dead of other cause	10	Alive	One primary only	62	6238957
Other (American Indian/AK Native, Asian/Pacific Islander)	Male	8170	T1	N0	16	No radiation and/or cancer-directed surgery	Surgery performed	No/Unknown	13	10	No	No	No	No	Alive or dead of other cause	13	Alive	One primary only	57	6239091
White	Male	8170	T2	N0	0	No radiation and/or cancer-directed surgery	Not recommended	Yes	25	20	No	No	No	No	Alive or dead of other cause	14	Alive	One primary only	70	6239589
White	Male	8170	T3b	N1	0	No radiation and/or cancer-directed surgery	Not recommended	Yes	52	10	No	No	No	No	Dead (attributable to this cancer dx)	8	Dead	One primary only	72	6239750
Other (American Indian/AK Native, Asian/Pacific Islander)	Male	8170	T2	N0	0	No radiation and/or cancer-directed surgery	Not recommended	Yes	49	10	No	No	No	No	Alive or dead of other cause	9	Alive	One primary only	80	6239753
Other (American Indian/AK Native, Asian/Pacific Islander)	Male	8170	T3a	N0	0	No radiation and/or cancer-directed surgery	Not recommended	Yes	97	10	No	No	No	No	Dead (attributable to this cancer dx)	7	Dead	One primary only	63	6239817
White	Female	8170	T1	N0	0	No radiation and/or cancer-directed surgery	Not recommended	Yes	24	10	No	No	No	No	Alive or dead of other cause	8	Dead	One primary only	82	6239827
White	Male	8170	T2	N0	61	No radiation and/or cancer-directed surgery	Surgery performed	Yes	22	20	No	No	No	No	Alive or dead of other cause	10	Alive	One primary only	64	6239884
White	Male	8170	T1	N0	0	No radiation and/or cancer-directed surgery	Not recommended	Yes	22	20	No	No	No	No	Alive or dead of other cause	10	Alive	One primary only	68	6240138
White	Male	8170	T1	N0	0	No radiation and/or cancer-directed surgery	Not recommended	Yes	28	20	No	No	No	No	Alive or dead of other cause	10	Alive	One primary only	67	6240141
Black	Male	8170	T1	N0	0	No radiation and/or cancer-directed surgery	Not recommended	No/Unknown	10	20	No	No	No	No	Alive or dead of other cause	9	Alive	One primary only	61	6240142
White	Male	8170	T1	N0	0	No radiation and/or cancer-directed surgery	Not recommended	Yes	100	999	No	No	No	No	Dead (attributable to this cancer dx)	19	Dead	One primary only	58	6240161
Other (American Indian/AK Native, Asian/Pacific Islander)	Male	8170	T2	N0	60	No radiation and/or cancer-directed surgery	Surgery performed	No/Unknown	105	20	No	No	No	No	Alive or dead of other cause	9	Alive	One primary only	53	6240215
White	Male	8170	T1	N0	23	No radiation and/or cancer-directed surgery	Surgery performed	No/Unknown	10	10	No	No	No	No	Alive or dead of other cause	9	Alive	One primary only	61	6240248
Black	Male	8170	T1	N0	0	No radiation and/or cancer-directed surgery	Not recommended	Yes	20	10	No	No	No	No	Alive or dead of other cause	11	Alive	One primary only	49	6240296
Other (American Indian/AK Native, Asian/Pacific Islander)	Male	8170	T1	N0	0	No radiation and/or cancer-directed surgery	Not recommended	No/Unknown	77	20	No	No	No	No	Alive or dead of other cause	12	Alive	One primary only	62	6240321
White	Male	8170	T1	N0	0	No radiation and/or cancer-directed surgery	Not recommended	No/Unknown	70	10	No	No	No	No	Dead (attributable to this cancer dx)	4	Dead	One primary only	74	6240461
White	Female	8170	T1	N0	0	No radiation and/or cancer-directed surgery	Not recommended	No/Unknown	54	10	No	No	No	No	Dead (attributable to this cancer dx)	0	Dead	One primary only	69	6240491
Other (American Indian/AK Native, Asian/Pacific Islander)	Male	8170	T3b	N0	0	No radiation and/or cancer-directed surgery	Not recommended	Yes	37	20	No	No	No	Yes	Dead (attributable to this cancer dx)	5	Dead	One primary only	41	6240502
Black	Male	8170	T3b	N0	0	No radiation and/or cancer-directed surgery	Not recommended	Yes	999	10	No	No	No	No	Alive or dead of other cause	8	Alive	One primary only	61	6240505
Other (American Indian/AK Native, Asian/Pacific Islander)	Male	8170	T2	N0	51	No radiation and/or cancer-directed surgery	Surgery performed	No/Unknown	75	10	No	No	No	No	Alive or dead of other cause	9	Alive	One primary only	54	6240510
White	Male	8170	T1	N0	16	No radiation and/or cancer-directed surgery	Surgery performed	Yes	22	20	No	No	No	No	Alive or dead of other cause	11	Alive	One primary only	61	6240533
White	Male	8170	T2	N0	16	No radiation and/or cancer-directed surgery	Surgery performed	Yes	11	10	No	No	No	No	Alive or dead of other cause	8	Alive	One primary only	64	6240551
White	Male	8170	T1	N0	0	No radiation and/or cancer-directed surgery	Recommended, unknown if performed	Yes	41	10	No	No	No	No	Alive or dead of other cause	8	Alive	One primary only	63	6240552
White	Male	8170	T1	N0	0	No radiation and/or cancer-directed surgery	Recommended, unknown if performed	Yes	30	10	No	No	No	No	Alive or dead of other cause	8	Alive	One primary only	62	6240553
White	Male	8170	T2	N0	0	No radiation and/or cancer-directed surgery	Recommended, unknown if performed	No/Unknown	27	998	No	No	No	No	Alive or dead of other cause	8	Alive	One primary only	67	6240554
White	Female	8170	T2	N0	0	No radiation and/or cancer-directed surgery	Not recommended	No/Unknown	31	10	No	No	No	No	Alive or dead of other cause	2	Alive	One primary only	66	6240621
White	Female	8170	T3a	N0	0	No radiation and/or cancer-directed surgery	Not recommended	Yes	82	10	No	No	No	No	Alive or dead of other cause	4	Alive	One primary only	66	6240623
Black	Male	8170	T3a	N0	0	No radiation and/or cancer-directed surgery	Not recommended	Yes	86	10	No	No	No	No	Alive or dead of other cause	9	Alive	One primary only	58	6240627
White	Male	8170	T3a	N0	0	No radiation and/or cancer-directed surgery	Not recommended	No/Unknown	84	10	No	No	No	No	Dead (attributable to this cancer dx)	0	Dead	One primary only	64	6240640
Other (American Indian/AK Native, Asian/Pacific Islander)	Male	8170	T3a	N0	0	No radiation and/or cancer-directed surgery	Not recommended	Yes	58	10	No	No	No	No	Dead (attributable to this cancer dx)	20	Dead	One primary only	54	6240878
White	Female	8170	T1	N0	16	No radiation and/or cancer-directed surgery	Surgery performed	No/Unknown	23	10	No	No	No	No	Dead (attributable to this cancer dx)	6	Dead	One primary only	76	6240997
Other (American Indian/AK Native, Asian/Pacific Islander)	Male	8170	T1	N0	16	No radiation and/or cancer-directed surgery	Surgery performed	Yes	20	20	No	No	No	No	Alive or dead of other cause	10	Alive	One primary only	48	6240999
Black	Female	8170	TX	NX	0	No radiation and/or cancer-directed surgery	Not recommended	No/Unknown	999	999	No	No	No	No	Dead (attributable to this cancer dx)	0	Dead	One primary only	69	6241036
White	Female	8170	T1	N0	0	No radiation and/or cancer-directed surgery	Not performed, patient died prior to recommended surgery	No/Unknown	12	20	No	No	No	No	Alive or dead of other cause	7	Dead	One primary only	57	6241067
White	Male	8170	T2	N0	0	No radiation and/or cancer-directed surgery	Not recommended	Yes	35	20	No	No	No	No	Alive or dead of other cause	10	Alive	One primary only	66	6241091
White	Male	8170	T3b	N0	0	No radiation and/or cancer-directed surgery	Not recommended	No/Unknown	102	10	No	No	No	No	Dead (attributable to this cancer dx)	1	Dead	One primary only	65	6241165
White	Female	8170	T2	N1	0	No radiation and/or cancer-directed surgery	Not recommended	No/Unknown	38	10	No	No	No	No	Alive or dead of other cause	6	Alive	One primary only	66	6241510
White	Male	8170	T2	N0	16	No radiation and/or cancer-directed surgery	Surgery performed	No/Unknown	19	20	No	No	No	No	Alive or dead of other cause	13	Alive	One primary only	58	6241974
Other (American Indian/AK Native, Asian/Pacific Islander)	Male	8170	TX	N0	0	No radiation and/or cancer-directed surgery	Not recommended	Yes	999	10	Yes	No	No	No	Dead (attributable to this cancer dx)	2	Dead	One primary only	83	6241987
Other (American Indian/AK Native, Asian/Pacific Islander)	Male	8170	TX	N0	0	No radiation and/or cancer-directed surgery	Not recommended	No/Unknown	999	10	No	No	No	No	Dead (attributable to this cancer dx)	0	Dead	One primary only	94	6242013
White	Male	8170	T2	N0	16	No radiation and/or cancer-directed surgery	Surgery performed	Yes	38	20	No	No	No	No	Alive or dead of other cause	11	Alive	One primary only	80	6242160
Other (American Indian/AK Native, Asian/Pacific Islander)	Male	8170	T3b	N0	0	No radiation and/or cancer-directed surgery	Not recommended	No/Unknown	150	10	No	No	No	No	Dead (attributable to this cancer dx)	1	Dead	One primary only	51	6242495
Other (American Indian/AK Native, Asian/Pacific Islander)	Male	8170	T2	N0	0	No radiation and/or cancer-directed surgery	Not recommended	Yes	170	20	No	No	No	No	Alive or dead of other cause	7	Alive	One primary only	81	6242496
Other (American Indian/AK Native, Asian/Pacific Islander)	Male	8170	T1	N0	16	No radiation and/or cancer-directed surgery	Surgery performed	No/Unknown	14	10	No	No	No	No	Alive or dead of other cause	7	Alive	One primary only	63	6242503
Black	Female	8170	T2	N0	16	No radiation and/or cancer-directed surgery	Surgery performed	Yes	21	10	No	No	No	No	Alive or dead of other cause	15	Alive	One primary only	58	6242550
White	Male	8170	T2	N0	0	No radiation and/or cancer-directed surgery	Not recommended	Yes	49	10	No	No	No	No	Dead (attributable to this cancer dx)	1	Dead	One primary only	51	6242667
Black	Male	8170	T1	N0	0	No radiation and/or cancer-directed surgery	Not recommended	Yes	40	10	No	No	No	No	Alive or dead of other cause	11	Alive	1st of 2 or more primaries	64	6242757
White	Female	8170	T1	N0	0	No radiation and/or cancer-directed surgery	Not recommended	Yes	66	10	No	No	No	No	Alive or dead of other cause	8	Alive	One primary only	77	6242772
White	Male	8174	T1	N0	23	No radiation and/or cancer-directed surgery	Surgery performed	No/Unknown	23	20	No	No	No	No	Alive or dead of other cause	9	Alive	One primary only	74	6242786
Black	Female	8170	T1	N0	0	No radiation and/or cancer-directed surgery	Not recommended	No/Unknown	24	20	No	No	No	No	Alive or dead of other cause	1	Dead	One primary only	63	6242818
White	Male	8170	T1	N0	23	No radiation and/or cancer-directed surgery	Surgery performed	Yes	34	10	No	No	No	No	Alive or dead of other cause	18	Alive	One primary only	63	6242903
White	Male	8170	T2	N0	0	No radiation and/or cancer-directed surgery	Not recommended	No/Unknown	50	10	No	No	No	No	Dead (attributable to this cancer dx)	11	Dead	One primary only	67	6242908
White	Male	8170	T2	N0	0	No radiation and/or cancer-directed surgery	Not recommended	No/Unknown	28	20	No	No	No	No	Alive or dead of other cause	17	Alive	One primary only	66	6242957
Black	Male	8170	T3b	N0	0	No radiation and/or cancer-directed surgery	Not recommended	No/Unknown	89	10	Yes	No	No	No	Dead (attributable to this cancer dx)	8	Dead	One primary only	63	6242985
White	Male	8170	T2	N0	0	No radiation and/or cancer-directed surgery	Not recommended	Yes	22	10	No	No	No	No	Alive or dead of other cause	8	Dead	One primary only	62	6243032
White	Male	8170	T2	N0	0	No radiation and/or cancer-directed surgery	Not recommended	Yes	40	20	No	No	No	No	Dead (attributable to this cancer dx)	21	Dead	One primary only	61	6243310
White	Male	8170	T3a	N1	0	No radiation and/or cancer-directed surgery	Not recommended	Yes	52	20	No	No	No	No	Alive or dead of other cause	11	Alive	One primary only	56	6243314
Other (American Indian/AK Native, Asian/Pacific Islander)	Female	8170	T1	N0	16	No radiation and/or cancer-directed surgery	Surgery performed	Yes	29	10	No	No	No	No	Alive or dead of other cause	11	Alive	One primary only	78	6243368
White	Male	8170	T1	N0	0	No radiation and/or cancer-directed surgery	Not recommended	Yes	42	10	No	No	No	No	Alive or dead of other cause	9	Alive	One primary only	67	6243425
Other (American Indian/AK Native, Asian/Pacific Islander)	Male	8170	T1	N0	16	No radiation and/or cancer-directed surgery	Surgery performed	Yes	20	10	No	No	No	No	Alive or dead of other cause	9	Alive	One primary only	57	6243433
Other (American Indian/AK Native, Asian/Pacific Islander)	Male	8170	T1	N0	0	No radiation and/or cancer-directed surgery	Recommended, unknown if performed	No/Unknown	45	10	No	No	No	No	Alive or dead of other cause	7	Alive	One primary only	69	6243623
White	Male	8170	T2	N0	0	No radiation and/or cancer-directed surgery	Not recommended	Yes	26	10	No	No	No	No	Dead (attributable to this cancer dx)	11	Dead	1st of 2 or more primaries	57	6243642
Other (American Indian/AK Native, Asian/Pacific Islander)	Male	8170	T2	N0	0	No radiation and/or cancer-directed surgery	Not recommended	Yes	36	10	No	No	No	No	Alive or dead of other cause	9	Alive	One primary only	71	6243687
Black	Male	8170	T2	N0	17	No radiation and/or cancer-directed surgery	Surgery performed	No/Unknown	30	998	No	No	No	No	Dead (attributable to this cancer dx)	6	Dead	One primary only	66	6243756
White	Male	8170	T2	N0	0	No radiation and/or cancer-directed surgery	Not recommended	No/Unknown	134	10	No	No	No	No	Dead (attributable to this cancer dx)	0	Dead	One primary only	74	6244138
Black	Male	8170	TX	N0	0	No radiation and/or cancer-directed surgery	Not recommended	No/Unknown	999	10	No	No	No	Yes	Dead (attributable to this cancer dx)	0	Dead	One primary only	26	6244141
Other (American Indian/AK Native, Asian/Pacific Islander)	Female	8170	T2	N0	36	No radiation and/or cancer-directed surgery	Surgery performed	No/Unknown	170	10	No	No	No	No	Alive or dead of other cause	7	Alive	1st of 2 or more primaries	67	6244525
Other (American Indian/AK Native, Asian/Pacific Islander)	Male	8170	T1	N0	37	No radiation and/or cancer-directed surgery	Surgery performed	No/Unknown	25	20	No	No	No	No	Alive or dead of other cause	8	Alive	One primary only	68	6244560
White	Female	8170	T1	N0	0	No radiation and/or cancer-directed surgery	Not recommended	No/Unknown	43	20	No	No	No	No	Dead (attributable to this cancer dx)	4	Dead	One primary only	72	6244624
Black	Male	8170	T1	N0	23	No radiation and/or cancer-directed surgery	Surgery performed	No/Unknown	31	20	No	No	No	No	Alive or dead of other cause	12	Alive	One primary only	63	6244690
Other (American Indian/AK Native, Asian/Pacific Islander)	Male	8170	TX	NX	0	No radiation and/or cancer-directed surgery	Not recommended	No/Unknown	154	999	No	No	No	No	Dead (attributable to this cancer dx)	0	Dead	One primary only	78	6244755
White	Male	8170	T2	N0	0	No radiation and/or cancer-directed surgery	Not recommended	Yes	17	10	No	No	No	No	Alive or dead of other cause	11	Alive	One primary only	62	6244917
Other (American Indian/AK Native, Asian/Pacific Islander)	Male	8170	T2	N0	0	No radiation and/or cancer-directed surgery	Not recommended	Yes	22	20	No	No	No	No	Alive or dead of other cause	9	Alive	One primary only	54	6245209
White	Male	8170	T3a	NX	0	No radiation and/or cancer-directed surgery	Not recommended	No/Unknown	130	10	No	No	No	No	Alive or dead of other cause	23	Alive	1st of 2 or more primaries	59	6245212
White	Male	8170	TX	N0	0	No radiation and/or cancer-directed surgery	Not recommended	No/Unknown	55	20	No	No	No	No	Dead (attributable to this cancer dx)	3	Dead	One primary only	52	6245328
Black	Male	8174	T2	N0	23	No radiation and/or cancer-directed surgery	Surgery performed	No/Unknown	18	20	No	No	No	No	Alive or dead of other cause	9	Alive	One primary only	61	6245362
White	Male	8170	T1	N0	0	No radiation and/or cancer-directed surgery	Not recommended	No/Unknown	39	10	No	No	No	No	Dead (attributable to this cancer dx)	1	Dead	One primary only	69	6245657
Black	Male	8170	T2	N0	0	No radiation and/or cancer-directed surgery	Not recommended	No/Unknown	50	10	Yes	No	Yes	No	Dead (attributable to this cancer dx)	2	Dead	One primary only	63	6245701
Other (American Indian/AK Native, Asian/Pacific Islander)	Male	8170	T1	N0	0	No radiation and/or cancer-directed surgery	Not recommended	No/Unknown	40	998	No	No	No	No	Alive or dead of other cause	12	Alive	One primary only	66	6245753
Other (American Indian/AK Native, Asian/Pacific Islander)	Male	8170	T3a	N0	0	No radiation and/or cancer-directed surgery	Not recommended	Yes	66	10	No	No	No	No	Alive or dead of other cause	7	Alive	One primary only	45	6245756
White	Male	8170	T3b	N0	0	No radiation and/or cancer-directed surgery	Not recommended	No/Unknown	999	10	No	No	No	Yes	Dead (attributable to this cancer dx)	1	Dead	One primary only	64	6245775
White	Male	8170	T2	N0	0	No radiation and/or cancer-directed surgery	Not recommended	No/Unknown	42	10	No	No	No	No	Dead (attributable to this cancer dx)	3	Dead	One primary only	68	6245810
Other (American Indian/AK Native, Asian/Pacific Islander)	Female	8170	T1	N1	0	No radiation and/or cancer-directed surgery	Not recommended	No/Unknown	108	10	No	Yes	No	No	Dead (attributable to this cancer dx)	1	Dead	One primary only	89	6245927
White	Male	8170	T2	N0	0	No radiation and/or cancer-directed surgery	Not recommended	Yes	15	20	No	No	No	No	Alive or dead of other cause	3	Dead	One primary only	64	6246114
Other (American Indian/AK Native, Asian/Pacific Islander)	Male	8170	T1	N0	22	No radiation and/or cancer-directed surgery	Surgery performed	Yes	79	10	No	No	No	Yes	Alive or dead of other cause	8	Alive	One primary only	56	6246121
White	Male	8170	T3b	N0	0	No radiation and/or cancer-directed surgery	Not recommended	Yes	999	10	No	No	No	No	Dead (attributable to this cancer dx)	4	Dead	One primary only	58	6246220
White	Male	8170	T1	N0	24	No radiation and/or cancer-directed surgery	Surgery performed	No/Unknown	27	20	No	No	No	No	Alive or dead of other cause	8	Alive	One primary only	42	6246295
White	Male	8170	T3a	N0	0	No radiation and/or cancer-directed surgery	Not recommended	Yes	74	998	Yes	No	No	No	Dead (attributable to this cancer dx)	6	Dead	One primary only	61	6246343
Other (American Indian/AK Native, Asian/Pacific Islander)	Male	8170	T3a	N1	0	No radiation and/or cancer-directed surgery	Not recommended	No/Unknown	72	10	No	No	No	No	Alive or dead of other cause	1	Alive	One primary only	52	6246447
White	Male	8170	T3b	NX	0	No radiation and/or cancer-directed surgery	Not recommended	Yes	55	10	No	No	No	No	Alive or dead of other cause	2	Alive	One primary only	59	6246548
White	Female	8170	T3a	N0	0	No radiation and/or cancer-directed surgery	Not recommended	No/Unknown	80	10	No	No	No	Yes	Dead (attributable to this cancer dx)	8	Dead	One primary only	56	6246662
Black	Male	8170	TX	N0	0	No radiation and/or cancer-directed surgery	Not recommended	No/Unknown	999	10	No	No	No	No	Dead (attributable to this cancer dx)	0	Dead	One primary only	43	6246819
Black	Female	8170	T1	N0	16	No radiation and/or cancer-directed surgery	Surgery performed	Yes	999	20	No	No	No	No	Alive or dead of other cause	10	Alive	One primary only	29	6246835
Black	Female	8170	T3b	N0	0	No radiation and/or cancer-directed surgery	Not recommended	No/Unknown	85	20	No	No	No	Yes	Alive or dead of other cause	3	Dead	One primary only	65	6247055
White	Female	8170	T3a	NX	0	No radiation and/or cancer-directed surgery	Not recommended	No/Unknown	70	999	No	No	No	No	Alive or dead of other cause	6	Alive	One primary only	85	6247311
Other (American Indian/AK Native, Asian/Pacific Islander)	Male	8170	T3a	N0	0	No radiation and/or cancer-directed surgery	Not recommended	No/Unknown	189	10	No	No	No	No	Dead (attributable to this cancer dx)	1	Dead	One primary only	69	6247388
White	Male	8170	T1	N0	16	No radiation and/or cancer-directed surgery	Surgery performed	No/Unknown	12	10	No	No	No	No	Alive or dead of other cause	7	Alive	One primary only	64	6247398
White	Male	8170	T1	N0	0	No radiation and/or cancer-directed surgery	Not recommended	No/Unknown	100	20	No	No	No	No	Dead (attributable to this cancer dx)	6	Dead	One primary only	57	6247404
Other (American Indian/AK Native, Asian/Pacific Islander)	Male	8170	T2	N0	21	No radiation and/or cancer-directed surgery	Surgery performed	No/Unknown	60	10	No	No	No	No	Alive or dead of other cause	7	Alive	One primary only	69	6247459
White	Male	8170	TX	N1	0	No radiation and/or cancer-directed surgery	Not recommended	Yes	999	20	No	No	No	Yes	Dead (attributable to this cancer dx)	8	Dead	One primary only	66	6247488
White	Male	8170	T3b	N1	0	No radiation and/or cancer-directed surgery	Not recommended, contraindicated due to other cond; autopsy only (1973-2002)	No/Unknown	29	10	No	No	No	No	Alive or dead of other cause	0	Alive	One primary only	69	6247558
White	Male	8170	T2	N0	0	No radiation and/or cancer-directed surgery	Not recommended	No/Unknown	41	10	No	No	No	No	Dead (attributable to this cancer dx)	1	Dead	One primary only	60	6247595
White	Female	8170	TX	N0	0	No radiation and/or cancer-directed surgery	Not recommended	Yes	999	10	No	No	No	No	Dead (attributable to this cancer dx)	3	Dead	One primary only	58	6247607
Other (American Indian/AK Native, Asian/Pacific Islander)	Female	8170	T1	N0	0	No radiation and/or cancer-directed surgery	Not recommended	No/Unknown	999	10	No	No	No	No	Alive or dead of other cause	6	Alive	One primary only	86	6247683
Other (American Indian/AK Native, Asian/Pacific Islander)	Male	8170	T1	N0	36	No radiation and/or cancer-directed surgery	Surgery performed	No/Unknown	45	10	No	No	No	No	Alive or dead of other cause	8	Alive	One primary only	65	6247885
Black	Male	8170	T3a	N0	0	No radiation and/or cancer-directed surgery	Not recommended	Yes	66	10	Yes	No	No	No	Alive or dead of other cause	5	Dead	One primary only	66	6248074
White	Female	8170	T2	N0	0	No radiation and/or cancer-directed surgery	Not recommended	Yes	21	20	No	No	No	No	Alive or dead of other cause	8	Alive	One primary only	83	6248204
White	Female	8170	T2	N0	0	No radiation and/or cancer-directed surgery	Not recommended	Yes	40	10	No	No	No	No	Alive or dead of other cause	8	Alive	One primary only	83	6248207
Black	Female	8170	T1	N0	0	No radiation and/or cancer-directed surgery	Not recommended	No/Unknown	16	20	No	No	No	No	Alive or dead of other cause	7	Alive	One primary only	59	6248228
White	Male	8170	T2	N0	0	No radiation and/or cancer-directed surgery	Not recommended	Yes	32	10	No	No	No	No	Alive or dead of other cause	9	Alive	One primary only	66	6248419
White	Male	8170	T2	N0	0	No radiation and/or cancer-directed surgery	Not recommended	Yes	75	10	No	No	No	No	Alive or dead of other cause	8	Alive	One primary only	62	6248423
Black	Male	8170	T3a	N0	0	No radiation and/or cancer-directed surgery	Not recommended	Yes	50	10	No	No	No	No	Alive or dead of other cause	8	Alive	One primary only	64	6248515
White	Male	8170	T1	N0	0	No radiation and/or cancer-directed surgery	Not recommended	Yes	20	10	No	No	No	No	Alive or dead of other cause	5	Alive	One primary only	60	6248529
Other (American Indian/AK Native, Asian/Pacific Islander)	Male	8170	T1	N0	0	No radiation and/or cancer-directed surgery	Not recommended	No/Unknown	47	10	No	No	No	No	Dead (attributable to this cancer dx)	2	Dead	One primary only	63	6248534
Other (American Indian/AK Native, Asian/Pacific Islander)	Male	8170	T1	N0	0	No radiation and/or cancer-directed surgery	Not recommended	Yes	13	20	No	No	No	No	Alive or dead of other cause	7	Alive	One primary only	71	6248535
White	Male	8170	T3a	N0	0	No radiation and/or cancer-directed surgery	Not recommended	Yes	70	10	No	No	No	No	Dead (attributable to this cancer dx)	2	Dead	One primary only	68	6248548
White	Male	8170	T3b	N0	0	No radiation and/or cancer-directed surgery	Not recommended	No/Unknown	140	10	No	No	No	No	Dead (attributable to this cancer dx)	5	Dead	One primary only	57	6248732
White	Male	8170	T1	N0	23	No radiation and/or cancer-directed surgery	Surgery performed	No/Unknown	55	998	No	No	No	No	Alive or dead of other cause	6	Alive	One primary only	62	6249016
Other (American Indian/AK Native, Asian/Pacific Islander)	Male	8170	T1	N0	0	No radiation and/or cancer-directed surgery	Not recommended	Yes	47	10	No	No	No	No	Alive or dead of other cause	9	Alive	One primary only	71	6249363
Other (American Indian/AK Native, Asian/Pacific Islander)	Male	8170	T3a	N0	38	No radiation and/or cancer-directed surgery	Surgery performed	No/Unknown	180	998	No	No	No	No	Alive or dead of other cause	8	Alive	One primary only	74	6249397
Black	Male	8170	T1	N0	16	No radiation and/or cancer-directed surgery	Surgery performed	No/Unknown	24	20	No	No	No	No	Alive or dead of other cause	8	Alive	One primary only	69	6249577
Other (American Indian/AK Native, Asian/Pacific Islander)	Male	8174	T2	N0	0	No radiation and/or cancer-directed surgery	Not recommended	No/Unknown	35	10	No	No	No	No	Alive or dead of other cause	2	Alive	One primary only	63	6249609
[truncated: 28,684 more rows]
